# Supplementary material for: Revisiting the F + HCl → HF + Cl reaction using a multireference coupled-cluster method
Source: Royal Society of Chemistry journal article supplement (doi:10.1039/c6cp05782a), 2016-01-01
Supplement: c6cp05782a2.tgz [file c6cp05782a2.tgz]

Archive with 37 entries (33 files):
- supp_info_MRCC_PES
- supp_info_MRCC_PES/PES
- supp_info_MRCC_PES/._supplementary_material.pdf
- supp_info_MRCC_PES/supplementary_material.pdf
- supp_info_MRCC_PES/three_body_points
- supp_info_MRCC_PES/two_body_points
- supp_info_MRCC_PES/two_body_points/ClF_mrccsd_t_5Z
- supp_info_MRCC_PES/two_body_points/ClF_mrccsd_t_cc_CBS
- supp_info_MRCC_PES/two_body_points/ClF_mrccsd_t_QZ
- supp_info_MRCC_PES/two_body_points/ClF_mrccsd_t_TZ
- supp_info_MRCC_PES/two_body_points/ClF_mrccsd_TZ
- supp_info_MRCC_PES/two_body_points/FH_mrccsd_t_5Z
- supp_info_MRCC_PES/two_body_points/FH_mrccsd_t_cc_CBS
- supp_info_MRCC_PES/two_body_points/FH_mrccsd_t_QZ
- supp_info_MRCC_PES/two_body_points/FH_mrccsd_t_TZ
- supp_info_MRCC_PES/two_body_points/FH_mrccsd_TZ
- supp_info_MRCC_PES/two_body_points/HCl_mrccsd_t_5Z
- supp_info_MRCC_PES/two_body_points/HCl_mrccsd_t_cc_CBS
- supp_info_MRCC_PES/two_body_points/HCl_mrccsd_t_QZ
- supp_info_MRCC_PES/two_body_points/HCl_mrccsd_t_TZ
- supp_info_MRCC_PES/two_body_points/HCl_mrccsd_TZ
- supp_info_MRCC_PES/two_body_points/README
- supp_info_MRCC_PES/three_body_points/README
- supp_info_MRCC_PES/three_body_points/three_body
- supp_info_MRCC_PES/three_body_points/three_body_close_TS
- supp_info_MRCC_PES/three_body_points/three_body_extra
- supp_info_MRCC_PES/three_body_points/three_body_high_R
- supp_info_MRCC_PES/three_body_points/three_body_low_lambda_subset
- supp_info_MRCC_PES/three_body_points/three_body_low_R
- supp_info_MRCC_PES/three_body_points/weights
- supp_info_MRCC_PES/PES/calc_PES.py
- supp_info_MRCC_PES/PES/coef_3b
- supp_info_MRCC_PES/PES/coef_ClF
- supp_info_MRCC_PES/PES/coef_FH
- supp_info_MRCC_PES/PES/coef_HCl
- supp_info_MRCC_PES/PES/MRCC_FHCl.py
- supp_info_MRCC_PES/PES/PES.f
