# Supplementary material for: Revisiting the F + HCl → HF + Cl reaction using a multireference coupled-cluster method
Source: Royal Society of Chemistry journal article supplement (doi:10.1039/c6cp05782a), 2016-01-01
Supplement: c6cp05782a2.tgz [file c6cp05782a2.tgz › supp_info_MRCC_PES/PES/coef_3b]

0.70381354
1.26300722
0.80590249
0.83927658
0.78713854
0.84283816
6.46017553951
-104.694570589
1113.1378338
-8851.92595228
44539.7950962
-146848.11566
335878.745553
-483559.760593
310831.36676
-48.8133768678
1052.05730964
-7077.34664133
27863.1635736
-69312.8980385
91829.7032336
-9227.76524271
-73791.3635487
34.6964981045
-4022.33455599
25154.738699
-60829.1647348
84147.590526
-104881.244367
130697.259854
725.994998158
6767.93831001
-49312.0677497
82340.9546544
-23049.9469414
16889.7854609
-3180.97864836
-4159.21011546
51040.1634984
-73705.8321998
-25771.4918634
6541.54256002
214.442289599
-21809.2245543
37560.2088291
-7981.32412022
-1872.84715473
87.2996470524
5763.07522184
2346.44544529
-1895.1946919
12.2094485212
-606.373724423
7628.79181089
-34913.5604745
31868.2774199
237194.448987
-831553.597579
1043663.26501
-464667.917502
-7.36723869899
-21.1594899265
4227.7372169
-35798.6473763
158667.798588
-357447.34566
7819.26125528
1207801.33473
-1182840.03592
100.091647334
157.860714974
-10085.6078617
86724.4067238
-348699.965609
792387.509388
-1533811.50269
1307663.07276
-667.493295639
-2294.57339948
4230.88859688
-82775.2992663
338557.467711
-324539.954599
-1367758.943
2895.44007581
13375.3502538
26843.8420385
-11449.4567491
-240039.626687
928287.106353
-8352.89018425
-38409.2607167
-72984.350711
73564.5609135
-43363.9781534
15124.6694776
59210.9227072
88898.6352913
-44247.7068521
-15837.3562547
-46974.606351
-41345.1588414
8360.01417175
15022.5269268
-1576.93286362
-118.790212953
4020.64903264
-64983.7071142
365191.535422
-760666.111486
103168.553743
1474341.45187
-1269114.43358
104.233562162
-2571.85265129
-29808.511445
93107.8405582
-313834.606206
2844512.39677
-5684928.42768
908608.585198
-1319.31481297
7119.07926436
73053.0419596
-126375.759367
-527231.417992
3392069.02576
2828290.86145
5955.50502416
-7445.79192047
-65687.6687767
444604.96735
-71234.2728675
1627604.37262
-14761.5228748
1758.85556414
68472.2305264
-218345.753224
-2235124.02943
25731.0796284
8281.59121692
-190737.746988
421960.762712
-35474.1739094
-24110.3515331
148056.105951
32672.1479952
17707.0622338
-13259.081314
4667.41239971
-22158.2553088
204216.470855
-1349279.61148
3353731.34384
-2729801.73735
-19565.8102129
588.990822014
53290.5531146
175052.189995
-439619.99525
-3116129.98404
2376469.37117
10091216.5481
6289.77033221
-140784.201979
-465563.708718
285748.260387
-6735898.31746
-20083140.3818
-35180.3618298
107083.209208
-176234.840582
-57849.9383215
5807306.37214
63427.3254175
40197.2401065
820717.61007
2121011.51089
-37662.1987235
29494.6864984
-1022385.89658
-13240.4862414
-82565.2304648
16546.1079385
-70666.6426296
290211.241465
-629567.276245
2524309.54237
-5722432.44953
3746306.88059
-33445.3906913
-512901.661407
-274109.040139
3885861.0288
5060337.99385
-16526615.9733
63347.4535997
1262042.97012
3192390.81743
9867949.05211
36222792.872
29074.4744661
-979949.974273
-2718999.24852
-14896530.423
-193650.468958
-328672.430349
837921.420277
182362.279082
698709.7436
-49999.9073025
479616.601555
-1845389.46071
2722700.31737
-3269458.4891
3340948.07926
365758.21436
2515285.19922
-1878391.16046
-8060781.74018
3999147.97972
-804084.126737
-5937874.75218
-14567506.7922
-30344544.4491
636926.123727
5272144.50733
13286744.2798
-32337.260666
-1861548.57151
-157489.954888
-1766323.52706
5233915.82203
-6308155.19092
2965279.03429
-1874132.32035
-6432290.90574
6773951.29594
2892340.97901
3381636.38903
13932685.0155
21591680.4127
-2428207.88463
-8143584.9524
686784.561359
3752296.3029
-6658274.09969
4992788.86251
5051088.17035
8180519.2411
-5758137.85985
-6434442.56152
-12739521.0492
2550393.59404
-4418260.90967
2995928.25672
-6926977.3447
-4097304.56145
4710833.6224
2273600.04115
3813103.4584
73174.4861269
-1034199.65721
3113349.29125
2635165.85418
-20026750.3238
19165753.4972
743922.54965
-1431852.18853
-12010691.172
19660538.231
-2886581.23552
1359352.47893
-12410316.1912
82021677.3862
-88559624.0306
1970308.97359
-40914040.7472
11584885.1858
960683.297769
46369667.2934
-13936945.1013
-101923.891785
1063701.03616
-4201671.10073
7031872.63686
-3161637.27118
-2017880.66269
-571359.017349
1077641.72594
10338855.4768
-46331691.1467
71947301.0843
-40711848.8651
5315169.69544
-32165067.4834
63500390.3862
-84674441.5129
73783956.6313
-4183650.73883
62273264.7425
-95857425.4282
45131955.6636
-7791754.41344
18003692.3926
-57162816.1195
-7002391.20087
14538288.839
14556795.93
-162772.191399
-2605180.97331
19429449.673
-40226137.7079
25562414.1039
3217495.03411
-12605436.6386
9417385.51546
43716921.9308
-68086241.2685
-22519426.0181
50366524.2988
6721695.44264
-76683844.1991
28391173.1209
-204063766.713
273505450.129
45081201.0218
-27952814.2188
-55449434.6727
5524272.77822
-19389172.7379
13960088.1639
8619651.8763
-8423309.93627
51891487.4788
-125815677.812
140565977.714
28184978.3454
49828746.6602
-171869711.073
-82394164.4051
62386211.4881
85668328.3633
-15963110.6309
48247113.9647
-46107478.4607
12673744.5333
-65784870.0928
46070918.9762
-6373237.65558
61438336.426
-21389656.072
14008092.333
-12069242.6216
-8588600.30454
6201800.46967
-8050921.83511
-6201334.54598
10230890.023
-67580.5010009
879936.080611
-2299750.3588
-3987620.16542
20165071.6796
-18167131.6922
-523693.664966
166364.178533
14564251.6939
-25468722.5516
9072976.50802
-1110202.69287
8832502.65635
-62231654.9353
67935613.3247
-876367.264431
31494698.8482
-8806773.23315
-1891793.1068
-36205941.686
11830247.2302
81858.2168446
-831657.338397
3187428.37987
-4948590.11123
1126232.49697
2758013.8216
451773.669513
-877928.72406
-8147409.8348
36481531.5019
-52467739.8151
25286316.487
-4248452.97171
25922590.5705
-50979156.6687
57539739.9831
-47832014.9808
3168044.60332
-47797715.8122
79507151.6953
-34198565.5755
5110521.80736
-9619007.27606
37081110.9018
3858156.45306
-12164017.7875
-10330335.4216
244691.984678
1727643.45755
-15161933.1652
30907668.4047
-18086823.3056
-2667174.01959
10616246.2625
-7648909.43193
-32749060.4596
52243446.8005
17513430.7182
-45950413.272
5498127.08728
56857181.781
-18320947.8258
145270713.932
-213534567.175
-28398442.255
26980899.8346
41020536.0877
-4978869.59615
17142908.8822
-12706819.6296
-8239890.74661
7898432.83981
-41863624.0684
96106119.8255
-109892737.909
-23099891.637
-16914001.3959
125824221.689
47996809.6274
-44342054.2383
-67912412.466
13179606.4708
-40482261.1692
40241322.7506
-13460427.9157
49063074.2147
-35635378.9356
14579446.2185
-59549169.2455
24194402.9254
-10369431.7861
10378878.9741
9297327.38435
-3918473.76794
562900.890799
4403882.95661
-8692941.38982
15301.266074
-185772.288547
415010.641616
1198074.4448
-4899014.40678
4218847.26625
90389.7908399
165868.260656
-3927414.491
7087968.15093
-3194449.59816
227826.048461
-1539981.76259
11725615.5178
-12950288.8415
33051.1450366
-6048364.43998
1662883.59353
615652.199514
6979551.73768
-2446021.47235
-16334.002656
162553.813973
-608585.236597
874080.997205
46428.5444622
-798370.679334
-89327.9551242
175140.089906
1643501.9093
-7289886.13025
9498578.76642
-3479009.34075
849928.702505
-5251140.01781
10335575.7078
-9390872.92927
7077118.0732
-594590.431646
9105507.94023
-16398074.3359
6247357.41103
-786589.344073
972153.640518
-4926426.28089
-463138.059826
1995408.53501
1832841.76775
-70938.3688185
-293633.142093
3014122.05685
-6018417.11866
3183994.5689
553145.584039
-2197438.42776
1443240.69535
6466223.59009
-10220720.0986
-3407908.39669
10326376.8887
-4001096.07277
-9520728.53885
2795065.00177
-25205649.2574
39837583.5469
4183772.67411
-5128168.47549
-7470140.01615
1097436.58325
-3725286.43997
2692757.82458
2060855.76198
-1819435.10556
8495532.15355
-17889095.218
20473474.097
4725990.06114
-1116051.33845
-20318274.777
-6146921.47467
5985892.72551
13262576.0335
-2725218.29818
8470053.84335
-8385582.44925
3379267.20932
-9584576.10182
5444649.91979
-4678543.966
15030118.5393
-5902742.334
2061949.85546
-2062354.308
-2406134.57673
814839.376799
721314.939222
-950202.309125
1948421.25049
