# Supplementary material for: Revisiting the F + HCl → HF + Cl reaction using a multireference coupled-cluster method
Source: Royal Society of Chemistry journal article supplement (doi:10.1039/c6cp05782a), 2016-01-01
Supplement: c6cp05782a2.tgz [file c6cp05782a2.tgz › supp_info_MRCC_PES/PES/coef_ClF]

4.02319052038
0.828214811115
1268.37522241
0.0195708517515
-1.87328702728
43.772595768
-1075.04282677
9313.82228535
-40910.2244575
101281.611168
-134659.492025
76287.9923639
