# Supplementary material for: Revisiting the F + HCl → HF + Cl reaction using a multireference coupled-cluster method
Source: Royal Society of Chemistry journal article supplement (doi:10.1039/c6cp05782a), 2016-01-01
Supplement: c6cp05782a2.tgz [file c6cp05782a2.tgz › supp_info_MRCC_PES/PES/coef_FH]

2.95384912493
1.04109111033
12.2127364984
-0.0188076160958
-2.44497166692
-107.447596457
1342.03730382
-7650.72319425
23994.7739693
-40254.9093415
28977.2918162
-1336.82098383
