# Supplementary material for: Revisiting the F + HCl → HF + Cl reaction using a multireference coupled-cluster method
Source: Royal Society of Chemistry journal article supplement (doi:10.1039/c6cp05782a), 2016-01-01
Supplement: c6cp05782a2.tgz [file c6cp05782a2.tgz › supp_info_MRCC_PES/PES/coef_HCl]

1.22793311074
1.07868626545
19.5916084168
-0.166494034879
-49.4728386621
566.854408522
-4480.19703024
19873.535992
-41838.6302574
-18216.5094038
255001.007451
-353280.075309
