# Supplementary material for: Revisiting the F + HCl → HF + Cl reaction using a multireference coupled-cluster method
Source: Royal Society of Chemistry journal article supplement (doi:10.1039/c6cp05782a), 2016-01-01
Supplement: c6cp05782a2.tgz [file c6cp05782a2.tgz › supp_info_MRCC_PES/three_body_points/README]

The files in this directory have the ab initio points used to fit the two body terms.

The columns are:
  R_FH  interatomic distance, in a.u.
  R_HCl interatomic distance, in a.u.
  R_ClF interatomic distance, in a.u.
  Three-body contribution
  A number associated to that point in that file *

The file 'weight' has the weights of some points of the file 'three-body',
based on the column * described above.
