# Supplementary material for: Revisiting the F + HCl → HF + Cl reaction using a multireference coupled-cluster method
Source: Royal Society of Chemistry journal article supplement (doi:10.1039/c6cp05782a), 2016-01-01
Supplement: c6cp05782a2.tgz [file c6cp05782a2.tgz › supp_info_MRCC_PES/three_body_points/three_body]

5.01468 2.21483 7.22951 0.00271994526579 1
4.86471 2.21171 7.07642 0.00382642255104 2
4.66478 2.20653 6.87131 0.00535138932114 3
4.51485 2.20179 6.71664 0.00750764792966 4
4.36495 2.19627 6.56122 0.0109089735824 5
4.21508 2.18999 6.40507 0.0145952085465 6
4.01531 2.18058 6.19589 0.0211800787192 7
3.8655 2.17301 6.03851 0.0276737487175 8
3.71569 2.16536 5.88105 0.0357877897428 9
3.51592 2.15588 5.6718 0.0497155712376 10
3.31605 2.14871 5.46476 0.0675588462411 11
3.16607 2.14607 5.31214 0.0840568224503 12
1.9636 2.40768 4.37128 0.254912140643 13
1.84764 2.50263 4.35027 0.256829466814 14
1.71774 2.6543 4.37204 0.244818958578 15
1.61789 2.82733 4.44522 0.219548076147 16
1.54472 3.01332 4.55804 0.187082333667 17
1.50392 3.15764 4.66156 0.162632881727 18
1.46389 3.35355 4.81744 0.132244934303 19
1.44215 3.50196 4.94411 0.11185501994 20
1.42131 3.70085 5.12216 0.0882191136402 21
1.41029 3.85045 5.26074 0.0729446654313 22
1.40004 4.05018 5.45022 0.0559925565707 23
1.3948 4.20009 5.59489 0.0454694418123 24
1.39011 4.40003 5.79014 0.0337060019252 25
1.38724 4.60001 5.98725 0.0250260999339 26
1.38554 4.8 6.18554 0.0181331622271 27
1.38477 4.95 6.33477 0.014088116263 28
5.19812 2.21823 7.11635 0.00185075995018 29
4.99815 2.21517 6.91332 0.0029836417694 30
4.84817 2.21233 6.7605 0.0041879812327 31
4.64823 2.20776 6.55599 0.00645041120947 32
4.49828 2.20373 6.40201 0.00880134469183 33
4.29837 2.19766 6.19603 0.0131042556285 34
4.14845 2.19276 6.04121 0.0174517545223 35
3.94856 2.18619 5.83475 0.025153017566 36
3.74864 2.18045 5.62909 0.0355328033461 37
3.54868 2.17682 5.4255 0.0491641735864 38
3.39868 2.17654 5.27522 0.0616578536483 39
3.19874 2.18107 5.07981 0.0818256121441 40
3.04898 2.18946 4.93844 0.099644681094 41
2.89963 2.20333 4.80296 0.119595261505 42
2.70179 2.23238 4.63417 0.14839347455 43
2.50671 2.27621 4.48292 0.177347513577 44
2.36352 2.32079 4.38431 0.199890578969 45
2.1795 2.39883 4.27833 0.226216188289 46
2.00808 2.5015 4.20958 0.241438309476 47
1.85588 2.63088 4.18676 0.242828720392 48
1.72891 2.78509 4.214 0.229480140641 49
1.65173 2.91362 4.26535 0.212029197745 50
1.57137 3.09662 4.36799 0.183363887343 51
1.5127 3.28774 4.50044 0.153089070099 52
1.47081 3.48326 4.65407 0.124435242247 53
1.44144 3.68107 4.82251 0.099099216067 54
1.4212 3.88003 5.00123 0.0769768189875 55
1.40752 4.07955 5.18707 0.0589397819612 56
1.40037 4.22938 5.32975 0.0477259302359 57
1.39519 4.37929 5.47448 0.038303051561 58
1.39052 4.57923 5.66975 0.0281830719932 59
1.38821 4.72922 5.81743 0.0221648239337 60
1.38622 4.92921 6.01543 0.0158730034208 61
1.38506 5.1292 6.21426 0.0111851193876 62
5.34723 2.22038 6.96761 0.00138052499792 63
5.14724 2.21814 6.76538 0.0022791977097 64
4.94726 2.21536 6.56262 0.00363052576309 65
4.79728 2.21291 6.41019 0.00505961245926 66
4.59732 2.20923 6.20655 0.00772852415018 67
4.39736 2.2053 6.00266 0.0115772792199 68
4.24738 2.20245 5.84983 0.0154838399118 69
4.04741 2.19937 5.64678 0.0229100553683 70
3.89741 2.19816 5.49557 0.0294912409318 71
3.74741 2.19854 5.34595 0.0378245725108 72
3.54746 2.20275 5.15021 0.0519638345055 73
3.34774 2.21299 4.96073 0.0699380642457 74
3.1983 2.2259 4.8242 0.0860481259845 75
3.0 2.25176 4.65176 0.110853321624 76
2.85245 2.2787 4.53115 0.131450222165 77
2.65819 2.32609 4.38428 0.159680147176 78
2.51514 2.37117 4.28631 0.179686123046 79
2.32957 2.44557 4.17514 0.208469553872 80
2.19584 2.51344 4.10928 0.225062542704 81
2.02818 2.62223 4.05041 0.238442729165 82
1.9134 2.71869 4.03209 0.239906867988 83
1.77951 2.86698 4.04649 0.229689369067 84
1.67072 3.03459 4.10531 0.207900140878 85
1.58688 3.21602 4.2029 0.179537544519 86
1.52471 3.40602 4.33073 0.149448787072 87
1.48965 3.55185 4.4415 0.127738676181 88
1.45495 3.74879 4.60374 0.101477877645 89
1.43072 3.9473 4.77802 0.0790201605505 90
1.41411 4.1466 4.96071 0.0599499079724 91
1.40295 4.34628 5.14923 0.0448910342671 92
1.39715 4.49617 5.29332 0.0357472751886 93
1.39187 4.6961 5.48797 0.026022974809 94
1.38853 4.89607 5.6846 0.0186539337708 95
1.38649 5.09606 5.88255 0.0131651164944 96
1.38552 5.24606 6.03158 0.0100294233756 97
5.49526 2.22201 6.81727 0.00103758594913 98
5.34526 2.22084 6.6661 0.00155526434754 99
5.14527 2.21901 6.46428 0.00255014550302 100
4.94528 2.21691 6.26219 0.00403991319047 101
4.74529 2.21469 6.05998 0.00624091175015 102
4.5453 2.21267 5.85797 0.00944273988574 103
4.34531 2.21141 5.65672 0.0140210687172 104
4.19531 2.21147 5.50678 0.0186366151336 105
3.99532 2.21386 5.30918 0.0268003948752 106
3.79543 2.22031 5.11574 0.0379729437214 107
3.64568 2.22892 4.9746 0.0483245020028 108
3.44652 2.247 4.79352 0.0653729048155 109
3.29781 2.26658 4.66439 0.0807129467118 110
3.15 2.29208 4.54208 0.0981005258751 111
2.95493 2.33606 4.39099 0.123997812192 112
2.8106 2.37688 4.28748 0.144751493238 113
2.66838 2.42453 4.19291 0.165451091934 114
2.48281 2.49901 4.08182 0.192185664394 115
2.34746 2.56363 4.01109 0.21141392744 116
2.17401 2.66306 3.93707 0.230701781023 117
2.05116 2.74906 3.90022 0.23865009268 118
1.90098 2.88093 3.88191 0.238362488311 119
1.77124 3.03291 3.90415 0.224883091917 120
1.66544 3.20244 3.96788 0.20109783566 121
1.58358 3.38478 4.06836 0.171871165052 122
1.53615 3.52705 4.1632 0.149054659588 123
1.48826 3.72118 4.30944 0.120060278819 124
1.46158 3.86878 4.43036 0.100359563297 125
1.43546 4.06704 4.6025 0.0775374497098 126
1.42132 4.21637 4.73769 0.0631363984118 127
1.41075 4.366 4.87675 0.050151841162 128
1.4008 4.56575 5.06655 0.0368189795297 129
1.39428 4.76564 5.25992 0.026590140636 130
1.39011 4.96559 5.4557 0.0189046395083 131
1.38803 5.11558 5.60361 0.0144887667913 132
1.38623 5.31557 5.8018 0.0100201973778 133
1.38538 5.46557 5.95095 0.00751258846208 134
5.64232 2.22323 6.66555 0.000786057578082 135
5.44233 2.22213 6.46446 0.00139781995602 136
5.29233 2.22121 6.31354 0.00205701333665 137
5.14233 2.22026 6.16259 0.0029531341863 138
4.94234 2.21912 5.96146 0.0046534042516 139
4.79234 2.21854 5.81088 0.00644147019684 140
4.64234 2.21846 5.6608 0.00881495509263 141
4.49234 2.2192 5.51154 0.0119369525785 142
4.34235 2.2212 5.36355 0.0160003323343 143
4.14244 2.22682 5.16926 0.0232627565907 144
3.99262 2.23417 5.02679 0.0303982511866 145
3.84302 2.24512 4.88814 0.039605690329 146
3.69382 2.26055 4.75437 0.0502129734199 147
3.49595 2.2895 4.58545 0.0674587192044 148
3.34876 2.31835 4.46711 0.0827878458238 149
3.15478 2.3669 4.32168 0.105983681915 150
3.01135 2.41079 4.22214 0.125091814792 151
2.86989 2.46066 4.13055 0.145176157681 152
2.68454 2.53572 4.02026 0.172322282969 153
2.54814 2.59812 3.94626 0.192034506229 154
2.37044 2.68984 3.86028 0.216116023544 155
2.19919 2.79307 3.79226 0.234343610747 156
2.0769 2.87989 3.75679 0.242077087881 157
1.92579 3.01072 3.73651 0.24181106397 158
1.79327 3.16031 3.75358 0.228675790421 159
1.70873 3.28414 3.79287 0.211802164354 160
1.61692 3.46166 3.87858 0.183477558132 161
1.56285 3.60154 3.96439 0.160322235965 162
1.50762 3.79369 4.10131 0.130039346712 163
1.47659 3.94043 4.21702 0.109019087409 164
1.45264 4.0885 4.34114 0.0900992670965 165
1.4293 4.28711 4.51641 0.0685575832217 166
1.41674 4.43658 4.65332 0.0542492685332 167
1.40737 4.58629 4.79366 0.0429032064403 168
1.39861 4.7861 4.98471 0.0308686163962 169
1.3929 4.98601 5.17891 0.0218274549918 170
1.38926 5.18598 5.37524 0.0151799789212 171
1.38747 5.33597 5.52344 0.0114345998626 172
1.38591 5.53596 5.72187 0.00771583856486 173
5.78866 2.22411 6.51277 0.000608036638944 174
5.63866 2.22356 6.36222 0.00099079272856 175
5.48866 2.223 6.21166 0.00151799792176 176
5.33866 2.22249 6.06115 0.00224022519737 177
5.18866 2.22212 5.91078 0.00322407586587 178
5.03866 2.22204 5.7607 0.00455588498525 179
4.88866 2.22247 5.61113 0.00634534708737 180
4.68867 2.22438 5.41305 0.00968232745518 181
4.5387 2.22738 5.26608 0.0131163033878 182
4.33884 2.23458 5.07342 0.0193095248073 183
4.1891 2.24336 4.93246 0.0254413073425 184
3.98991 2.26125 4.75116 0.0359914231769 185
3.84116 2.28052 4.62168 0.045902936739 186
3.64431 2.3157 4.46001 0.0623226692298 187
3.49829 2.34997 4.34826 0.0763517581187 188
3.35407 2.39118 4.24525 0.0920031358338 189
3.16499 2.45627 4.12126 0.115214856729 190
2.97957 2.53118 4.01075 0.140313534264 191
2.84265 2.59244 3.93509 0.159914692738 192
2.70736 2.65722 3.86458 0.180399336054 193
2.5295 2.74867 3.77817 0.205452746762 194
2.35528 2.84684 3.70212 0.227784962043 195
2.22814 2.92643 3.65457 0.240683024169 196
2.06603 3.04346 3.60949 0.250006196092 197
1.91679 3.17644 3.59323 0.247168084918 198
1.78592 3.32748 3.6134 0.231991430823 199
1.67766 3.49545 3.67311 0.207066064849 200
1.61201 3.63027 3.74228 0.184574575024 201
1.55881 3.77048 3.82929 0.16080876597 202
1.50458 3.96292 3.9675 0.129923619059 203
1.47417 4.10979 4.08396 0.108553516739 204
1.44424 4.30751 4.25175 0.0834902541874 205
1.42797 4.45662 4.38459 0.0675491155653 206
1.41573 4.60612 4.52185 0.0529499612105 207
1.40416 4.80578 4.70994 0.0381945019234 208
1.39812 4.95566 4.85378 0.0294871618981 209
1.39259 5.15558 5.04817 0.0205255774217 210
1.38908 5.35555 5.24463 0.0140153789953 211
1.38734 5.50554 5.39288 0.010393667846 212
1.38584 5.70553 5.59137 0.00684759358042 213
5.93456 2.22471 6.35927 0.000502073531023 214
5.78456 2.22435 6.20891 0.000867196215091 215
5.63456 2.22403 6.05859 0.00137418555628 216
5.48456 2.22382 5.90838 0.00207347970264 217
5.33456 2.22385 5.75841 0.00303135988889 218
5.18456 2.22428 5.60884 0.0043333236647 219
5.03456 2.22536 5.45992 0.00608701135678 220
4.83459 2.22843 5.26302 0.00935839288728 221
4.68464 2.23259 5.11723 0.0127175230175 222
4.53478 2.23905 4.97383 0.017050392172 223
4.33526 2.25266 4.78792 0.0246635875748 224
4.13642 2.27409 4.61051 0.0347494123769 225
3.93899 2.30583 4.44482 0.0476019432388 226
3.79243 2.33774 4.33017 0.0591254658229 227
3.6 2.39208 4.19208 0.0771575261045 228
3.45841 2.44157 4.09998 0.0920611724776 229
3.27348 2.51767 3.99115 0.113699155242 230
3.09237 2.60247 3.89484 0.137192244761 231
2.95832 2.66979 3.82811 0.155736859487 232
2.78111 2.76251 3.74362 0.182582625464 233
1.87543 3.37758 3.45301 0.253437648815 234
1.75077 3.53377 3.48454 0.234196860635 235
1.67245 3.66163 3.53408 0.213956160555 236
1.58864 3.84308 3.63172 0.182609395982 237
1.53992 3.98492 3.72484 0.158197479671 238
1.4907 4.17871 3.86941 0.126921662181 239
1.45569 4.37559 4.03128 0.0988927852122 240
1.43656 4.52436 4.16092 0.0806299793437 241
1.42212 4.67366 4.29578 0.0649003796977 242
1.40838 4.87318 4.48156 0.0463964015629 243
1.39925 5.07297 4.67222 0.0328985087946 244
1.39329 5.27288 4.86617 0.022796334625 245
1.39029 5.42285 5.01314 0.0170580877499 246
1.38763 5.62283 5.21046 0.0113561782914 247
1.386 5.82282 5.40882 0.00737205839815 248
6.08034 2.22508 6.20542 0.000481533614887 249
5.93034 2.22483 6.05517 0.000866629197248 250
5.78034 2.22466 5.905 0.00140469347242 251
5.63034 2.22465 5.75499 0.00214968606072 252
5.48034 2.22494 5.60528 0.00317143726197 253
5.33034 2.22571 5.45605 0.00455844842012 254
5.13035 2.228 5.25835 0.00716668934706 255
4.93041 2.23259 5.063 0.010932737844 256
4.78052 2.23837 4.91889 0.0147335818701 257
4.63077 2.24699 4.77776 0.0195479319869 258
4.43156 2.26456 4.59612 0.0277993297667 259
4.2828 2.28375 4.46655 0.0355137485549 260
4.13502 2.3094 4.34442 0.044682278263 261
3.98875 2.34258 4.23133 0.0551334693368 262
3.79715 2.39975 4.0969 0.0710992356113 263
3.6567 2.45237 4.00907 0.0844428722883 264
3.47416 2.53401 3.90817 0.103756515239 265
3.29628 2.6254 3.82168 0.126952206688 266
3.16488 2.69775 3.76263 0.142447864851 267
1.62398 3.91442 3.4384 0.210838598354 268
1.56776 4.05344 3.5212 0.186026930273 269
1.5104 4.24496 3.65536 0.152643886191 270
1.46931 4.44065 3.80996 0.121389993668 271
1.44675 4.58894 3.93569 0.100371368694 272
1.42497 4.78773 4.1127 0.0750479039594 273
1.41336 4.93728 4.25064 0.0596253275754 274
1.40245 5.13698 4.43943 0.0428761539261 275
1.39531 5.33685 4.63216 0.0300519951399 276
1.39073 5.53679 4.82752 0.0205384889661 277
1.38845 5.68678 4.97523 0.0151795022629 278
1.38647 5.88677 5.17324 0.00990205615991 279
1.3853 6.08676 5.37206 0.00625778277881 280
6.2263 2.22522 6.05152 0.000572879254347 281
6.0763 2.22502 5.90132 0.00102208723142 282
5.9263 2.22493 5.75123 0.00164994092162 283
5.7763 2.22502 5.60132 0.00251738584767 284
5.6263 2.22545 5.45175 0.0037014389657 285
5.42631 2.22691 5.25322 0.00593928719406 286
5.27632 2.22908 5.1054 0.00826183314882 287
5.07639 2.23425 4.91064 0.0124682570343 288
4.87661 2.24343 4.72004 0.0182442382496 289
4.6772 2.25869 4.53589 0.0258898158128 290
4.47867 2.28267 4.36134 0.0356119727564 291
4.33087 2.30822 4.23909 0.0442494727484 292
4.13642 2.35477 4.09119 0.0575812120866 293
3.99349 2.40022 3.99371 0.0687485980657 294
3.85385 2.45494 3.90879 0.0807607329075 295
3.71789 2.51826 3.83615 0.0934941467169 296
3.54203 2.61344 3.75547 0.111526099802 297
3.37062 2.71648 3.6871 0.1309441145 298
1.50821 4.40487 3.51308 0.169959193618 299
1.47624 4.55141 3.62765 0.143664053973 300
1.45176 4.69939 3.75115 0.119988448102 301
1.42814 4.89797 3.92611 0.0919807761067 302
1.41557 5.04744 4.06301 0.0739702893643 303
1.40628 5.19715 4.20343 0.0585770094034 304
1.39768 5.39696 4.39464 0.0419207543909 305
1.39331 5.5469 4.54021 0.0320553729346 306
1.3894 5.74686 4.73626 0.0219007774029 307
1.38699 5.94684 4.93383 0.0145583196176 308
1.38585 6.09684 5.08269 0.0105100804533 309
1.38509 6.24684 5.23193 0.00744377214764 310
6.37264 2.22515 5.89779 0.000816812158101 311
6.22264 2.22495 5.74759 0.00138417660994 312
6.07264 2.22485 5.59749 0.00217239139883 313
5.92264 2.22496 5.4476 0.00325269524445 314
5.77264 2.22541 5.29805 0.00471306503383 315
5.57265 2.22696 5.09961 0.00743355345232 316
5.37268 2.2303 4.90298 0.0113020822727 317
5.22274 2.23468 4.75742 0.0151406531686 318
5.02298 2.24436 4.56734 0.0217363584189 319
4.82365 2.26049 4.38414 0.0294842395893 320
4.67474 2.27854 4.25328 0.0369930145593 321
4.47781 2.31323 4.09104 0.0495674090223 322
4.28419 2.3631 3.94729 0.0629310651221 323
4.1424 2.41196 3.85436 0.0737107095261 324
3.95951 2.49272 3.75223 0.0887126923203 325
3.82745 2.56382 3.69127 0.100290030528 326
3.65747 2.66916 3.62663 0.116241908729 327
6.54047 2.22491 5.76538 0.00118501438136 335
6.39047 2.22463 5.6151 0.00190568986483 336
6.24047 2.22445 5.46492 0.00289802290031 337
6.09047 2.22444 5.31491 0.00424520418368 338
5.94047 2.22475 5.16522 0.00604665754925 339
5.79047 2.2256 5.01607 0.00841674668745 340
5.59049 2.2281 4.81859 0.0126782323585 341
5.44053 2.23159 4.67212 0.016864327746 342
5.29063 2.23717 4.5278 0.0220240779157 343
5.09101 2.24935 4.34036 0.0298129683565 344
4.89204 2.26945 4.16149 0.0400725269592 345
4.69456 2.30085 3.99541 0.0533497630563 346
4.50009 2.3473 3.84739 0.0664902795936 347
4.31091 2.41194 3.72285 0.0805549218259 348
4.17399 2.47312 3.64711 0.0910796550257 349
4.0421 2.54451 3.58661 0.101370838978 350
3.87391 2.65266 3.52657 0.114767158886 351
6.65545 2.22433 5.57978 0.00208976075106 352
6.50545 2.22394 5.42939 0.00314538115665 353
6.35545 2.22364 5.27909 0.00457546088267 354
6.20545 2.22351 5.12896 0.00648429223863 355
6.05545 2.22373 4.97918 0.00899088226534 356
5.90545 2.22451 4.82996 0.0122255689042 357
5.70547 2.22705 4.63252 0.0178967466881 358
5.55551 2.23074 4.48625 0.0233206918927 359
5.40563 2.23673 4.34236 0.0298098876869 360
5.20608 2.25001 4.15609 0.0403813236366 361
5.00733 2.27212 3.97945 0.0527562139435 362
4.81042 2.30685 3.81727 0.0662154978576 363
4.66503 2.34365 3.70868 0.0770518832042 364
4.47637 2.40976 3.58613 0.0913752905991 365
4.34033 2.47287 3.5132 0.101450811393 366
4.16776 2.57379 3.44155 0.113507090064 367
6.84377 2.22371 5.46748 0.00295591766659 368
6.69377 2.22313 5.3169 0.00430309243128 369
6.54377 2.22259 5.16636 0.00610911581867 370
6.39377 2.22215 5.01592 0.00849440384536 371
6.24377 2.22196 4.86573 0.0115927338798 372
6.09377 2.22224 4.71601 0.0155443623307 373
5.94377 2.2233 4.56707 0.0204847578295 374
5.74381 2.22673 4.37054 0.0288014101562 375
5.59389 2.23171 4.2256 0.0364204342789 376
5.44411 2.23978 4.08389 0.0452224576383 377
5.24492 2.25754 3.90246 0.0585240261294 378
5.04711 2.28679 3.7339 0.0734109768828 379
4.90061 2.31892 3.61953 0.0846669174202 380
4.7569 2.36178 3.51868 0.0963452974082 381
4.57196 2.43762 3.40958 0.110607936748 382
4.39724 2.53473 3.33197 0.12239915023 383
6.97121 2.22259 5.2938 0.00485317184333 384
6.82121 2.22177 5.14298 0.00681332867204 385
6.67121 2.22094 4.99215 0.00939745470676 386
6.52121 2.22018 4.84139 0.0127504480268 387
6.37121 2.21964 4.69085 0.0170850996064 388
6.22121 2.21956 4.54077 0.02241089241 389
6.02122 2.2208 4.34202 0.031382158734 390
5.87124 2.22344 4.19468 0.0395984687894 391
5.67138 2.23077 4.00215 0.0525192134389 392
5.4719 2.24499 3.81689 0.0675563309738 393
5.27349 2.26985 3.64334 0.0832341352047 394
5.12622 2.29825 3.52447 0.0955936443859 395
4.93393 2.35288 3.38681 0.112079775858 396
7.12 2.22124 5.14124 0.00750640794754 397
6.92001 2.2197 4.93971 0.0113802716958 398
6.77001 2.21847 4.78848 0.0152705383622 399
6.57002 2.21696 4.58698 0.0221583208351 400
6.42002 2.21618 4.4362 0.0287808504834 401
6.27002 2.21604 4.28606 0.036788950436 402
6.12002 2.21706 4.13708 0.0461803374307 403
5.92008 2.22147 3.94155 0.0606370127382 404
5.00132 2.27522 7.27654 0.00277410772324 405
4.85136 2.27169 7.12305 0.00390301307474 406
4.70142 2.26743 6.96885 0.00541546101279 407
4.50154 2.26047 6.76201 0.0082256173755 408
4.35167 2.25423 6.6059 0.0111110868213 409
4.15191 2.24459 6.3965 0.0163234322827 410
4.00212 2.23653 6.23865 0.0215226167363 411
3.80245 2.22513 6.02758 0.0306200028569 412
3.65269 2.21663 5.86932 0.0394035940952 413
3.50289 2.20884 5.71173 0.0502552459865 414
3.30305 2.20095 5.504 0.0681536012919 415
3.10308 2.19812 5.3012 0.0902038046344 416
2.90317 2.20341 5.10658 0.11534059069 417
2.75362 2.21492 4.96854 0.136641945612 418
2.22247 2.34795 4.57042 0.217974460637 419
2.09089 2.41975 4.51064 0.23189590678 420
1.97134 2.51013 4.48147 0.237294491287 421
1.83669 2.65755 4.49424 0.230127440359 422
1.75621 2.78401 4.54022 0.215872854921 423
1.67432 2.96629 4.64061 0.190101996597 424
1.61619 3.15756 4.77375 0.15510668478 425
1.57584 3.3534 4.92924 0.126707663498 426
1.54831 3.55147 5.09978 0.10151968762 427
1.52988 3.75061 5.28049 0.0799898436435 428
1.51781 3.95024 5.46805 0.0620474924526 429
1.51011 4.15009 5.6602 0.0473927411185 430
1.50535 4.35003 5.85538 0.0356387908548 431
1.50252 4.55001 6.05253 0.0263756333507 432
1.50092 4.75 6.25092 0.0192026258867 433
1.50023 4.9 6.40023 0.0149673106054 434
1.49983 5.05 6.54983 0.0115505641269 435
5.19779 2.27922 7.17701 0.001821344422 436
5.04781 2.27671 7.02452 0.0026187424509 437
4.89784 2.27369 6.87153 0.00369859206736 438
4.6979 2.26876 6.66666 0.00573376988537 439
4.49799 2.26275 6.46074 0.0087030664401 440
4.29812 2.25576 6.25388 0.0129600651598 441
4.09826 2.24808 6.04634 0.0189449518034 442
3.89841 2.24037 5.83878 0.0271688662998 443
3.69853 2.2337 5.63223 0.0381707965875 444
3.54856 2.23029 5.47885 0.0485475419122 445
3.34857 2.22949 5.27806 0.0655391548064 446
3.14867 2.23522 5.08389 0.0864024476667 447
2.99903 2.24552 4.94455 0.10448779225 448
2.85 2.26244 4.81244 0.124443799297 449
2.70212 2.28746 4.68958 0.145248243754 450
2.55622 2.32217 4.57839 0.165695633451 451
2.36695 2.38646 4.45341 0.192832098423 452
2.18787 2.47513 4.363 0.21423999745 453
2.02533 2.59126 4.31659 0.223311093021 454
1.91851 2.69642 4.31493 0.221046832443 455
1.80011 2.85731 4.35742 0.206296612001 456
1.70942 3.03537 4.44479 0.182395201292 457
1.65755 3.17607 4.53362 0.161750772488 458
1.60588 3.36921 4.67509 0.133969886709 459
1.57751 3.51649 4.794 0.114391676199 460
1.55013 3.71458 4.96471 0.0906882717767 461
1.53555 3.86387 5.09942 0.075292167553 462
1.5219 4.06339 5.28529 0.0578517400296 463
1.51489 4.21323 5.42812 0.0469600971522 464
1.50856 4.41313 5.62169 0.0350621379346 465
1.50465 4.61309 5.81774 0.0257669146078 466
1.50278 4.76308 5.96586 0.0202393062046 467
1.50123 4.96307 6.1643 0.0144605332054 468
1.50055 5.11307 6.31362 0.0111126017894 469
5.3472 2.28157 7.02877 0.00134520815904 470
5.19721 2.27971 6.87692 0.00197305401646 471
4.99724 2.27666 6.6739 0.00317545457286 472
4.84726 2.27393 6.52119 0.00445117941203 473
4.64731 2.2697 6.31701 0.00684237956423 474
4.49735 2.26619 6.16354 0.0093203283323 475
4.34739 2.26253 6.00992 0.0125591953624 476
4.14745 2.25785 5.8053 0.0183831981128 477
3.94748 2.25423 5.60171 0.0263885244803 478
3.74749 2.25298 5.40047 0.037198286468 479
3.5975 2.25464 5.25214 0.0472985739077 480
3.44758 2.25952 5.1071 0.0594405266997 481
3.29786 2.2686 4.96646 0.0737621891607 482
3.09894 2.28908 4.78802 0.096187275411 483
2.95072 2.31209 4.66281 0.115175006477 484
2.80391 2.34278 4.54669 0.135277608406 485
2.61157 2.39736 4.40893 0.161287243738 486
2.42519 2.46969 4.29488 0.186781505406 487
2.24804 2.56227 4.21031 0.207833466135 488
2.12396 2.64645 4.17041 0.216834196058 489
1.97475 2.77933 4.15408 0.217824599934 490
1.87794 2.8938 4.17174 0.209977008894 491
1.79557 3.01907 4.21464 0.195891564236 492
1.70802 3.19873 4.30675 0.17093850394 493
1.64311 3.3878 4.43091 0.143336297553 494
1.60663 3.53328 4.53991 0.123020926202 495
1.57853 3.68061 4.65914 0.104076751825 496
1.55125 3.87872 4.82997 0.0817214501547 497
1.53265 4.07784 5.01049 0.0625759296074 498
1.52288 4.22752 5.1504 0.0507284215397 499
1.51576 4.37735 5.29311 0.0407292566099 500
1.50929 4.57724 5.48653 0.029960612163 501
1.50608 4.72721 5.63329 0.0235493381339 502
1.50328 4.92719 5.83047 0.0168470489165 503
1.50163 5.12718 6.02881 0.0118571350373 504
1.50088 5.27718 6.17806 0.00900728406596 505
5.49556 2.28336 6.87892 0.000996105389241 506
5.29557 2.2815 6.67707 0.00170777282855 507
5.09558 2.27923 6.47481 0.0027836048028 508
4.8956 2.27659 6.27219 0.00439050320747 509
4.69562 2.27374 6.06936 0.00675712530981 510
4.49564 2.27102 5.86666 0.0101869823845 511
4.29565 2.26905 5.6647 0.0150699081557 512
4.14565 2.26863 5.51428 0.019970766008 513
3.94566 2.27054 5.3162 0.0288173994862 514
3.79572 2.27476 5.17048 0.0370697755453 515
3.59603 2.28572 4.98175 0.051019559104 516
3.39696 2.3048 4.80176 0.0686720002223 517
3.24844 2.32575 4.67419 0.0843293056239 518
3.05216 2.36399 4.51615 0.108073730173 519
2.85888 2.41525 4.37413 0.134027612089 520
2.66984 2.48039 4.25023 0.159679080764 521
2.53172 2.53885 4.17057 0.177009635941 522
2.35408 2.6306 4.08468 0.199988309359 523
2.18668 2.73987 4.02655 0.214269303401 524
2.03387 2.86868 4.00255 0.217519490924 525
1.93191 2.97861 4.01052 0.21180894597 526
1.81622 3.14154 4.05776 0.194342147749 527
1.7249 3.31931 4.14421 0.169461468489 528
1.67141 3.45941 4.23082 0.148724002883 529
1.61711 3.65182 4.36893 0.12122703044 530
1.58683 3.79872 4.48555 0.102074603564 531
1.56363 3.94691 4.61054 0.08478761104 532
1.54125 4.14564 4.78689 0.0650449440253 533
1.52612 4.34505 4.97117 0.0483942505413 534
1.5161 4.5448 5.1609 0.0356189376905 535
1.50962 4.74469 5.35431 0.0257839251956 536
1.50638 4.89466 5.50104 0.0200229136813 537
1.50355 5.09464 5.69819 0.0140934555001 538
1.50185 5.29463 5.89648 0.0097552306313 539
1.50107 5.44463 6.0457 0.00731364336865 540
5.64296 2.28471 6.72767 0.000738564320223 541
5.49296 2.28374 6.5767 0.00115708256494 542
5.34296 2.28264 6.4256 0.00173076499097 543
5.14297 2.28103 6.224 0.00283095511074 544
4.99297 2.27979 6.07276 0.0040011423783 545
4.79298 2.27836 5.87134 0.00620402760863 546
4.64298 2.27771 5.72069 0.00850051909863 547
4.49298 2.27777 5.57075 0.0115226449151 548
4.29299 2.27974 5.37273 0.0170103954694 549
4.09307 2.28515 5.17822 0.0246421313146 550
3.94325 2.29256 5.03581 0.0321057110323 551
3.74391 2.30857 4.85248 0.0447842214879 552
3.59498 2.3264 4.72138 0.0565377884459 553
3.39777 2.35953 4.5573 0.0752885194732 554
3.20295 2.4046 4.40755 0.0971451247739 555
3.05894 2.44655 4.30549 0.115227449528 556
2.87037 2.51309 4.18346 0.140611417398 557
2.68628 2.59118 4.07746 0.165580698884 558
2.50744 2.68064 3.98808 0.188438907285 559
2.33534 2.78244 3.91778 0.207430355407 560
2.21228 2.86816 3.88044 0.216534205929 561
2.0595 2.99706 3.85656 0.219502163643 562
1.95616 3.10571 3.86187 0.213751722012 563
1.86471 3.22453 3.88924 0.201684645791 564
1.76329 3.39673 3.96002 0.178328829608 565
1.70257 3.53384 4.03641 0.157782583008 566
1.63997 3.7237 4.16367 0.129514206835 567
1.60463 3.86946 4.27409 0.109348830795 568
1.56974 4.06636 4.4361 0.085203489505 569
1.55075 4.21515 4.5659 0.0695953443275 570
1.53259 4.41431 4.7469 0.0522790045095 571
1.52043 4.61394 4.93437 0.0376073591028 572
1.51247 4.81378 5.12625 0.0269853461775 573
1.50738 5.01371 5.32109 0.0190363154852 574
1.50486 5.16369 5.46855 0.0144931590608 575
1.50312 5.31368 5.6168 0.0109283544643 576
1.50164 5.51367 5.81531 0.00737886949756 577
5.78957 2.28569 6.57526 0.000553350240964 578
5.63957 2.28501 6.42458 0.000916776537904 579
5.48957 2.28428 6.27385 0.001417712091 580
5.33957 2.28355 6.12312 0.00210436331046 581
5.18957 2.2829 5.97247 0.00304033104546 582
5.03957 2.28247 5.82204 0.00430821714946 583
4.83958 2.28261 5.62219 0.00670087028232 584
4.68958 2.28365 5.47323 0.00919881389373 585
4.48961 2.28714 5.27675 0.0137873344115 586
4.28975 2.29437 5.08412 0.020245020632 587
4.14002 2.30336 4.94338 0.026619996629 588
3.94089 2.3219 4.76279 0.0375459495209 589
3.74291 2.35004 4.59295 0.051941351479 590
3.59568 2.37867 4.47435 0.0644560121535 591
3.45 2.41437 4.36437 0.0786617570091 592
3.30626 2.45722 4.26348 0.0945074624768 593
3.11806 2.52481 4.14287 0.117483664653 594
2.9339 2.60275 4.03665 0.141799883938 595
2.79831 2.66689 3.9652 0.160229929049 596
2.66488 2.73541 3.90029 0.177978511844 597
2.49071 2.83369 3.8244 0.199488579904 598
2.32226 2.94144 3.7637 0.216108510748 599
2.20137 3.03021 3.73158 0.223500937456 600
2.05094 3.16186 3.7128 0.223746628887 601
1.91758 3.31073 3.72831 0.212321608204 602
1.80583 3.47641 3.78224 0.191148615118 603
1.71745 3.65568 3.87313 0.164062844866 604
1.65087 3.84418 3.99505 0.135093732668 605
1.60247 4.03818 4.14065 0.107550425739 606
1.56822 4.23519 4.30341 0.0831961160231 607
1.54449 4.43376 4.47825 0.0628369038449 608
1.52839 4.6331 4.66149 0.0454468431315 609
1.51768 4.83281 4.85049 0.0325924223973 610
1.51218 4.98271 4.99489 0.0250665202214 611
1.50825 5.13266 5.14091 0.0190715975519 612
1.50476 5.33263 5.33739 0.0130290884002 613
1.50263 5.53262 5.53525 0.00872664538837 614
1.50137 5.73261 5.73398 0.00571416964247 615
5.93566 2.28637 6.42203 0.000435557084694 616
5.78566 2.2859 6.27156 0.00077506633946 617
5.63566 2.28543 6.12109 0.00124693322699 618
5.48566 2.28504 5.9707 0.00189844110043 619
5.33566 2.28483 5.82049 0.00279210113196 620
5.18566 2.28496 5.67062 0.00400903690935 621
5.03566 2.28567 5.52133 0.00565216243996 622
4.83568 2.28811 5.32379 0.00872887640758 623
4.68572 2.29167 5.17739 0.0119021461411 624
4.53583 2.29743 5.03326 0.0160138140323 625
4.33623 2.30993 4.84616 0.0232813538967 626
4.13727 2.33007 4.66734 0.0329750097253 627
3.98885 2.35173 4.54058 0.0420344791709 628
3.84157 2.38012 4.42169 0.0527022975095 629
3.64784 2.42964 4.27748 0.0693786142688 630
3.45811 2.49278 4.15089 0.0885894211583 631
3.27288 2.56813 4.04101 0.109799793201 632
3.13671 2.63103 3.96774 0.126670364863 633
2.9581 2.721 3.8791 0.150014066066 634
2.82586 2.7918 3.81766 0.169089327119 635
2.23317 3.16302 3.59619 0.231666983214 636
2.11737 3.25833 3.5757 0.233598955722 637
1.97577 3.39941 3.57518 0.226179183191 638
1.85364 3.5576 3.61124 0.208079742088 639
1.777 3.68648 3.66348 0.189251729106 640
1.71351 3.82233 3.73584 0.167834012706 641
1.64771 4.0111 3.85881 0.13802034575 642
1.60003 4.20528 4.00531 0.10971964801 643
1.56639 4.4024 4.16879 0.0846847560155 644
1.54317 4.60103 4.3442 0.0637399047129 645
1.53082 4.75052 4.48134 0.0508072220174 646
1.51925 4.95018 4.66943 0.0354861489625 647
1.51172 5.15003 4.86175 0.0247941916499 648
1.50691 5.34997 5.05688 0.016941099274 649
1.50454 5.49996 5.2045 0.0125445297989 650
1.50249 5.69994 5.40243 0.00822822870795 651
1.50153 5.84994 5.55147 0.00588910316795 652
6.08153 2.2868 6.26833 0.000394101014212 653
5.93153 2.28646 6.11799 0.000743960219795 654
5.78153 2.28617 5.9677 0.00123382649374 655
5.63153 2.286 5.81753 0.00191372250907 656
5.48153 2.28609 5.66762 0.00284890661317 657
5.33153 2.28661 5.51814 0.00412287161101 658
5.13154 2.28844 5.31998 0.00653102017694 659
4.98156 2.29117 5.17273 0.00903568718716 660
4.78167 2.29767 4.97934 0.0135899391866 661
4.58201 2.30907 4.79108 0.0198818080542 662
4.43259 2.32221 4.6548 0.025960882224 663
4.28372 2.34052 4.52424 0.0333446823214 664
4.13578 2.36522 4.401 0.0421061997065 665
3.98928 2.39739 4.28667 0.0522562866523 666
3.79727 2.45316 4.15043 0.0679266796963 667
3.65645 2.50478 4.06123 0.0809649553798 668
3.51865 2.56401 3.98266 0.0949439851701 669
3.33929 2.65244 3.89173 0.114975027185 670
3.20728 2.72367 3.83095 0.130843577537 671
1.93925 3.60109 3.44034 0.233290646276 672
1.8498 3.72143 3.47123 0.218173697088 673
1.75084 3.89507 3.54591 0.191607780538 674
1.67495 4.07999 3.65494 0.161262501392 675
1.61922 4.27199 3.79121 0.130867267111 676
1.5882 4.41873 3.90693 0.10953998642 677
1.56451 4.56684 4.03135 0.0902104167535 678
1.54173 4.76552 4.20725 0.0680969139152 679
1.5264 4.96493 4.39133 0.0488599345748 680
1.51628 5.16467 4.58095 0.0346837628849 681
1.50976 5.36456 4.77432 0.024001348169 682
1.50565 5.56451 4.97016 0.0161930350567 683
1.50364 5.7145 5.11814 0.0118468670487 684
1.50193 5.91449 5.31642 0.00761086977784 685
1.50114 6.06449 5.46563 0.00533699849557 686
6.22745 2.28699 6.11444 0.000450455996403 687
6.07745 2.28672 5.96417 0.000850470285905 688
5.92745 2.28652 5.81397 0.00141178556296 689
5.77745 2.28648 5.66393 0.00219046673909 690
5.62745 2.28674 5.51419 0.00325822367466 691
5.42746 2.2879 5.31536 0.00528872453491 692
5.27747 2.28977 5.16724 0.00741043964142 693
5.1275 2.29297 5.02047 0.0101881357412 694
4.92765 2.30037 4.82802 0.0151529612801 695
4.77791 2.30931 4.68722 0.0200017867577 696
4.57878 2.3277 4.50648 0.0281867243076 697
4.43016 2.34794 4.3781 0.035710074024 698
4.28267 2.37519 4.25786 0.0444326538459 699
4.13694 2.41066 4.1476 0.0542968128017 700
3.94667 2.47209 4.01876 0.0689315690311 701
3.76238 2.54963 3.91201 0.085076686961 702
3.62835 2.61695 3.8453 0.0980122960904 703
3.49745 2.6902 3.78765 0.111693525231 704
1.74873 4.05605 3.40478 0.206415479187 705
1.67268 4.2409 3.51358 0.175412880294 706
1.62926 4.38445 3.61371 0.151580196646 707
1.59557 4.5306 3.72617 0.128610873542 708
1.56273 4.72785 3.89058 0.100743635604 709
1.54029 4.92657 4.06686 0.0752026127672 710
1.52846 5.0761 4.20456 0.059801956004 711
1.51981 5.22585 4.34566 0.0468175841556 712
1.51357 5.37572 4.48929 0.0360946644666 713
1.50795 5.57564 4.68359 0.0249209943058 714
1.50446 5.77561 4.88007 0.016740273664 715
1.50237 5.9756 5.07797 0.010918592597 716
1.50115 6.17559 5.27674 0.00688208818435 717
6.37363 2.28697 5.9606 0.00063915289833 718
6.22363 2.2867 5.81033 0.00113781591125 719
6.07363 2.28652 5.66015 0.0018342337373 720
5.92363 2.28651 5.51014 0.00279401731993 721
5.77363 2.28683 5.36046 0.00409877527362 722
5.62363 2.28766 5.21129 0.00584729083564 723
5.42365 2.29014 5.01379 0.00906756652596 724
5.27369 2.29359 4.86728 0.0123139850566 725
5.12379 2.2991 4.72289 0.0164149873918 726
4.92416 2.3111 4.53526 0.0233892157298 727
4.77481 2.32499 4.3998 0.0298437762991 728
4.57675 2.35256 4.22931 0.040152142624 729
4.42966 2.3819 4.11156 0.0490801368743 730
4.23693 2.4351 3.97203 0.0622917276625 731
4.05 2.506 3.856 0.0765891857116 732
3.9146 2.5705 3.7851 0.0877757639772 733
3.78345 2.64327 3.72672 0.0992790296547 734
1.65593 4.44606 3.40199 0.187040784402 735
1.61563 4.59052 3.50615 0.162040095214 736
1.58465 4.73727 3.62192 0.13751173017 737
1.55477 4.935 3.78977 0.107753627733 738
1.5346 5.13396 3.96856 0.081829019939 739
1.5241 5.28359 4.10769 0.0653210469054 740
1.5165 5.4334 4.2499 0.0513288359032 741
1.50965 5.63328 4.44293 0.0363338101836 742
1.50539 5.83323 4.63862 0.0250225207013 743
1.50335 5.98322 4.78657 0.0185702319128 744
1.50163 6.18321 4.98484 0.0121539636642 745
1.50086 6.33321 5.13407 0.00864957203222 746
6.52009 2.28672 5.80681 0.00101154184897 747
6.37009 2.2864 5.65649 0.00167030883774 748
6.22009 2.28617 5.50626 0.0025811907098 749
6.07009 2.2861 5.35619 0.00382296762985 750
5.92009 2.28635 5.20644 0.0054904146262 751
5.77009 2.28714 5.05723 0.00779026167211 752
5.57011 2.28959 4.8597 0.011723657706 753
5.42015 2.29309 4.71324 0.0156241427895 754
5.27025 2.29873 4.56898 0.0204664522594 755
5.07065 2.31116 4.38181 0.0285151461129 756
4.92136 2.32568 4.24704 0.0358031182409 757
4.72351 2.35468 4.07819 0.0470668078093 758
4.57678 2.38574 3.96252 0.0564806283876 759
4.38503 2.44234 3.82737 0.0698581408697 760
4.2455 2.49731 3.74281 0.0801358683191 761
4.0668 2.58694 3.65374 0.0936495349108 762
3.93853 2.66467 3.6032 0.103743383758 763
6.68827 2.28631 5.67458 0.00153439497603 774
6.53827 2.28588 5.52415 0.00239331158902 775
6.38827 2.28549 5.37376 0.00356829982564 776
6.23827 2.28525 5.22352 0.00515183329772 777
6.08827 2.28528 5.07355 0.00725306896077 778
5.93827 2.2858 4.92407 0.00999412987466 779
5.73828 2.28781 4.72609 0.0148672535713 780
5.58831 2.29092 4.57923 0.0195955150032 781
5.38846 2.29849 4.38695 0.0275151382155 782
5.18894 2.3121 4.20104 0.0372719174109 783
5.0398 2.32811 4.06791 0.045854280063 784
4.89155 2.35086 3.94241 0.0553269686649 785
4.74486 2.3821 3.82696 0.0654362009914 786
4.55344 2.43975 3.69319 0.0792733761916 787
4.41454 2.49629 3.61083 0.0893804772703 788
4.23753 2.58919 3.52672 0.101860038831 789
6.82604 2.28556 5.5116 0.00254557789515 790
6.67604 2.28496 5.361 0.00376120396779 791
6.52604 2.28438 5.21042 0.00539890949121 792
6.37604 2.28391 5.05995 0.00757202350904 793
6.22604 2.2837 4.90974 0.0104083227945 794
6.07604 2.28396 4.76 0.0140442549312 795
5.92604 2.28504 4.61108 0.0186132554919 796
5.72608 2.28859 4.41467 0.0263533162313 797
5.57617 2.29375 4.26992 0.0334892843895 798
5.37655 2.30588 4.08243 0.0447500394759 799
5.22728 2.32065 3.94793 0.054415117678 800
5.02966 2.35113 3.78079 0.0684881106822 801
4.88345 2.38453 3.66798 0.0796069626514 802
4.69334 2.44633 3.53967 0.0941599715744 803
4.51166 2.52969 3.44135 0.107156040716 804
6.98861 2.28465 5.37326 0.00386888506194 805
6.83861 2.28381 5.22242 0.00551802930586 806
6.63862 2.28267 5.02129 0.00858366933441 807
6.48862 2.28191 4.87053 0.0117093546737 808
6.33862 2.2814 4.72002 0.0157055207538 809
6.18862 2.28141 4.57003 0.0207137795485 810
6.03862 2.28233 4.42095 0.0268540589537 811
5.83866 2.28594 4.2246 0.0369276739911 812
5.68876 2.29153 4.08029 0.045898270613 813
5.48924 2.30505 3.89429 0.059565390573 814
5.34018 2.32178 3.76196 0.0708707703088 815
5.14328 2.35653 3.59981 0.0865331236773 816
4.99821 2.39455 3.49276 0.0985043259309 817
4.81086 2.46422 3.37508 0.11363048527 818
7.10376 2.28312 5.18688 0.00648329369462 819
6.95376 2.28196 5.03572 0.00895242909603 820
6.75377 2.28032 4.83409 0.0134444401383 821
6.60377 2.27916 4.68293 0.0179220611935 822
6.45377 2.27827 4.53204 0.0235094735345 823
6.30377 2.27795 4.38172 0.0303297531451 824
6.10378 2.27923 4.18301 0.0414450717824 825
5.90384 2.28408 3.98792 0.0547950697487 826
5.70416 2.29514 3.7993 0.0698816040442 827
5.5053 2.31621 3.62151 0.0859883094572 828
5.03668 2.33562 7.3723 0.00252787398302 836
4.83675 2.3305 7.16725 0.00399754060653 837
4.68682 2.32571 7.01253 0.00554378578088 838
4.48698 2.3179 6.80488 0.00841244638039 839
4.33714 2.31092 6.64806 0.0113533482181 840
4.13743 2.30018 6.43761 0.0166556153456 841
3.93779 2.28812 6.22591 0.0239846988454 842
3.73819 2.2755 6.01369 0.0338991574521 843
3.53855 2.26359 5.80214 0.0470143846749 844
3.38873 2.25624 5.64497 0.0593412896459 845
3.23881 2.2514 5.49021 0.074115643564 846
3.03882 2.25112 5.28994 0.0980315393373 847
2.83912 2.26143 5.10055 0.122619432489 848
2.69017 2.27897 4.96914 0.143958758892 849
2.49456 2.32012 4.81468 0.173355500401 850
2.35248 2.36799 4.72047 0.193767672532 851
2.17508 2.4597 4.63478 0.213568520494 852
2.02045 2.58596 4.60641 0.219169721022 853
1.89667 2.74261 4.63928 0.209290816448 854
1.82498 2.87426 4.69924 0.189373462701 855
1.76937 3.01351 4.78288 0.169147630552 856
1.7154 3.206 4.9214 0.141484670544 857
1.67872 3.40256 5.08128 0.115524765494 858
1.6543 3.60104 5.25534 0.0925444100305 859
1.64174 3.75051 5.39225 0.0775057594287 860
1.63278 3.90024 5.53302 0.0643396142788 861
1.6265 4.05011 5.67661 0.0529545132031 862
1.62218 4.20005 5.82223 0.0429973048769 863
1.61858 4.40001 6.01859 0.0322534788269 864
1.6166 4.6 6.2166 0.0237928872797 865
1.61579 4.75 6.36579 0.0187259742202 866
1.61535 4.9 6.51535 0.0145911424621 867
1.61514 5.05 6.66514 0.011250781271 868
5.19847 2.33917 7.23764 0.00179224007779 869
4.99851 2.33533 7.03384 0.00290216302432 870
4.84855 2.33174 6.88029 0.00408207343021 871
4.69861 2.32749 6.7261 0.0056625954745 872
4.49873 2.32073 6.51946 0.00859897923166 873
4.34884 2.31489 6.36373 0.0116138685749 874
4.14903 2.3063 6.15533 0.017056000897 875
3.99918 2.29958 5.99876 0.0224728640114 876
3.84932 2.29304 5.84236 0.0292830316571 877
3.69943 2.28728 5.68671 0.0378807937716 878
3.54949 2.28304 5.53253 0.0479874035017 879
3.34951 2.2814 5.33091 0.064650857163 880
3.19955 2.28471 5.18426 0.0796433911319 881
3.04981 2.29341 5.04322 0.0967265785255 882
2.90064 2.30907 4.90971 0.115606367991 883
2.70374 2.34379 4.74753 0.142009022783 884
2.51149 2.39852 4.61001 0.167286873413 885
2.37283 2.45557 4.5284 0.185288173289 886
2.20028 2.55625 4.45653 0.201504365343 887
2.04877 2.68636 4.43513 0.204770026949 888
1.95286 2.80155 4.45441 0.198555231943 889
1.87338 2.92866 4.50204 0.185710871951 890
1.79152 3.11096 4.60248 0.162389301668 891
1.74562 3.25373 4.69935 0.143032407241 892
1.70073 3.44857 4.8493 0.117643643934 893
1.66996 3.64616 5.01612 0.0942481429157 894
1.64932 3.84508 5.1944 0.07403330821 895
1.63582 4.04461 5.38043 0.0571069489076 896
1.629 4.19446 5.52346 0.0464809921889 897
1.623 4.39436 5.71736 0.0348175822453 898
1.62013 4.54434 5.86447 0.0277348841464 899
1.61775 4.74432 6.06207 0.0201877080241 900
1.6167 4.89432 6.21102 0.0157335380549 901
1.61607 5.04432 6.36039 0.0121415348254 902
1.61572 5.19432 6.51004 0.00927171174967 903
5.34857 2.34174 7.09031 0.00131059875738 904
5.14859 2.33885 6.88744 0.00217952227321 905
4.94863 2.3352 6.68383 0.00348695367884 906
4.79866 2.33192 6.53058 0.00487025134813 907
4.59873 2.32685 6.32558 0.00745425906582 908
4.39881 2.32117 6.11998 0.0111817034385 909
4.24887 2.31676 5.96563 0.0149659401162 910
4.04895 2.3113 5.76025 0.0217030090993 911
3.89898 2.30815 5.60713 0.0283062474134 912
3.69899 2.30646 5.40545 0.0396447061429 913
3.549 2.3082 5.2572 0.0502123139238 914
3.34919 2.31651 5.0657 0.0675045183022 915
3.15 2.33424 4.88424 0.0885080522293 916
3.00153 2.35551 4.75704 0.106407520383 917
2.85449 2.38506 4.63955 0.125459786549 918
2.66212 2.4395 4.50162 0.150237789889 919
2.52211 2.49322 4.41533 0.167221844229 920
2.3875 2.5593 4.3468 0.183868024753 921
2.22003 2.66831 4.28834 0.19740357344 922
2.10658 2.76632 4.2729 0.200163288354 923
1.97591 2.91744 4.29335 0.192769649825 924
1.87141 3.08775 4.35916 0.174809130959 925
1.79226 3.27127 4.46353 0.150896945925 926
1.73469 3.46273 4.59742 0.125403040652 927
1.69406 3.65851 4.75257 0.101204763004 928
1.66607 3.85652 4.92259 0.0798299507015 929
1.64723 4.05562 5.10285 0.0614010330288 930
1.63745 4.2053 5.24275 0.0499110826331 931
1.62856 4.40509 5.43365 0.0372913048544 932
1.62414 4.55503 5.57917 0.0296409887644 933
1.62108 4.705 5.72608 0.023344462552 934
1.6185 4.90498 5.92348 0.0167365753384 935
1.61732 5.05498 6.0723 0.0128959587372 936
1.61639 5.25497 6.27136 0.00896639349902 937
5.49789 2.3437 6.94159 0.000955395823032 938
5.2979 2.34157 6.73947 0.00164827553613 939
5.09792 2.33893 6.53685 0.00269657781977 940
4.89795 2.3358 6.33375 0.00426348578199 941
4.74797 2.33319 6.18116 0.0059109702658 942
4.59799 2.33049 6.02848 0.00809530668247 943
4.39802 2.32712 5.82514 0.012100419571 944
4.19804 2.32474 5.62278 0.0177482116811 945
4.04804 2.32431 5.47235 0.0233645197171 946
3.84806 2.32682 5.27488 0.0332517670539 947
3.69815 2.33213 5.13028 0.0425285754003 948
3.49863 2.34565 4.94428 0.0579367859477 949
3.34953 2.36201 4.81154 0.0718774086482 950
3.15215 2.39405 4.6462 0.0934434543641 951
3.00581 2.42693 4.53274 0.111388290057 952
2.81415 2.48391 4.39806 0.136211560683 953
2.62809 2.55708 4.28517 0.158726198859 954
2.49356 2.62336 4.21692 0.174787551584 955
2.36473 2.70012 4.16485 0.188072527083 956
2.20474 2.81992 4.12466 0.197501382603 957
2.06267 2.96045 4.12312 0.195544726204 958
1.97066 3.07883 4.14949 0.186509279699 959
1.86941 3.25112 4.22053 0.16666874501 960
1.79201 3.4354 4.32741 0.142042175167 961
1.74775 3.57869 4.42644 0.122850949089 962
1.71334 3.72467 4.53801 0.104355007353 963
1.6797 3.92179 4.70149 0.0820694378566 964
1.66161 4.07069 4.8323 0.0675600735859 965
1.64454 4.26995 5.01449 0.0513482448485 966
1.63569 4.41969 5.15538 0.0406800128114 967
1.62763 4.61952 5.34715 0.0297807809124 968
1.62362 4.76947 5.49309 0.0233127835443 969
1.62013 4.96944 5.68957 0.0165790458703 970
1.61807 5.16942 5.88749 0.0115926100686 971
1.61712 5.31942 6.03654 0.00875866117803 972
1.61653 5.46942 6.18595 0.00654142649312 973
5.64651 2.34518 6.79169 0.000691694836275 974
5.44652 2.34364 6.59016 0.00125913911024 975
5.29652 2.34228 6.4388 0.00187177941302 976
5.09653 2.34025 6.23678 0.00304487864828 977
4.89655 2.33813 6.03468 0.00479348625758 978
4.74655 2.33668 5.88323 0.00662892961522 979
4.54656 2.3354 5.68196 0.0100302189044 980
4.39656 2.3354 5.53196 0.0135154399792 981
4.24656 2.33679 5.38335 0.0180233739327 982
4.04664 2.34198 5.18862 0.0260128244399 983
3.84694 2.35282 4.99976 0.0369670085747 984
3.69753 2.36605 4.86358 0.0470376767159 985
3.54871 2.38477 4.73348 0.0590132782842 986
3.40084 2.40989 4.61073 0.0729529569199 987
3.25436 2.44213 4.49649 0.0886185200036 988
3.06204 2.49688 4.35892 0.111608675367 989
2.87413 2.56524 4.23937 0.135690052644 990
2.7367 2.62531 4.16201 0.153047070425 991
2.55911 2.71718 4.07629 0.172958444524 992
2.43112 2.79537 4.02649 0.186411756999 993
2.26971 2.91333 3.98304 0.197289561397 994
2.12266 3.0487 3.97136 0.19784418106 995
2.02468 3.1622 3.98688 0.190809562617 996
1.93917 3.28537 4.02454 0.17817269027 997
1.84581 3.46209 4.1079 0.15539798022 998
1.77499 3.64902 4.22401 0.129674547595 999
1.72338 3.84218 4.36556 0.104321054957 1000
1.6869 4.03879 4.52569 0.0815371298358 1001
1.66715 4.18748 4.65463 0.0667146634475 1002
1.6524 4.33675 4.78915 0.0539847951932 1003
1.63859 4.53626 4.97485 0.0393170749448 1004
1.6296 4.73606 5.16566 0.0284130285687 1005
1.6239 4.93597 5.35987 0.020179316596 1006
1.6211 5.08595 5.50705 0.0154379448307 1007
1.61919 5.23594 5.65513 0.0116952188741 1008
1.61759 5.43593 5.85352 0.00794410299442 1009
1.61686 5.58593 6.00279 0.00585971986935 1010
5.79458 2.34627 6.64085 0.000499143691931 1011
5.64458 2.34546 6.49004 0.000842559085955 1012
5.49458 2.34455 6.33913 0.00131635769466 1013
5.29459 2.34328 6.13787 0.00223198884848 1014
5.14459 2.34238 5.98697 0.00321383206757 1015
4.99459 2.34167 5.83626 0.00454194316231 1016
4.84459 2.34139 5.68598 0.0063252899159 1017
4.69459 2.34183 5.53642 0.00869947282317 1018
4.49461 2.34433 5.33894 0.0130708528628 1019
4.29471 2.35034 5.14505 0.0192444287375 1020
4.14492 2.35828 5.0032 0.0253610220838 1021
3.9954 2.37021 4.86561 0.0329819360574 1022
3.79685 2.39412 4.69097 0.0460991060638 1023
3.6 2.42928 4.52928 0.0618667908171 1024
3.4541 2.46405 4.41815 0.0757157170524 1025
3.31019 2.50631 4.3165 0.0910897836476 1026
3.16863 2.55588 4.22451 0.107575618506 1027
2.98388 2.63239 4.11627 0.130546743838 1028
2.84839 2.69673 4.04512 0.147768311992 1029
2.71564 2.76656 3.9822 0.164030824325 1030
2.54344 2.86822 3.91166 0.182619788016 1031
2.41877 2.95161 3.87038 0.193995934711 1032
2.26086 3.07424 3.8351 0.202297464907 1033
2.11639 3.21239 3.82878 0.200114065647 1034
2.01985 3.32713 3.84698 0.191347057906 1035
1.9102 3.49421 3.90441 0.171910174565 1036
1.84318 3.62835 3.97153 0.153536260019 1037
1.77314 3.81558 4.08872 0.127163790287 1038
1.73331 3.96017 4.19348 0.107659868108 1039
1.70246 4.10695 4.30941 0.0895965949019 1040
1.67245 4.30466 4.47711 0.0684995851167 1041
1.65201 4.5036 4.65561 0.0512300813429 1042
1.63839 4.70313 4.84152 0.0365725722207 1043
1.62953 4.90293 5.03246 0.0259964451688 1044
1.6239 5.10285 5.22675 0.0181274271783 1045
1.62042 5.30282 5.42324 0.0124031749736 1046
1.61834 5.5028 5.62114 0.00831737779473 1047
1.61737 5.6528 5.77017 0.00607065744749 1048
5.9423 2.34704 6.48934 0.000369932505173 1049
5.7923 2.34645 6.33875 0.000683370865063 1050
5.6423 2.34584 6.18814 0.00111942354961 1051
5.4923 2.34525 6.03755 0.00172232777263 1052
5.3423 2.34479 5.88709 0.00255033583352 1053
5.1923 2.3446 5.7369 0.00367985009871 1054
5.0423 2.3449 5.5872 0.00520845785733 1055
4.84231 2.34664 5.38895 0.00808108023622 1056
4.64236 2.35091 5.19327 0.0122389006429 1057
4.49247 2.35672 5.04919 0.0164530543041 1058
4.34274 2.36569 4.90843 0.0218174619375 1059
4.14363 2.3843 4.72793 0.0310714555729 1060
3.99503 2.40469 4.59972 0.0397745706274 1061
3.79866 2.44242 4.44108 0.054245902473 1062
3.65335 2.4796 4.33295 0.0665399275531 1063
3.51029 2.52465 4.23494 0.0801616832178 1064
3.32359 2.59625 4.11984 0.1002016663 1065
3.18663 2.6574 4.04403 0.11616830907 1066
3.05206 2.72365 3.97571 0.132608321023 1067
2.91959 2.79401 3.9136 0.149127774694 1068
2.33205 3.17308 3.70513 0.207732506989 1069
2.18165 3.30479 3.68644 0.208900312308 1070
2.04671 3.45225 3.69896 0.199435181707 1071
1.93208 3.61597 3.74805 0.180632617893 1072
1.84039 3.79356 3.83395 0.155724113909 1073
1.78634 3.93344 3.91978 0.135377587827 1074
1.73144 4.12569 4.05713 0.108566276514 1075
1.69248 4.32182 4.2143 0.0843474799343 1076
1.66555 4.51997 4.38552 0.063775025965 1077
1.64736 4.71913 4.56649 0.0471732227689 1078
1.63788 4.86883 4.70671 0.0358756912138 1079
1.6292 5.06864 4.89784 0.0251783480822 1080
1.62484 5.21858 5.04342 0.0190273354865 1081
1.621 5.41854 5.23954 0.0128463714753 1082
1.61915 5.56853 5.38768 0.0094231873453 1083
1.6176 5.76852 5.58612 0.00609038532447 1084
1.6169 5.91852 5.73542 0.00429700699679 1085
6.08988 2.34753 6.33741 0.000308677112735 1086
5.93988 2.3471 6.18698 0.000623004654293 1087
5.78988 2.34668 6.03656 0.00106417498841 1088
5.63988 2.34635 5.88623 0.00167796997571 1089
5.48988 2.34621 5.73609 0.00252477627557 1090
5.33988 2.34644 5.58632 0.00368240944407 1091
5.13989 2.34776 5.38765 0.00588186821198 1092
4.9899 2.34999 5.23989 0.00818321606988 1093
4.78999 2.35562 5.04561 0.0123980027912 1094
4.64016 2.36279 4.90295 0.0166283540918 1095
4.44075 2.37803 4.71878 0.0240006785114 1096
4.24224 2.40223 4.54447 0.0338897841082 1097
4.09448 2.42798 4.42246 0.0426976518832 1098
3.9 2.47444 4.27444 0.0565880994715 1099
3.70973 2.5359 4.14563 0.0727256733102 1100
3.57044 2.59153 4.06197 0.0859993317375 1101
3.38939 2.67642 3.96581 0.105075249546 1102
3.21279 2.77027 3.88306 0.125257412913 1103
2.10938 3.53943 3.54881 0.214537015331 1104
1.98411 3.69516 3.57927 0.199096935631 1105
1.88087 3.86629 3.64716 0.17587075419 1106
1.80072 4.0494 3.75012 0.148493460452 1107
1.74148 4.24034 3.88182 0.120427561437 1108
1.70845 4.38664 3.99509 0.100661618702 1109
1.68327 4.5345 4.11777 0.0827126578509 1110
1.66431 4.68329 4.2476 0.0669455778815 1111
1.64643 4.88248 4.42891 0.0494961951494 1112
1.63714 5.03219 4.56933 0.0374774945943 1113
1.63045 5.18204 4.71249 0.0286814275724 1114
1.62444 5.38194 4.90638 0.01963882796 1115
1.62073 5.58191 5.10264 0.0131059917344 1116
1.61895 5.7319 5.25085 0.00950359121815 1117
1.61747 5.93189 5.44936 0.00601950242104 1118
1.6168 6.08189 5.59869 0.00416207210864 1119
6.23752 2.34778 6.1853 0.000331336798417 1120
6.08752 2.34743 6.03495 0.000681784205484 1121
5.93752 2.34712 5.88464 0.00117565479168 1122
5.78752 2.34694 5.73446 0.00186378174819 1123
5.63752 2.347 5.58452 0.00281200404187 1124
5.48752 2.34749 5.43501 0.00410340233669 1125
5.28753 2.34929 5.23682 0.00653759439342 1126
5.08757 2.35331 5.04088 0.0100548287707 1127
4.88772 2.36098 4.8487 0.0149841822086 1128
4.68818 2.37431 4.66249 0.0216538505241 1129
4.53896 2.38959 4.52855 0.0279625736632 1130
4.34124 2.41948 4.36072 0.0382459633249 1131
4.14609 2.46304 4.20913 0.0505691284349 1132
4.00242 2.50609 4.10851 0.0610746122181 1133
3.81578 2.5778 3.99358 0.0764808047995 1134
3.63546 2.6642 3.89966 0.0931911765195 1135
3.50401 2.73645 3.84046 0.106474397138 1136
1.90341 3.98268 3.48609 0.194450171602 1137
1.83655 4.1169 3.55345 0.174227710026 1138
1.76704 4.30432 3.67136 0.145132241013 1139
1.71685 4.49786 3.81471 0.116633756485 1140
1.68178 4.69472 3.9765 0.0908304493489 1141
1.6579 4.89327 4.15117 0.0688553801007 1142
1.64537 5.04275 4.28812 0.0535027341196 1143
1.63384 5.24241 4.47625 0.0382172680174 1144
1.62648 5.44227 4.66875 0.0265563577058 1145
1.62284 5.59223 4.81507 0.0198491488726 1146
1.6197 5.7922 5.0119 0.0131296253731 1147
1.61785 5.99219 5.21004 0.00841164733654 1148
1.61701 6.14219 5.3592 0.00587309129645 1149
6.38534 2.3478 6.03314 0.00046578144462 1150
6.23534 2.34747 5.88281 0.000894613529405 1151
6.08534 2.3472 5.73254 0.00149718731016 1152
5.93534 2.34706 5.5824 0.00233275576147 1153
5.78534 2.3472 5.43254 0.00347598387807 1154
5.63534 2.3478 5.28314 0.00501873049713 1155
5.43535 2.34985 5.0852 0.00788592143858 1156
5.28538 2.35286 4.93824 0.0108042836496 1157
5.13546 2.35782 4.79328 0.0145241777389 1158
4.98566 2.36553 4.65119 0.0191670987118 1159
4.78635 2.38189 4.46824 0.0269321588774 1160
4.6375 2.40039 4.33789 0.034003824202 1161
4.44076 2.4361 4.17686 0.0450767734851 1162
4.29539 2.47299 4.06838 0.0544538892679 1163
4.15286 2.51966 3.97252 0.0645661063011 1164
3.96865 2.59736 3.86601 0.0788674001995 1165
3.79186 2.69077 3.78263 0.0938410964224 1166
1.8578 4.22909 3.38689 0.198445540608 1167
1.79879 4.36695 3.46574 0.176830886887 1168
1.73878 4.55764 3.59642 0.146861135152 1169
1.6964 4.75305 3.74945 0.11816124928 1170
1.67359 4.9013 3.87489 0.0960321861783 1171
1.65208 5.10012 4.0522 0.0724480177655 1172
1.63795 5.29961 4.23756 0.0530614737095 1173
1.63079 5.44944 4.38023 0.0412232082575 1174
1.62442 5.64934 4.57376 0.0287194659142 1175
1.62132 5.79931 4.72063 0.0214928653399 1176
1.6187 5.99929 4.91799 0.0142243634195 1177
1.6172 6.19928 5.11648 0.0091040655235 1178
1.61655 6.34928 5.26583 0.00634417178639 1179
6.53335 2.3476 5.88095 0.00075418054827 1180
6.38335 2.34723 5.73058 0.00131447914047 1181
6.23335 2.34692 5.58027 0.00209487690553 1182
6.08335 2.34674 5.43009 0.00316643837008 1183
5.93335 2.34684 5.28019 0.00461622995241 1184
5.78335 2.34742 5.13077 0.00654727824715 1185
5.58336 2.34948 4.93284 0.0100735773559 1186
5.43339 2.35257 4.78596 0.0135933857718 1187
5.23354 2.36001 4.59355 0.019675753804 1188
5.08382 2.36925 4.45307 0.0253872530011 1189
4.88479 2.38871 4.2735 0.0346309621347 1190
4.7364 2.41056 4.14696 0.0426262422784 1191
4.54089 2.45241 3.9933 0.0546662179796 1192
4.39715 2.4952 3.89235 0.0643640221797 1193
4.25706 2.54873 3.80579 0.0743310613946 1194
4.0774 2.63642 3.71382 0.087656003187 1195
1.73881 4.7123 3.45111 0.167630318111 1196
1.70496 4.85841 3.56337 0.143748008759 1197
1.67252 5.05573 3.72825 0.113737709965 1198
1.6509 5.25454 3.90544 0.0872750208156 1199
1.63684 5.45404 4.09088 0.0651078647105 1200
1.62794 5.65383 4.28177 0.047329482931 1201
1.62358 5.80377 4.42735 0.0357852215192 1202
1.61986 6.00374 4.6236 0.024595880223 1203
1.61772 6.20372 4.82144 0.0164163694698 1204
1.61678 6.35372 4.9705 0.0118712470272 1205
1.6162 6.50372 5.11992 0.0084104862266 1206
6.68378 2.34718 5.73096 0.00124791825191 1207
6.53378 2.34671 5.58049 0.00200483991839 1208
6.38378 2.34628 5.43006 0.00304637169038 1209
6.23378 2.34597 5.27975 0.00445852000222 1210
6.08378 2.34592 5.1297 0.0063435133212 1211
5.93378 2.34634 4.98012 0.00881794912289 1212
5.73379 2.34819 4.78198 0.0132513536029 1213
5.58382 2.35116 4.63498 0.0175872453225 1214
5.38396 2.35855 4.44251 0.024910041066 1215
5.18442 2.37201 4.25643 0.0340895449568 1216
4.98574 2.39469 4.08043 0.0449803802416 1217
4.83792 2.42009 3.95801 0.0541879407045 1218
4.64393 2.46847 3.8124 0.0672582438591 1219
4.4559 2.53633 3.69223 0.0804363028673 1220
4.3204 2.6006 3.621 0.0898789484429 1221
4.1483 2.70233 3.55063 0.101533385593 1222
6.80122 2.34638 5.5476 0.00223846453766 1226
6.60123 2.34554 5.34677 0.00380947342355 1227
6.45123 2.34496 5.19619 0.00547394912779 1228
6.30123 2.34453 5.04576 0.00767960006317 1229
6.15123 2.34444 4.89567 0.0105529533622 1230
6.00123 2.34497 4.7462 0.0142269696236 1231
5.80124 2.34733 4.54857 0.0205913948591 1232
5.60133 2.35295 4.35428 0.028844315855 1233
5.40164 2.36402 4.16566 0.0390515991564 1234
5.20263 2.38365 3.98628 0.0510282137627 1235
5.05438 2.40639 3.86077 0.0610323054628 1236
4.9078 2.43812 3.74592 0.0715212540145 1237
4.76398 2.48061 3.64459 0.0820415211563 1238
4.62425 2.53505 3.5593 0.0920592769676 1239
4.44641 2.62631 3.47272 0.103831189731 1240
6.98475 2.34559 5.43034 0.00323978224481 1241
6.83475 2.34474 5.27949 0.00468830089842 1242
6.68475 2.34385 5.1286 0.00662537649081 1243
6.53475 2.34301 4.97776 0.00917601735649 1244
6.33476 2.34223 4.77699 0.0137699688479 1245
6.18476 2.3422 4.62696 0.0182937293804 1246
6.03476 2.34309 4.47785 0.0238815490377 1247
5.83479 2.3467 4.28149 0.0331359180068 1248
5.63497 2.35498 4.08995 0.0444860167024 1249
5.43563 2.37093 3.90656 0.0577319503415 1250
5.2869 2.39033 3.77723 0.0685902714515 1251
5.13956 2.41833 3.65789 0.0798239828758 1252
4.99465 2.45695 3.5516 0.091210479925 1253
4.80765 2.52753 3.43518 0.105333517458 1254
4.67387 2.59528 3.36915 0.11430415632 1255
7.12712 2.34429 5.27141 0.00514602362533 1256
6.92713 2.34274 5.06987 0.00802511924815 1257
6.77713 2.3415 4.91863 0.0109813089719 1258
6.57714 2.33995 4.71709 0.0162723307137 1259
6.42714 2.33912 4.56626 0.0214479816999 1260
6.27714 2.33894 4.41608 0.027768747108 1261
6.12714 2.3399 4.26704 0.0353521493921 1262
5.9272 2.34428 4.07148 0.0473903447829 1263
5.77736 2.35127 3.92863 0.0577119887117 1264
5.57812 2.36841 3.74653 0.072802228309 1265
5.38049 2.39875 3.57924 0.0891609643158 1266
5.23455 2.43328 3.46783 0.100406859822 1267
5.83291 2.35456 3.68747 0.0827508089233 1276
5.02194 2.39579 7.41773 0.00259431139184 1277
4.82203 2.39005 7.21208 0.0040990613267 1278
4.67212 2.38469 7.05681 0.00568048224169 1279
4.47231 2.37598 6.84829 0.00861026308677 1280
4.32251 2.36822 6.69073 0.0116086784392 1281
4.12287 2.35634 6.47921 0.0170037520576 1282
3.97319 2.3465 6.31969 0.0223619721338 1283
3.82354 2.33621 6.15975 0.0290983163502 1284
3.624 2.32275 5.94675 0.0406538984945 1285
3.47426 2.31383 5.78809 0.0516357925825 1286
3.27444 2.3055 5.57994 0.0697064830463 1287
3.07446 2.30423 5.37869 0.0917673758209 1288
2.87475 2.3143 5.18905 0.116314113496 1289
2.67666 2.34124 5.0179 0.143543639089 1290
2.53096 2.37665 4.90761 0.164242853594 1291
2.39039 2.42874 4.81913 0.182936189712 1292
2.21771 2.52893 4.74664 0.199721311538 1293
2.07193 2.66523 4.73716 0.202038586254 1294
1.98465 2.78705 4.7717 0.194140087469 1295
1.89707 2.96659 4.86366 0.174855900753 1296
1.8496 3.10883 4.95843 0.148444108394 1297
1.8143 3.25459 5.06889 0.129350011175 1298
1.78146 3.45183 5.23329 0.105516230328 1299
1.76469 3.60089 5.36558 0.0894335049835 1300
1.74971 3.80031 5.55002 0.0706711240339 1301
1.74056 4.0001 5.74066 0.0549462475681 1302
1.7363 4.15004 5.88634 0.0450268717412 1303
1.7329 4.35001 6.08291 0.0338247011414 1304
1.73119 4.55 6.28119 0.0250742673233 1305
1.73059 4.7 6.43059 0.0197992719372 1306
1.73034 4.85 6.58034 0.0154726468024 1307
1.73032 5.0 6.73032 0.0119609717448 1308
5.1981 2.40001 7.29811 0.00177121742887 1309
5.04813 2.39691 7.14504 0.00255369753646 1310
4.8482 2.39175 6.93995 0.0040427448021 1311
4.64831 2.38525 6.73356 0.00624042770561 1312
4.49842 2.37946 6.57788 0.00852185084926 1313
4.34856 2.37292 6.42148 0.0115096825552 1314
4.19873 2.36576 6.26449 0.0153799658841 1315
4.04892 2.35821 6.10713 0.0203334299513 1316
3.89911 2.35066 5.94977 0.0265886262442 1317
3.69932 2.34161 5.74093 0.0373364452289 1318
3.5494 2.33662 5.58602 0.0474920065652 1319
3.39942 2.33431 5.43373 0.0594931414944 1320
3.19947 2.33767 5.23714 0.0784313164375 1321
3.04977 2.34703 5.0968 0.0954066036834 1322
2.85141 2.37216 4.92357 0.120049635543 1323
2.65647 2.41641 4.77288 0.144859747627 1324
2.51478 2.46547 4.68025 0.161994381128 1325
2.33679 2.55617 4.59296 0.181364985732 1326
2.17872 2.6782 4.55692 0.188586136258 1327
2.0779 2.7891 4.567 0.186028034876 1328
1.97005 2.95722 4.62727 0.172020147879 1329
1.8908 3.14067 4.73147 0.150440478118 1330
1.84706 3.28412 4.83118 0.132470922864 1331
1.80499 3.47958 4.98457 0.108997408175 1332
1.78276 3.62792 5.11068 0.0923458662344 1333
1.76218 3.82684 5.28902 0.0728624093679 1334
1.749 4.0264 5.4754 0.0564268230113 1335
1.74252 4.17626 5.61878 0.0460510419098 1336
1.73698 4.37618 5.81316 0.0346043092839 1337
1.73444 4.52616 5.9606 0.0276207694175 1338
1.73245 4.72615 6.1586 0.0201477247903 1339
1.73148 4.92614 6.35762 0.0144403232873 1340
1.73115 5.07614 6.50729 0.0111120038938 1341
5.34841 2.4028 7.15121 0.00128523637914 1342
5.14844 2.39957 6.94801 0.00214260505612 1343
4.99847 2.39656 6.79503 0.00306039789114 1344
4.84851 2.39301 6.64152 0.00429841636296 1345
4.69856 2.38892 6.48748 0.00595447220425 1346
4.54863 2.38431 6.33294 0.00814918891881 1347
4.34875 2.37758 6.12633 0.012168822481 1348
4.19884 2.37238 5.97122 0.0162306132206 1349
4.04892 2.36746 5.81638 0.0214105884814 1350
3.89897 2.36336 5.66233 0.0279238067038 1351
3.699 2.36046 5.45946 0.0390820581224 1352
3.549 2.36141 5.31041 0.0494857225661 1353
3.34917 2.36908 5.11825 0.0664656704186 1354
3.19968 2.38138 4.98106 0.0815544026116 1355
3.00169 2.40934 4.81103 0.10436373351 1356
2.80679 2.45392 4.66071 0.128580113911 1357
2.61773 2.51882 4.53655 0.150628473849 1358
2.48216 2.58288 4.46504 0.165759611186 1359
2.35442 2.66137 4.41579 0.177590100647 1360
2.20083 2.78911 4.38994 0.183292452208 1361
2.10136 2.90126 4.40262 0.1799804206 1362
2.01706 3.02523 4.44229 0.170280782515 1363
1.92817 3.20421 4.53238 0.150514989659 1364
1.86319 3.39325 4.65644 0.127275865584 1365
1.8273 3.53887 4.76617 0.109740587811 1366
1.79271 3.73582 4.92853 0.0879635495201 1367
1.76945 3.93444 5.10389 0.0690520238774 1368
1.75422 4.13385 5.28807 0.0527310047502 1369
1.74454 4.33361 5.47815 0.0397059507652 1370
1.7398 4.48354 5.62334 0.0317326330886 1371
1.73577 4.6835 5.81927 0.0231890929907 1372
1.73348 4.88348 6.01696 0.0166603014958 1373
1.73249 5.03348 6.16597 0.0128514304968 1374
1.73191 5.18348 6.31539 0.00980892211016 1375
1.73159 5.33348 6.46507 0.00740042841876 1376
5.49797 2.40495 7.00292 0.00092542038397 1377
5.34798 2.40319 6.85117 0.00140688296481 1378
5.19799 2.40109 6.69908 0.00206556211599 1379
5.04801 2.39863 6.54664 0.00296077654334 1380
4.84805 2.39482 6.34287 0.00465660222893 1381
4.69808 2.39163 6.18971 0.00643429314271 1382
4.49813 2.38721 5.98534 0.00972017321494 1383
4.29817 2.38316 5.78133 0.0143992942202 1384
4.09819 2.38047 5.57866 0.0209282141839 1385
3.94819 2.38024 5.42843 0.0273529850759 1386
3.74823 2.38388 5.23211 0.0383931675262 1387
3.54852 2.39426 5.04278 0.0526791032878 1388
3.39917 2.40815 4.90732 0.0656774447814 1389
3.20131 2.43711 4.73842 0.0858626069725 1390
3.05458 2.46818 4.62276 0.102805969291 1391
2.86259 2.52396 4.48655 0.126303969404 1392
2.72255 2.57762 4.40017 0.142747491464 1393
2.5872 2.6422 4.3294 0.156773050344 1394
2.4166 2.74634 4.26294 0.173274466814 1395
2.29842 2.83862 4.23704 0.179601109665 1396
2.15781 2.9806 4.23841 0.17869348534 1397
2.04045 3.14232 4.28277 0.166822083704 1398
1.94804 3.31952 4.36756 0.147143920365 1399
1.8942 3.45948 4.45368 0.129882779245 1400
1.85193 3.60337 4.5553 0.112217928121 1401
1.81036 3.79895 4.70931 0.0898461899393 1402
1.7818 3.99688 4.87868 0.070156165888 1403
1.7627 4.19595 5.05865 0.0537054227232 1404
1.75025 4.39556 5.24581 0.0398909958514 1405
1.74236 4.5954 5.43776 0.029295499777 1406
1.73752 4.79534 5.63286 0.0211491566896 1407
1.73467 4.99532 5.82999 0.015009314232 1408
1.73306 5.19531 6.02837 0.0104623035176 1409
1.73237 5.34531 6.17768 0.00787810989442 1410
1.73197 5.49531 6.32728 0.00585673273123 1411
5.64683 2.40659 6.85342 0.00065727431216 1412
5.44684 2.4048 6.65164 0.00120766955014 1413
5.24685 2.40261 6.44946 0.00204540380223 1414
5.09686 2.40074 6.2976 0.00294209700663 1415
4.89688 2.39806 6.09494 0.00464187915777 1416
4.74689 2.39608 5.94297 0.0064264610749 1417
4.54691 2.39392 5.74083 0.0097341726882 1418
4.39691 2.39314 5.59005 0.0131242037939 1419
4.24691 2.39365 5.44056 0.0175101729897 1420
4.09693 2.39612 5.29305 0.0234055244743 1421
3.89709 2.40397 5.10106 0.0330343617711 1422
3.74747 2.41459 4.96206 0.042258138531 1423
3.54877 2.43714 4.78591 0.0574580907526 1424
3.3518 2.47159 4.62339 0.0759383520093 1425
3.20592 2.50646 4.51238 0.091645156206 1426
3.01504 2.56598 4.38102 0.11412238728 1427
2.87538 2.62066 4.29604 0.131071636797 1428
2.69509 2.7071 4.20219 0.151027835584 1429
2.52332 2.80942 4.13274 0.167678887943 1430
2.36286 2.92863 4.09149 0.17849647847 1431
2.25227 3.0299 4.08217 0.18041632228 1432
2.12148 3.18101 4.10249 0.173442315689 1433
2.03798 3.30555 4.14353 0.161884541848 1434
1.94738 3.4837 4.23108 0.140922524491 1435
1.87918 3.67161 4.35079 0.117271162863 1436
1.82994 3.86539 4.49533 0.0941099458843 1437
1.80295 4.01293 4.61588 0.07820424479 1438
1.77711 4.21123 4.78834 0.0598589408035 1439
1.76351 4.36061 4.92412 0.0483543437372 1440
1.75099 4.56021 5.1112 0.035930023364 1441
1.74466 4.71008 5.25474 0.0275963564211 1442
1.73908 4.91 5.44908 0.0196505407239 1443
1.7357 5.10997 5.64567 0.0137493040878 1444
1.73375 5.30996 5.84371 0.00944283170044 1445
1.73288 5.45996 5.99284 0.00702651191744 1446
5.79512 2.40779 6.70291 0.000459699943643 1447
5.64512 2.40683 6.55195 0.000788166925068 1448
5.49512 2.40574 6.40086 0.00124170602402 1449
5.29513 2.40414 6.19927 0.00211881323196 1450
5.14513 2.40291 6.04804 0.00305987460504 1451
4.94514 2.40149 5.84663 0.00484914485283 1452
4.79514 2.40087 5.69601 0.00673384766643 1453
4.64514 2.40101 5.54615 0.00923724373107 1454
4.44515 2.40321 5.34836 0.0138331597284 1455
4.24525 2.40916 5.15441 0.0202988595663 1456
4.09547 2.41731 5.01278 0.0266796512198 1457
3.94599 2.42974 4.87573 0.0349397340505 1458
3.74761 2.45489 4.7025 0.0480042416061 1459
3.6 2.48151 4.58151 0.0598140430058 1460
3.40571 2.52879 4.4345 0.0781662004937 1461
3.2154 2.59016 4.30556 0.0987587632784 1462
3.03003 2.66512 4.19515 0.120506377993 1463
2.8946 2.72959 4.12419 0.136643831855 1464
2.76253 2.80068 4.06321 0.15156910204 1465
2.63422 2.87835 4.01257 0.163266225701 1466
2.4703 2.99284 3.96314 0.177152037164 1467
2.35433 3.08793 3.94226 0.182521565491 1468
2.24624 3.19188 3.93812 0.182190666522 1469
2.14804 3.3052 3.95324 0.175990424004 1470
2.03555 3.47039 4.00594 0.159839848958 1471
1.94599 3.64907 4.09506 0.13777963534 1472
1.87842 3.83721 4.21563 0.113567738858 1473
1.84025 3.98225 4.3225 0.0958596884184 1474
1.80279 4.17867 4.48146 0.0743236678642 1475
1.77713 4.377 4.65413 0.0562121564001 1476
1.75999 4.57625 4.83624 0.0416761632315 1477
1.75117 4.72599 4.97716 0.0329949853243 1478
1.74487 4.87586 5.12073 0.0247713000566 1479
1.73929 5.07578 5.31507 0.0173041059341 1480
1.7359 5.27575 5.51165 0.0118584127621 1481
1.73392 5.47574 5.70966 0.00795920690555 1482
1.73281 5.67573 5.90854 0.00521112267267 1483
5.943 2.40866 6.55166 0.000322708383237 1484
5.793 2.40795 6.40095 0.00061680711513 1485
5.643 2.40718 6.25018 0.00102635623057 1486
5.493 2.40639 6.09939 0.0015929106334 1487
5.343 2.40567 5.94867 0.0023717671229 1488
5.14301 2.40506 5.74807 0.0038687261636 1489
4.99301 2.40516 5.59817 0.00546135214958 1490
4.84301 2.4061 5.44911 0.00759394293023 1491
4.64304 2.4095 5.25254 0.0115413963589 1492
4.44318 2.41682 5.06 0.0171369110493 1493
4.29347 2.42613 4.9196 0.0226871041245 1494
4.09444 2.44564 4.74008 0.0322315436009 1495
3.89675 2.47573 4.57248 0.0449131049381 1496
3.75 2.50673 4.45673 0.0558693384714 1497
3.60516 2.54567 4.35083 0.0682510320002 1498
3.46274 2.5927 4.25544 0.081961316706 1499
3.32308 2.64739 4.17047 0.0966980629762 1500
3.1413 2.73071 4.07201 0.117229819047 1501
3.00812 2.79971 4.00783 0.132762688553 1502
2.46356 3.15319 3.81675 0.184908082582 1503
2.31266 3.28435 3.79701 0.188429950071 1504
2.17621 3.43043 3.80664 0.18196521187 1505
2.05903 3.59234 3.85137 0.166325352578 1506
1.96426 3.7683 3.93256 0.144306806905 1507
1.90798 3.9073 4.01528 0.125810963252 1508
1.86327 4.05045 4.11372 0.107200199139 1509
1.81883 4.2454 4.26423 0.0838695574611 1510
1.78803 4.44298 4.43101 0.0637546840428 1511
1.77166 4.59208 4.56374 0.0510770655972 1512
1.75965 4.7416 4.70125 0.0404749065914 1513
1.74863 4.94129 4.88992 0.0280011157447 1514
1.74165 5.14116 5.08281 0.0194243952207 1515
1.73735 5.34112 5.27847 0.0131824106211 1516
1.73478 5.5411 5.47588 0.00874094827489 1517
1.7336 5.6911 5.6247 0.00631123817738 1518
1.73265 5.89109 5.82374 0.00396889071131 1519
6.09067 2.40922 6.39989 0.000247689731662 1520
5.94067 2.40869 6.24936 0.000535801683387 1521
5.79067 2.40814 6.09881 0.000940851522664 1522
5.64067 2.40763 5.9483 0.00150543303426 1523
5.49067 2.40728 5.79795 0.00228593596036 1524
5.34067 2.40723 5.6479 0.00335583007654 1525
5.14068 2.40807 5.44875 0.00539664492965 1526
4.99069 2.40983 5.30052 0.00754212983664 1527
4.84072 2.41313 5.15385 0.0103721905217 1528
4.64089 2.42115 4.96204 0.0154872024352 1529
4.49122 2.43105 4.82227 0.0205447328808 1530
4.34192 2.44548 4.6874 0.0268188040704 1531
4.14398 2.47392 4.5179 0.0372657881322 1532
3.94837 2.51538 4.36375 0.0501739853573 1533
3.80406 2.55623 4.26029 0.061391283705 1534
3.61593 2.62395 4.13988 0.0782196029265 1535
3.47842 2.68385 4.06227 0.091754217205 1536
3.29966 2.7735 3.97316 0.110757921577 1537
2.27494 3.48265 3.65759 0.19549304658 1538
2.14304 3.63284 3.67588 0.185299316766 1539
2.05714 3.75575 3.71289 0.171993645635 1540
1.96239 3.93173 3.79412 0.149048913082 1541
1.89013 4.11811 3.90824 0.123453534969 1542
1.83759 4.31101 4.0486 0.0982418244643 1543
1.80871 4.45819 4.1669 0.081006891509 1544
1.78101 4.65624 4.33725 0.0610797319202 1545
1.7625 4.85537 4.51787 0.0449725104272 1546
1.75042 5.055 4.70542 0.031081988884 1547
1.74274 5.25485 4.89759 0.021466202607 1548
1.73799 5.45479 5.09278 0.0144543392752 1549
1.73514 5.65477 5.28991 0.00947424085054 1550
1.7335 5.85476 5.48826 0.00601728714354 1551
1.73277 6.00476 5.63753 0.0041692204309 1552
6.23832 2.40953 6.24785 0.000246751729167 1553
6.08832 2.4091 6.09742 0.000560759498854 1554
5.93832 2.40868 5.947 0.00100479637318 1555
5.78832 2.40835 5.79667 0.001625665758 1556
5.63832 2.40823 5.64655 0.00248445609078 1557
5.48832 2.40848 5.4968 0.00365920404282 1558
5.28833 2.40987 5.2982 0.00588676458008 1559
5.08836 2.41333 5.10169 0.00913092444942 1560
4.88849 2.42029 4.90878 0.0137178194151 1561
4.73874 2.42898 4.76772 0.018243493647 1562
4.53959 2.44727 4.58686 0.0255024920047 1563
4.3417 2.476 4.4177 0.0358413366861 1564
4.19481 2.50631 4.30112 0.0445529501791 1565
4.00232 2.5604 4.16272 0.057917134484 1566
3.81521 2.63086 4.04607 0.0729483443998 1567
3.67899 2.69363 3.97262 0.0850964123727 1568
2.11274 3.83452 3.54726 0.191572466494 1569
2.00596 4.00346 3.60942 0.17067108852 1570
1.94104 4.13863 3.67967 0.151777461765 1571
1.87382 4.32689 3.80071 0.125095457425 1572
1.83611 4.47205 3.90816 0.105462992223 1573
1.7994 4.66861 4.06801 0.0816902141564 1574
1.77982 4.81732 4.19714 0.0661844631658 1575
1.76153 5.01647 4.378 0.0489445300679 1576
1.74967 5.21611 4.56578 0.0337691545187 1577
1.74218 5.41597 4.75815 0.0232901214524 1578
1.73758 5.61591 4.95349 0.0156166237252 1579
1.7354 5.7659 5.1013 0.0113458117447 1580
1.7336 5.96589 5.29949 0.00718997252216 1581
1.7328 6.11589 5.44869 0.00496578805214 1582
6.38607 2.40961 6.09568 0.000343081550282 1583
6.23607 2.4092 5.94527 0.000720959421637 1584
6.08607 2.40884 5.79491 0.00125460258122 1585
5.93607 2.40858 5.64465 0.00199833777474 1586
5.78607 2.40856 5.49463 0.00302138778765 1587
5.63607 2.40897 5.34504 0.00440970883739 1588
5.43608 2.41066 5.14674 0.00700949388792 1589
5.2861 2.41334 4.99944 0.00967664261618 1590
5.13617 2.41789 4.85406 0.013101875492 1591
4.93645 2.42828 4.66473 0.0190632070781 1592
4.78697 2.4407 4.52767 0.02471089911 1593
4.5886 2.46594 4.35454 0.0339052841863 1594
4.39235 2.50428 4.19663 0.0448795620375 1595
4.2 2.55882 4.05882 0.0574579719774 1596
4.01357 2.63104 3.94461 0.0711939647995 1597
3.83437 2.71972 3.85409 0.0857190376022 1598
1.96144 4.25165 3.51309 0.172265662357 1599
1.90432 4.3903 3.59462 0.151894485149 1600
1.8592 4.53332 3.69252 0.131068836684 1601
1.8148 4.72827 3.84307 0.104474830327 1602
1.79094 4.87635 3.96729 0.0864068609139 1603
1.76854 5.07507 4.14361 0.0655870825484 1604
1.75394 5.27453 4.32847 0.0462019083285 1605
1.74659 5.42435 4.47094 0.0356391593671 1606
1.74013 5.62424 4.66437 0.0245759355381 1607
1.73702 5.77421 4.81123 0.0182374971166 1608
1.73443 5.97419 5.00862 0.0119151307438 1609
1.73326 6.12419 5.15745 0.0084553525347 1610
1.73236 6.32418 5.35654 0.00514308763376 1611
6.53394 2.40945 5.94339 0.00057280470845 1612
6.38394 2.40902 5.79296 0.00106184893708 1613
6.23394 2.40863 5.64257 0.00174721782677 1614
6.08394 2.40835 5.49229 0.00269400811461 1615
5.93394 2.40832 5.34226 0.00398287712211 1616
5.78394 2.40874 5.19268 0.00571085739353 1617
5.58395 2.41051 4.99446 0.00889255902783 1618
5.38399 2.41467 4.79866 0.0133433347457 1619
5.18417 2.42284 4.60701 0.0193410840166 1620
5.03451 2.43298 4.46749 0.0249759777538 1621
4.83567 2.45429 4.28996 0.034082661861 1622
4.63855 2.48785 4.1264 0.0447769260069 1623
4.44485 2.53738 3.98223 0.0568575350215 1624
4.30321 2.58667 3.88988 0.0664427813976 1625
4.121 2.66894 3.78994 0.0794679332691 1626
1.87328 4.64142 3.5147 0.155195572177 1627
1.82376 4.83512 3.65888 0.126159690997 1628
1.79711 4.98272 3.77983 0.105499253755 1629
1.7774 5.13141 3.90881 0.0865868527708 1630
1.76307 5.28072 4.04379 0.0698079191482 1631
1.75011 5.48029 4.2304 0.0510032014747 1632
1.74203 5.68012 4.42215 0.0361750459213 1633
1.73815 5.83007 4.56822 0.02742238362 1634
1.73556 5.98005 4.71561 0.0204379085822 1635
1.73345 6.18004 4.91349 0.0134296440035 1636
1.73234 6.38003 5.11237 0.00850812048533 1637
1.73189 6.53003 5.26192 0.00586474120664 1638
6.68181 2.40906 5.79087 0.000988994099129 1639
6.53181 2.40854 5.64035 0.0016506313862 1640
6.38181 2.40805 5.48986 0.00256684610964 1641
6.23181 2.40767 5.33948 0.0038168288139 1642
6.08181 2.40752 5.18933 0.00549617471047 1643
5.93181 2.40782 5.03963 0.00771523449019 1644
5.73182 2.40946 4.84128 0.011724161958 1645
5.53186 2.41359 4.64545 0.0171990565372 1646
5.33204 2.42195 4.45399 0.0243660424661 1647
5.13263 2.43706 4.26969 0.03329401614 1648
4.93426 2.46234 4.0966 0.0439910231686 1649
4.78693 2.49041 3.97734 0.0529240861466 1650
4.5941 2.5432 3.8373 0.0655152881054 1651
4.4079 2.61593 3.72383 0.078120717494 1652
4.27406 2.68358 3.65764 0.0871525167139 1653
1.86055 4.84441 3.40496 0.170374288244 1654
1.81387 5.03882 3.55269 0.139960383924 1655
1.78241 5.23629 3.7187 0.110898056265 1656
1.76619 5.38541 3.8516 0.0911428855256 1657
1.75462 5.53496 3.98958 0.0735858027034 1658
6.84982 2.40851 5.65833 0.00156523849776 1665
6.69982 2.40785 5.50767 0.00244210214629 1666
6.54982 2.40718 5.357 0.00364179961651 1667
6.39982 2.40657 5.20639 0.00525885865235 1668
6.24982 2.40617 5.05599 0.00740374389058 1669
6.09982 2.40616 4.90598 0.0102006266341 1670
5.94982 2.40686 4.75668 0.0137793706302 1671
5.74985 2.40971 4.55956 0.0199794987884 1672
5.59991 2.41416 4.41407 0.0258281965688 1673
5.4501 2.42166 4.27176 0.0327325388727 1674
5.25084 2.43865 4.08949 0.0434983216932 1675
5.05294 2.46723 3.92017 0.0558816621587 1676
4.90636 2.49896 3.80532 0.0658010639574 1677
4.71547 2.55832 3.67379 0.0790612946188 1678
4.57742 2.61688 3.5943 0.0884024957989 1679
4.44499 2.68724 3.53223 0.0967924844116 1680
6.99062 2.40758 5.4982 0.00262162553981 1682
6.84062 2.40671 5.34733 0.00386635836976 1683
6.69062 2.40579 5.19641 0.00554293451197 1684
6.49063 2.40465 4.99528 0.00865169467807 1685
6.34063 2.40404 4.84467 0.0118094320008 1686
6.19063 2.40393 4.69456 0.0158278315159 1687
6.04063 2.4047 4.54533 0.0208360090902 1688
5.84066 2.4081 4.34876 0.029223031338 1689
5.69076 2.41353 4.20429 0.0368514859814 1690
5.49123 2.42692 4.01815 0.0486549053088 1691
5.34217 2.44366 3.88583 0.0585675927241 1692
5.14531 2.47863 3.72394 0.072764250159 1693
4.95278 2.53243 3.58521 0.0870817768554 1694
4.81319 2.58722 3.50041 0.0970452137624 1695
7.13481 2.40634 5.34115 0.00420192742214 1696
6.98481 2.40519 5.19 0.00596237041602 1697
6.83481 2.40395 5.03876 0.00829645182941 1698
6.63482 2.40233 4.83715 0.012540661808 1699
6.48482 2.40133 4.68615 0.0168655938994 1700
6.28483 2.40084 4.48567 0.0241233264959 1701
6.13483 2.40172 4.33655 0.0309435270516 1702
5.93488 2.40594 4.14082 0.041927857298 1703
5.78504 2.41279 3.99783 0.0515360916107 1704
5.6355 2.42444 3.85994 0.0621995776579 1705
5.48664 2.44278 3.72942 0.0738926980056 1706
5.33915 2.46999 3.60914 0.0844505898951 1707
5.14663 2.52377 3.4704 0.0992624878253 1708
5.00728 2.57916 3.38644 0.109557084478 1709
7.26135 2.40457 5.16592 0.00687579012306 1710
7.11135 2.40305 5.0144 0.00946827003116 1711
6.91137 2.40085 4.81222 0.0141682764455 1712
6.76137 2.39921 4.66058 0.0188501973061 1713
6.56138 2.39745 4.45883 0.0268961319312 1714
6.41138 2.39695 4.30833 0.0343907492825 1715
6.21139 2.39854 4.10993 0.0464297241742 1716
6.0115 2.40487 3.91637 0.0603815394143 1717
5.86183 2.41475 3.77658 0.0716311717992 1718
5.66329 2.43848 3.60177 0.086883155236 1719
5.04923 2.46805 7.51728 0.00240884881879 1723
4.89929 2.46372 7.36301 0.00341734595861 1724
4.74938 2.45848 7.20786 0.00477217902192 1725
4.59951 2.45223 7.05174 0.00657521339903 1726
4.39976 2.44225 6.84201 0.00989481852331 1727
4.20011 2.43043 6.63054 0.0145983080093 1728
4.00056 2.41714 6.4177 0.021128405006 1729
3.85092 2.40669 6.25761 0.027533013036 1730
3.65137 2.39325 6.04462 0.0385333999151 1731
3.45168 2.38231 5.83399 0.0529136082685 1732
3.25176 2.37692 5.62868 0.0711614700938 1733
3.10178 2.37902 5.4808 0.0877158291208 1734
2.90244 2.39448 5.29692 0.110798774234 1735
2.7546 2.41956 5.17416 0.129607737403 1736
2.61034 2.46036 5.0707 0.148249588737 1737
2.42997 2.54591 4.97588 0.168818488821 1738
2.31056 2.63637 4.94693 0.177214503492 1739
2.18175 2.78874 4.97049 0.175796238765 1740
2.10955 2.92008 5.02963 0.166481163564 1741
2.04136 3.1079 5.14926 0.147701329322 1742
1.99734 3.30291 5.30025 0.115242287346 1743
1.96991 3.50098 5.47089 0.0941141553586 1744
1.9568 3.6504 5.6072 0.0798225548042 1745
1.94816 3.80015 5.74831 0.0670229823691 1746
1.9427 3.95005 5.89275 0.0556274522992 1747
1.93875 4.15001 6.08876 0.0427964567138 1748
1.93717 4.35 6.28717 0.0323394076261 1749
1.9369 4.5 6.4369 0.0258954020109 1750
1.93708 4.65 6.58708 0.0205151762144 1751
1.9375 4.8 6.7375 0.0160739269523 1752
1.93804 4.95 6.88804 0.0124487013807 1753
5.19831 2.47185 7.37016 0.00174696074348 1754
4.99837 2.46719 7.16556 0.00283716337081 1755
4.84843 2.46285 7.01128 0.00399620369231 1756
4.64856 2.45581 6.80437 0.00617186519299 1757
4.49869 2.44956 6.64825 0.00842945362118 1758
4.34885 2.44254 6.49139 0.0113846458432 1759
4.14912 2.43224 6.28136 0.0167122485254 1760
3.99933 2.42424 6.12357 0.0220083481944 1761
3.79958 2.41421 5.91379 0.031214811465 1762
3.6497 2.40816 5.75786 0.0400013916483 1763
3.44975 2.40414 5.55389 0.0545430052127 1764
3.24981 2.40792 5.35773 0.0724698814931 1765
3.1002 2.41851 5.21871 0.0881005989141 1766
2.95154 2.43832 5.08986 0.105043074664 1767
2.80498 2.47007 4.97505 0.122517085057 1768
2.61641 2.5361 4.85251 0.14353118485 1769
2.48428 2.60686 4.79114 0.156293194096 1770
2.32847 2.73164 4.76011 0.164647492547 1771
2.23158 2.84596 4.77754 0.161945520736 1772
2.13129 3.01868 4.84997 0.150323199945 1773
2.06064 3.20562 4.96626 0.130871638601 1774
2.01305 3.39979 5.11284 0.109683767147 1775
1.98858 3.54777 5.23635 0.0940568189695 1776
1.96668 3.74654 5.41322 0.0751889639647 1777
1.95605 3.89616 5.55221 0.0627256779579 1778
1.94894 4.04599 5.69493 0.0517791676053 1779
1.94435 4.19592 5.84027 0.0423098591236 1780
1.9409 4.39589 6.03679 0.0318200561568 1781
1.93938 4.59588 6.23526 0.0235049592152 1782
1.93898 4.74588 6.38486 0.0185039970552 1783
1.93895 4.89588 6.53483 0.0144116236346 1784
1.93915 5.04588 6.68503 0.0110979951632 1785
1.93945 5.19588 6.83533 0.00844248544558 1786
5.34886 2.47486 7.22372 0.00125702815519 1787
5.1489 2.47129 7.02019 0.00210109448686 1788
4.99893 2.46797 6.8669 0.00300496228682 1789
4.84898 2.46405 6.71303 0.00422421871977 1790
4.64908 2.4579 6.50698 0.00650983327731 1791
4.49917 2.45265 6.35182 0.0088781933616 1792
4.29931 2.4451 6.14441 0.0131960957722 1793
4.09945 2.43762 5.93707 0.0192329183378 1794
3.89955 2.43145 5.731 0.0275780922557 1795
3.74957 2.42878 5.57835 0.0354114272393 1796
3.54959 2.4299 5.37949 0.0485803218283 1797
3.39972 2.436 5.23572 0.0606706649862 1798
3.20059 2.45432 5.05491 0.0796974895796 1799
3.0036 2.48848 4.89208 0.101346291319 1800
2.81143 2.54347 4.7549 0.123305716504 1801
2.6731 2.6013 4.6744 0.137403569597 1802
2.50143 2.70346 4.60489 0.152488777698 1803
2.38627 2.79941 4.58568 0.158061954013 1804
2.256 2.9508 4.6068 0.155887501077 1805
2.15479 3.12304 4.67783 0.143766770846 1806
2.08077 3.30869 4.78946 0.125063387619 1807
2.02911 3.50182 4.93093 0.104379721696 1808
1.99436 3.69873 5.09309 0.0844923176333 1809
1.97649 3.84766 5.22415 0.0710097031281 1810
1.96051 4.047 5.40751 0.0550265268636 1811
1.95276 4.1968 5.54956 0.0449296857862 1812
1.94758 4.34671 5.69429 0.0363053069497 1813
1.94343 4.54667 5.8901 0.0268976127186 1814
1.9417 4.69666 6.03836 0.021228571005 1815
1.94055 4.89665 6.2372 0.0152370224853 1816
1.94023 5.04665 6.38688 0.0117324197192 1817
1.94017 5.19665 6.53682 0.00892842473969 1818
1.94026 5.34665 6.68691 0.0067062950546 1819
5.4989 2.47719 7.07609 0.0008922968118 1820
5.29892 2.47448 6.8734 0.00155488686348 1821
5.14894 2.47199 6.72093 0.00226819246219 1822
4.94898 2.46802 6.517 0.00362823163377 1823
4.74904 2.46337 6.31241 0.00564148878928 1824
4.59908 2.45957 6.15865 0.00773767171527 1825
4.39915 2.4545 5.95365 0.0115809406243 1826
4.19919 2.4502 5.74939 0.0169976637558 1827
3.99921 2.44805 5.54726 0.0244643323497 1828
3.84921 2.44901 5.39822 0.0317222653422 1829
3.64934 2.45579 5.20513 0.0439696072161 1830
3.45 2.47174 5.02174 0.0594546799508 1831
3.30137 2.49187 4.89324 0.0731854016937 1832
3.1542 2.52076 4.77496 0.0884227248203 1833
2.96193 2.5755 4.63743 0.109853694722 1834
2.82239 2.63041 4.5528 0.125083042578 1835
2.64578 2.72397 4.46975 0.140943164536 1836
2.48442 2.84183 4.42625 0.152373529204 1837
2.34352 2.98348 4.427 0.154309425253 1838
2.25388 3.10365 4.45753 0.149393576314 1839
2.17891 3.23349 4.5124 0.139208347104 1840
2.10096 3.41753 4.61849 0.120739762122 1841
2.05714 3.56095 4.71809 0.105397020092 1842
2.01457 3.75631 4.87088 0.0853133735591 1843
1.98593 3.95422 5.04015 0.067170894139 1844
1.97121 4.10349 5.1747 0.0553392121239 1845
1.95802 4.30305 5.36107 0.0421251905053 1846
1.94999 4.50288 5.55287 0.0310008572455 1847
1.94531 4.70283 5.74814 0.022595987629 1848
1.94277 4.90281 5.94558 0.0161744460461 1849
1.94151 5.1028 6.14431 0.0113602747048 1850
1.94107 5.2528 6.29387 0.00859763338634 1851
1.9409 5.4028 6.4437 0.00642081237952 1852
5.64847 2.47896 6.92743 0.000619087665005 1853
5.49847 2.47748 6.77595 0.000995486844683 1854
5.34848 2.47574 6.62422 0.00151283738169 1855
5.1485 2.47299 6.42149 0.00250755663491 1856
4.94853 2.46985 6.21838 0.00399677774268 1857
4.79855 2.46739 6.06594 0.00556548369356 1858
4.59857 2.46433 5.8629 0.00848354364156 1859
4.39858 2.46228 5.66086 0.012674973706 1860
4.24858 2.46214 5.51072 0.0169162689722 1861
4.04861 2.46522 5.31383 0.0246137638193 1862
3.89873 2.47124 5.16997 0.0318638062741 1863
3.69933 2.48642 4.98575 0.0441330199477 1864
3.55048 2.50488 4.85536 0.0554403831243 1865
3.35389 2.54143 4.69532 0.0731407155471 1866
3.16101 2.59407 4.55508 0.0931220410678 1867
3.02005 2.64527 4.46532 0.108651571893 1868
2.83898 2.72999 4.36897 0.127834395072 1869
2.7098 2.80616 4.31596 0.138694479596 1870
2.58777 2.89331 4.28108 0.147488998397 1871
2.47446 2.99152 4.26598 0.152422302627 1872
2.33999 3.13935 4.27934 0.151520902813 1873
2.25363 3.26192 4.31555 0.144298255262 1874
2.1807 3.39293 4.37363 0.132737603339 1875
2.10402 3.57752 4.48154 0.113381373334 1876
2.04827 3.76951 4.61778 0.0927950750213 1877
2.01775 3.91636 4.73411 0.0780697914023 1878
1.98875 4.11421 4.90296 0.0604959601938 1879
1.97369 4.26345 5.03714 0.049229362735 1880
1.96291 4.41306 5.17597 0.0396441637063 1881
1.95336 4.61283 5.36619 0.0288335890446 1882
1.94878 4.76276 5.51154 0.0225560501456 1883
1.94498 4.96272 5.7077 0.0159991233088 1884
1.9429 5.16271 5.90561 0.0111328399399 1885
1.94185 5.3627 6.10455 0.00758261723903 1886
1.94147 5.5127 6.25417 0.00559130463701 1887
5.79764 2.48029 6.77793 0.000415864190318 1888
5.64764 2.47918 6.62682 0.000727487371671 1889
5.44765 2.47744 6.42509 0.00133511666251 1890
5.24766 2.47546 6.22312 0.00226033862981 1891
5.04767 2.4734 6.02107 0.00365387504401 1892
4.84768 2.47166 5.81934 0.0057272131249 1893
4.69768 2.47095 5.66863 0.00789838120943 1894
4.54768 2.47122 5.5189 0.0107653625319 1895
4.39769 2.47305 5.37074 0.0145086533009 1896
4.24775 2.47723 5.22498 0.0193298090832 1897
4.04806 2.48811 5.03617 0.0280928721736 1898
3.84903 2.50758 4.85661 0.0391688610803 1899
3.65148 2.53858 4.69006 0.0531854098717 1900
3.4567 2.58375 4.54045 0.0700567308386 1901
3.31339 2.62798 4.44137 0.0841357755862 1902
3.17323 2.68136 4.35459 0.0988968381038 1903
2.99231 2.76647 4.25878 0.118349176074 1904
2.8194 2.86686 4.18626 0.135290529974 1905
2.65611 2.98222 4.13833 0.146501563986 1906
2.54142 3.07885 4.12027 0.152397194514 1907
2.43504 3.18455 4.11959 0.154117332842 1908
2.30914 3.33977 4.14891 0.147739033144 1909
2.22864 3.46628 4.19492 0.137403224529 1910
2.14127 3.64605 4.28732 0.118792732686 1911
2.07574 3.83491 4.41065 0.097944148849 1912
2.02887 4.02928 4.55815 0.0777002591432 1913
1.99662 4.22663 4.72325 0.0597197745545 1914
1.97968 4.37567 4.85535 0.0482385436468 1915
1.96418 4.57505 5.03923 0.0356600154915 1916
1.95643 4.72485 5.18128 0.0281552527966 1917
1.94967 4.92474 5.37441 0.0195368593496 1918
1.94569 5.12469 5.57038 0.0135764844931 1919
1.94389 5.27468 5.71857 0.0101943192331 1920
1.94277 5.42468 5.86745 0.00755602261931 1921
1.94209 5.57468 6.01677 0.0055160093266 1922
1.94172 5.72468 6.1664 0.00395144974326 1923
5.94654 2.48125 6.62779 0.000270621083157 1924
5.79654 2.48042 6.47696 0.000543176694259 1925
5.59655 2.47916 6.27571 0.00108001506887 1926
5.44655 2.47815 6.1247 0.00166559399435 1927
5.29655 2.4772 5.97375 0.00246960056877 1928
5.09656 2.47626 5.77282 0.00401268147953 1929
4.94656 2.47613 5.62269 0.00565210089357 1930
4.79656 2.47688 5.47344 0.00784472716973 1931
4.64657 2.47906 5.32563 0.0107438402333 1932
4.44668 2.4854 5.13208 0.0160137270543 1933
4.24707 2.49769 4.94476 0.0232999684322 1934
4.0978 2.51242 4.81022 0.0303266248478 1935
3.9 2.54179 4.64179 0.0423953318728 1936
3.75322 2.57263 4.52585 0.0528652555234 1937
3.60849 2.61197 4.42046 0.0646809258246 1938
3.46646 2.66015 4.32661 0.0777117494465 1939
3.28215 2.73766 4.21981 0.0961605377952 1940
2.40101 3.38321 3.98422 0.155463992969 1941
2.28134 3.5433 4.02464 0.144784115038 1942
2.20545 3.67263 4.07808 0.132161916749 1943
2.14217 3.80858 4.15075 0.117105884456 1944
2.07661 3.99743 4.27404 0.095682881491 1945
2.02965 4.19178 4.42143 0.075172635117 1946
2.00424 4.3396 4.54384 0.0613351072788 1947
1.98031 4.53814 4.71845 0.0457316730257 1948
1.96799 4.68763 4.85562 0.0361748708456 1949
1.95691 4.88732 5.04423 0.0261040033787 1950
1.95009 5.0872 5.23729 0.0175788123066 1951
1.94603 5.28716 5.43319 0.0119512579333 1952
1.94373 5.48714 5.63087 0.00793203651236 1953
1.94273 5.63714 5.77987 0.00572409641944 1954
1.94214 5.78714 5.92928 0.00404703544603 1955
1.94181 5.93714 6.07895 0.00278401126109 1956
6.09531 2.48189 6.4772 0.000181347071166 1957
5.94531 2.48125 6.32656 0.000440548240954 1958
5.79531 2.48056 6.17587 0.00080570724357 1959
5.64531 2.47988 6.02519 0.00131562066706 1960
5.49531 2.47929 5.8746 0.00202211882118 1961
5.34531 2.47894 5.72425 0.00299320340363 1962
5.19531 2.47905 5.57436 0.00431610135063 1963
4.99532 2.48051 5.37583 0.00681853195253 1964
4.79536 2.48455 5.17991 0.010461676329 1965
4.59554 2.49288 4.98842 0.0156204503937 1966
4.39611 2.50783 4.80394 0.0226853117385 1967
4.19764 2.53228 4.62992 0.0323594079837 1968
4.05 2.5587 4.5087 0.0408732899576 1969
3.90407 2.59333 4.3974 0.0507218821015 1970
3.71337 2.65343 4.2668 0.0656325581105 1971
3.52835 2.72922 4.15757 0.0821906259932 1972
2.40183 3.54516 3.84699 0.160019988153 1973
2.31022 3.66388 3.8741 0.151695429665 1974
2.20605 3.83445 3.9405 0.134556062029 1975
2.14253 3.97029 4.01282 0.118846505105 1976
2.07671 4.15905 4.13576 0.0967169457092 1977
2.02962 4.35337 4.28299 0.0756473300705 1978
1.99724 4.55069 4.44793 0.0571484754395 1979
1.98025 4.69972 4.57997 0.0455176901036 1980
1.9647 4.89911 4.76381 0.0329677429183 1981
1.95488 5.09886 4.95374 0.0235165206789 1982
1.95012 5.24879 5.09891 0.016791899035 1983
1.94608 5.44874 5.29482 0.0111919508078 1984
1.94423 5.59873 5.44296 0.00810296260548 1985
1.94306 5.74873 5.59179 0.00575582407274 1986
1.94235 5.89873 5.74108 0.00399123320629 1987
1.94185 6.09872 5.94057 0.00232123018887 1988
6.24406 2.48227 6.32633 0.000155834219924 1989
6.09406 2.48174 6.1758 0.000429789801785 1990
5.94406 2.4812 6.02526 0.000818768889387 1991
5.79406 2.48071 5.87477 0.00136483362784 1992
5.64406 2.48038 5.72444 0.00212343666386 1993
5.49406 2.48036 5.57442 0.00316624569372 1994
5.29407 2.48126 5.37533 0.00515715241672 1995
5.14408 2.48313 5.22721 0.00724692319356 1996
4.99412 2.48662 5.08074 0.00999425671318 1997
4.79431 2.4951 4.88941 0.0149288768857 1998
4.64468 2.50561 4.75029 0.0197667980354 1999
4.49548 2.52104 4.61652 0.0258677287289 2000
4.34707 2.54275 4.48982 0.0329539030364 2001
4.15139 2.58386 4.33525 0.0442447205513 2002
3.95983 2.64112 4.20095 0.0574093312835 2003
3.77412 2.71519 4.08931 0.0721233521298 2004
2.31201 3.82468 3.73669 0.158704651678 2005
2.23115 3.95096 3.78211 0.145737703412 2006
2.14285 4.13027 3.87312 0.124411982313 2007
2.07648 4.31884 3.99532 0.101420522513 2008
2.02912 4.51309 4.14221 0.0794568395278 2009
1.99668 4.7104 4.30708 0.0600706841274 2010
1.97518 4.90923 4.48441 0.0442059375467 2011
1.96425 5.05883 4.62308 0.0346043142228 2012
1.95653 5.20863 4.76516 0.0268348523903 2013
1.94983 5.40851 4.95834 0.0173085914694 2014
1.94666 5.55848 5.10514 0.0126848826414 2015
1.94407 5.75846 5.30253 0.00814422285778 2016
1.94266 5.95845 5.50111 0.00502079310916 2017
1.94209 6.10845 5.65054 0.00336667021207 2018
6.39288 2.4824 6.17528 0.000211734589065 2019
6.24288 2.48191 6.02479 0.000533360430229 2020
6.09288 2.48144 5.87432 0.000990469209927 2021
5.94288 2.48105 5.72393 0.00163144852303 2022
5.79288 2.48084 5.57372 0.0025188523496 2023
5.64288 2.48099 5.42387 0.00373148574773 2024
5.49288 2.48178 5.27466 0.00536539491604 2025
5.34289 2.48357 5.12646 0.00753340143708 2026
5.14296 2.48849 4.93145 0.0114719080285 2027
4.9931 2.49505 4.78815 0.0153797871007 2028
4.79364 2.50959 4.60323 0.0220788183242 2029
4.59512 2.5336 4.42872 0.0306203787295 2030
4.44746 2.55994 4.3074 0.0382278138387 2031
4.30165 2.59505 4.1967 0.0467975445157 2032
4.11163 2.65721 4.06884 0.0594239464463 2033
3.92839 2.73718 3.96557 0.0730239495836 2034
2.20881 4.15307 3.66188 0.150920261873 2035
2.12487 4.33447 3.75934 0.128164896435 2036
2.07639 4.47638 3.85277 0.110145379343 2037
2.0285 4.67049 3.99899 0.0868828640328 2038
2.00281 4.81826 4.12107 0.0711271619341 2039
1.98392 4.96706 4.25098 0.0572572971405 2040
1.96667 5.1663 4.43297 0.0419366119568 2041
1.95584 5.366 4.62184 0.0284408220527 2042
1.9506 5.51591 4.76651 0.0213272694115 2043
1.94708 5.66587 4.91295 0.0157128050497 2044
1.94419 5.86585 5.11004 0.0101471276121 2045
1.94264 6.06584 5.30848 0.00628900489192 2046
1.94201 6.21584 5.45785 0.00423803974381 2047
1.94167 6.36584 5.60751 0.00273050877011 2048
6.54178 2.48229 6.02407 0.000377991062183 2049
6.39178 2.48179 5.87357 0.000787772306595 2050
6.24178 2.48131 5.72309 0.00136666187642 2051
6.09178 2.48091 5.57269 0.00217251539446 2052
5.94178 2.48071 5.42249 0.00327825812404 2053
5.79178 2.4809 5.27268 0.00477304194723 2054
5.59179 2.48226 5.07405 0.00755415452791 2055
5.39182 2.48586 4.87768 0.0114944066933 2056
5.19196 2.49328 4.68524 0.0168779573657 2057
4.99244 2.50685 4.49929 0.0238983934776 2058
4.84331 2.52291 4.36622 0.0303233976331 2059
4.69507 2.54576 4.24083 0.037718181181 2060
4.54839 2.57705 4.12544 0.0459459408719 2061
4.35685 2.63431 3.99116 0.0578696718437 2062
4.21754 2.68984 3.90738 0.0672110724353 2063
4.08285 2.7558 3.83865 0.0766606374024 2064
2.12654 4.49037 3.61691 0.141979106766 2065
2.06299 4.6799 3.74289 0.116996378035 2066
2.01847 4.87482 3.89329 0.0929639086906 2067
1.99492 5.02295 4.01787 0.0766220686986 2068
1.97327 5.22176 4.19503 0.05781338915 2069
1.95959 5.42128 4.38087 0.0400415225872 2070
1.95124 5.6211 4.57234 0.0278819316753 2071
1.94732 5.77105 4.71837 0.0208157026098 2072
1.94476 5.92103 4.86579 0.015251967026 2073
1.94277 6.12102 5.06379 0.00975271231008 2074
1.94179 6.32101 5.2628 0.00595712504093 2075
1.94144 6.47101 5.41245 0.00394910631349 2076
6.6907 2.48194 5.87264 0.0006975898257 2077
6.5407 2.48137 5.72207 0.00124766861085 2078
6.3907 2.4808 5.5715 0.00201612860089 2079
6.2407 2.48031 5.42101 0.00307354043348 2080
6.0907 2.48001 5.27071 0.00450657190967 2081
5.9407 2.48011 5.12081 0.00641730674171 2082
5.74071 2.48138 4.92209 0.00990847015377 2083
5.54074 2.48499 4.72573 0.0147415291663 2084
5.34089 2.49265 4.53354 0.0211730098893 2085
5.14141 2.50685 4.34826 0.0293449729742 2086
4.99238 2.52382 4.2162 0.0369277471472 2087
4.7954 2.55812 4.05352 0.0474748974655 2088
4.65 2.59489 3.94489 0.0563484256232 2089
4.46139 2.66114 3.82253 0.06845409036 2090
4.28116 2.74762 3.72878 0.08020636909 2091
2.06421 4.83417 3.59838 0.134706891088 2092
2.02813 4.97974 3.70787 0.114967643471 2093
1.9941 5.17678 3.87088 0.0902063448604 2094
1.97668 5.32576 4.00244 0.0736347255066 2095
1.96116 5.52514 4.1863 0.0547940388713 2096
1.95176 5.72492 4.37668 0.0376924783564 2097
1.94629 5.92484 4.57113 0.0260449579963 2098
1.9433 6.12482 4.76812 0.0174210197386 2099
1.94178 6.32481 4.96659 0.0112431700902 2100
1.94123 6.47481 5.11604 0.00787292850996 2101
1.94099 6.62481 5.2658 0.00534732804807 2102
6.83947 2.48135 5.72082 0.00123295069322 2103
6.68947 2.48064 5.57011 0.00199213190367 2104
6.53947 2.47991 5.41938 0.00303812476645 2105
6.33948 2.47904 5.21852 0.00503105167621 2106
6.18948 2.47865 5.06813 0.0071114593209 2107
6.03948 2.47873 4.91821 0.00982717078093 2108
5.88948 2.47965 4.76913 0.0133045159488 2109
5.68951 2.4831 4.57261 0.0193314073598 2110
5.48967 2.49084 4.38051 0.0270705742659 2111
5.34002 2.50107 4.24109 0.0341019996117 2112
5.19085 2.51675 4.1076 0.0421081153977 2113
4.99357 2.5493 3.94287 0.0539828409385 2114
4.84789 2.58494 3.83283 0.063386405436 2115
4.65901 2.65037 3.70938 0.0757786503406 2116
4.52303 2.71359 3.63662 0.0844047454262 2117
2.04054 5.08536 3.5259 0.139462121807 2118
2.00949 5.23209 3.64158 0.119019067334 2119
1.98092 5.43 3.81092 0.0932477870719 2120
1.9667 5.57932 3.94602 0.0759203258497 2121
1.95691 5.729 4.08591 0.0607134236153 2122
1.9487 5.92883 4.27753 0.0438368235124 2123
1.94413 6.12877 4.4729 0.0307825495761 2124
1.94222 6.27876 4.62098 0.0228292788702 2125
1.94114 6.42876 4.7699 0.0167883353599 2126
1.94051 6.62875 4.96926 0.0107977495777 2127
1.94039 6.77875 5.11914 0.00754086326295 2128
6.97209 2.48039 5.55248 0.00217049284335 2129
6.7721 2.47915 5.35125 0.00371364194511 2130
6.6221 2.47819 5.20029 0.00535202147968 2131
6.4721 2.47729 5.04939 0.0075271172553 2132
6.3221 2.47664 4.89874 0.0103654843116 2133
6.1721 2.47649 4.74859 0.0140010592793 2134
5.97211 2.4778 4.54991 0.0203079147506 2135
5.77216 2.48226 4.35442 0.0284927766588 2136
5.57242 2.49223 4.16465 0.03855662634 2137
5.37334 2.51109 3.98443 0.0504032311197 2138
5.22507 2.53374 3.85881 0.0601858278298 2139
5.03039 2.57922 3.70961 0.0737198009619 2140
4.84194 2.64586 3.5878 0.0866737299644 2141
7.14347 2.47935 5.42282 0.00328841650667 2146
6.94348 2.47777 5.22125 0.00534858111751 2147
6.74349 2.47606 5.01955 0.00836235894416 2148
6.59349 2.47483 4.86832 0.0114373277032 2149
6.3935 2.47366 4.66716 0.0168917604414 2150
6.2435 2.47357 4.51707 0.0221703809617 2151
6.0935 2.47477 4.36827 0.0285766667846 2152
5.89357 2.47981 4.17338 0.0389277779666 2153
5.74378 2.48771 4.03149 0.0479747451213 2154
5.54473 2.50685 3.85158 0.0615618793715 2155
5.34761 2.54033 3.68794 0.0756487148297 2156
5.15486 2.59332 3.54818 0.0899708202409 2157
4.97 2.66932 3.43932 0.102853793547 2158
7.27101 2.47764 5.24865 0.00543344146476 2159
7.07102 2.47558 5.0466 0.00844398037752 2160
6.87103 2.47334 4.84437 0.0127439529356 2161
6.67104 2.47121 4.64225 0.0186835176857 2162
6.47105 2.46987 4.44092 0.0265717461844 2163
6.32105 2.47006 4.29111 0.0339232238932 2164
6.17106 2.47211 4.14317 0.0424826175911 2165
5.97122 2.47975 3.95097 0.0555296926214 2166
5.77195 2.49653 3.76848 0.0698640148629 2167
5.62353 2.51811 3.64164 0.0809851114275 2168
5.42882 2.56338 3.4922 0.0953551471121 2169
5.02253 2.5379 7.56043 0.00254576679277 2178
4.82264 2.53131 7.35395 0.00403184644707 2179
4.62282 2.52297 7.14579 0.00621977969758 2180
4.42308 2.51274 6.93582 0.00938454350452 2181
4.27334 2.50387 6.77721 0.0126064865646 2182
4.07377 2.49076 6.56453 0.0183685751408 2183
3.87425 2.47697 6.35122 0.026251377402 2184
3.67467 2.46403 6.1387 0.0368530966324 2185
3.52487 2.45629 5.98116 0.0468106047783 2186
3.37494 2.4518 5.82674 0.0588146037985 2187
3.22495 2.45251 5.67746 0.0730571359976 2188
3.02547 2.46602 5.49149 0.0947453655814 2189
2.87747 2.49011 5.36758 0.111738726479 2190
2.73328 2.53109 5.26437 0.12883821827 2191
2.59717 2.59373 5.1909 0.14396156158 2192
2.4394 2.71566 5.15506 0.155949754219 2193
2.34638 2.83305 5.17943 0.156286146603 2194
2.25787 3.012 5.26987 0.146340909015 2195
2.21367 3.15527 5.36894 0.123952676954 2196
2.17591 3.35159 5.5275 0.103587629802 2197
2.15873 3.50059 5.65932 0.0891508950839 2198
2.14557 3.70014 5.84571 0.0717234374425 2199
2.13955 3.90004 6.03959 0.056641952761 2200
2.13772 4.10003 6.23775 0.0438277679177 2201
2.13791 4.25003 6.38794 0.0357522987841 2202
2.13885 4.40003 6.53888 0.0288511601517 2203
2.14063 4.60002 6.74065 0.0213037667992 2204
2.14256 4.80001 6.94257 0.0154083920007 2205
2.14435 5.0 7.14435 0.0108995348984 2206
5.1979 2.54268 7.44058 0.00172775844382 2207
5.04794 2.53904 7.28698 0.0024967544973 2208
4.84803 2.533 7.08103 0.00396026342799 2209
4.69813 2.5275 6.92563 0.00550043839092 2210
4.49832 2.51884 6.71716 0.00835830112116 2211
4.29857 2.50883 6.5074 0.0124461514878 2212
4.09887 2.498 6.29687 0.0181763857339 2213
3.94908 2.48994 6.13902 0.0238388593507 2214
3.7493 2.48066 5.92996 0.0336117004295 2215
3.59937 2.47612 5.77549 0.0428616720164 2216
3.39939 2.47604 5.57543 0.0579420555848 2217
3.24956 2.48298 5.43254 0.071386224689 2218
3.10041 2.49868 5.29909 0.0864446244283 2219
2.90459 2.53873 5.14332 0.107918096693 2220
2.71746 2.60856 5.02602 0.127544722678 2221
2.58864 2.6851 4.97374 0.138370256898 2222
2.44208 2.82048 4.96256 0.144886941183 2223
2.35563 2.94287 4.9985 0.140367868792 2224
2.27133 3.12394 5.09527 0.128838037898 2225
2.22759 3.26737 5.19496 0.115257823291 2226
2.18862 3.46346 5.35208 0.0965357633405 2227
2.16995 3.61228 5.48223 0.0823723040564 2228
2.15767 3.76177 5.61944 0.0696480813763 2229
2.14998 3.91157 5.76155 0.0582110528793 2230
2.14454 4.11149 5.95603 0.0450591822545 2231
2.1428 4.26148 6.10428 0.0367274484662 2232
2.14231 4.41148 6.25379 0.0296211079156 2233
2.14259 4.56148 6.40407 0.0236352821608 2234
2.14329 4.71148 6.55477 0.0186534346818 2235
2.14451 4.91147 6.75598 0.0133649916797 2236
2.14546 5.06147 6.90693 0.0102604179415 2237
5.34847 2.54589 7.29436 0.00123443602335 2238
5.14851 2.542 7.09051 0.00206838637694 2239
4.99855 2.53839 6.93694 0.00296146126182 2240
4.79864 2.53257 6.73121 0.0046527657527 2241
4.59876 2.52562 6.52438 0.00713391808498 2242
4.44887 2.51981 6.36868 0.00969405250802 2243
4.24904 2.51166 6.1607 0.0143381354535 2244
4.09915 2.50579 6.00494 0.0189814840163 2245
3.89925 2.4995 5.79875 0.0270982349093 2246
3.74927 2.49714 5.64641 0.0348892299684 2247
3.5493 2.49957 5.44887 0.0478181779069 2248
3.39953 2.50773 5.30726 0.0596125172536 2249
3.20095 2.53105 5.132 0.0779720037521 2250
3.00575 2.57409 4.97984 0.0982950837602 2251
2.86411 2.62325 4.88736 0.1131580836 2252
2.72973 2.68967 4.8194 0.12528897484 2253
2.56837 2.80727 4.77564 0.136111225391 2254
2.46548 2.91623 4.78171 0.138099813585 2255
2.35626 3.08342 4.83968 0.132064395382 2256
2.27772 3.26715 4.94487 0.118317625407 2257
2.23576 3.41112 5.04688 0.104964110153 2258
2.19717 3.6073 5.20447 0.0865982819663 2259
2.17802 3.75606 5.33408 0.0735836797016 2260
2.16166 3.95537 5.51703 0.0579363095883 2261
2.15426 4.10519 5.65945 0.0477483953103 2262
2.14972 4.25512 5.80484 0.0389172455581 2263
2.14663 4.45509 6.00172 0.0291392650927 2264
2.14573 4.60509 6.15082 0.0231653843678 2265
2.14556 4.75509 6.30065 0.0182189499318 2266
2.14583 4.90509 6.45092 0.0141694342753 2267
2.14632 5.05509 6.60141 0.0108901722729 2268
2.14712 5.25508 6.8022 0.00751253341786 2269
5.4986 2.54839 7.14699 0.000865809314947 2270
5.34861 2.54622 6.99483 0.00132693553686 2271
5.19863 2.54362 6.84225 0.00195847841705 2272
4.99868 2.53943 6.63811 0.00316649832245 2273
4.84872 2.53575 6.48447 0.00444584968335 2274
4.6488 2.53028 6.27908 0.00683769167287 2275
4.49886 2.52597 6.12483 0.00930891993723 2276
4.29893 2.52054 5.91947 0.0137996381056 2277
4.09897 2.51663 5.7156 0.0201895764749 2278
3.89898 2.5161 5.51508 0.0285917648515 2279
3.74902 2.5195 5.36852 0.0366814743178 2280
3.54942 2.53185 5.18127 0.0501359932563 2281
3.35105 2.55697 5.00802 0.0666600708458 2282
3.15573 2.5996 4.85533 0.0856121551701 2283
2.9667 2.66452 4.73122 0.105066094314 2284
2.78887 2.75563 4.6445 0.121074005269 2285
2.62848 2.87471 4.60319 0.131082878645 2286
2.49174 3.02032 4.61206 0.133310623686 2287
2.40722 3.14413 4.65135 0.129485184225 2288
2.31895 3.3234 4.74235 0.117285838579 2289
2.25579 3.51304 4.86883 0.100238562201 2290
2.21279 3.7083 5.02109 0.0822300448112 2291
2.18481 3.9063 5.19111 0.065419815942 2292
2.16742 4.10553 5.37295 0.0508084099781 2293
2.15718 4.30526 5.56244 0.0387520469832 2294
2.15157 4.50518 5.75675 0.0286663778539 2295
2.14883 4.70516 5.95399 0.0209251586067 2296
2.14778 4.90515 6.15293 0.0149819466179 2297
2.14762 5.05515 6.30277 0.0115056818728 2298
2.14777 5.20515 6.45292 0.0087254476261 2299
2.14807 5.35515 6.60322 0.00652397439944 2300
5.64829 2.55032 6.99861 0.00058880254878 2301
5.4483 2.54804 6.79634 0.00110491173704 2302
5.24832 2.54521 6.59353 0.00189216225926 2303
5.09834 2.54272 6.44106 0.00273593769299 2304
4.89838 2.53904 6.23742 0.00433661103661 2305
4.7484 2.53615 6.08455 0.00601766163344 2306
4.54844 2.5326 5.88104 0.00913231632772 2307
4.39845 2.53069 5.72914 0.0123222898434 2308
4.24845 2.53007 5.57852 0.0164463063619 2309
4.04847 2.53267 5.38114 0.0238662940475 2310
3.89859 2.5386 5.23719 0.0309125943825 2311
3.69924 2.55438 5.05362 0.0428101356394 2312
3.55056 2.57413 4.92469 0.0537070729618 2313
3.40329 2.6025 4.80579 0.0661712035939 2314
3.25836 2.64105 4.69941 0.0798313689831 2315
3.07092 2.71051 4.58143 0.0986125800755 2316
2.89342 2.80238 4.4958 0.11533813061 2317
2.76925 2.88643 4.45568 0.123860745271 2318
2.65481 2.9833 4.43811 0.1295159948 2319
2.52048 3.13123 4.45171 0.130572140241 2320
2.43532 3.25463 4.48995 0.126498654306 2321
2.34369 3.43223 4.57592 0.113884137484 2322
2.27584 3.62025 4.69609 0.0968711208486 2323
2.22817 3.81442 4.84259 0.0789257140722 2324
2.1962 4.01181 5.00801 0.0622158068265 2325
2.17564 4.21073 5.18637 0.0477733764506 2326
2.16559 4.36039 5.32598 0.0386445410331 2327
2.15712 4.56021 5.51733 0.0287016166824 2328
2.15243 4.76015 5.71258 0.0206111768449 2329
2.15051 4.91014 5.86065 0.0159719796049 2330
2.14925 5.11013 6.05938 0.0111666759333 2331
2.14891 5.26013 6.20904 0.00841239560833 2332
2.14887 5.41013 6.359 0.00624538697725 2333
2.149 5.56013 6.50913 0.00455610991466 2334
5.79761 2.55176 6.84937 0.000381461507946 2335
5.59762 2.55004 6.64766 0.00080337819756 2336
5.39763 2.54795 6.44558 0.00145181527087 2337
5.24764 2.54617 6.29381 0.00215157407469 2338
5.09765 2.54429 6.14194 0.00310336347741 2339
4.89767 2.54189 5.93956 0.00490894661397 2340
4.69768 2.54016 5.73784 0.00756768236298 2341
4.54768 2.53989 5.58757 0.0103225972191 2342
4.39768 2.54116 5.43884 0.0139212160193 2343
4.19777 2.54672 5.24449 0.0206556752766 2344
4.04801 2.55518 5.10319 0.0269066530461 2345
3.89863 2.56874 4.96737 0.0346520493846 2346
3.70071 2.59726 4.79797 0.0474290052405 2347
3.50556 2.64078 4.64634 0.06292622542 2348
3.31522 2.70194 4.51716 0.0803594113119 2349
3.17704 2.76022 4.43726 0.0938672763459 2350
3.04391 2.82926 4.37317 0.106731670626 2351
2.52111 3.28713 4.30824 0.129173727748 2352
2.4385 3.41227 4.35077 0.122903803063 2353
2.34849 3.59072 4.43921 0.108551206114 2354
2.29582 3.73113 4.52695 0.095429570082 2355
2.24323 3.92401 4.66724 0.0772867994351 2356
2.20714 4.12069 4.82783 0.0603941568473 2357
2.1834 4.31925 5.00265 0.0458800247669 2358
2.16842 4.51868 5.1871 0.0340486116949 2359
2.15937 4.71847 5.37784 0.024834216424 2360
2.15419 4.9184 5.57259 0.0179073018807 2361
2.15143 5.11838 5.76981 0.0121228201985 2362
2.15036 5.26838 5.91874 0.00909606537535 2363
2.14981 5.41838 6.06819 0.00672662835366 2364
2.14959 5.56838 6.21797 0.0048886003525 2365
2.14957 5.71838 6.36795 0.0034753179433 2366
5.94667 2.55282 6.69949 0.000230359477074 2367
5.79667 2.55186 6.54853 0.000486473237382 2368
5.64667 2.55076 6.39743 0.000843899878112 2369
5.44668 2.54915 6.19583 0.00154277249677 2370
5.29668 2.54792 6.0446 0.00230013358774 2371
5.09669 2.54652 5.84321 0.0037547855046 2372
4.94669 2.54595 5.69264 0.00530206694838 2373
4.79669 2.54621 5.5429 0.00737424493822 2374
4.59671 2.54879 5.3455 0.011212942274 2375
4.44678 2.55337 5.20015 0.0151243337633 2376
4.29699 2.5613 5.05829 0.0201282235182 2377
4.09782 2.5792 4.87702 0.0291583258736 2378
3.94926 2.59989 4.74915 0.0372453669923 2379
3.802 2.62834 4.63034 0.0467609230131 2380
3.65675 2.6657 4.52245 0.0576618939235 2381
3.46764 2.73058 4.39822 0.0738511917415 2382
3.28537 2.81275 4.29812 0.090887734297 2383
2.46794 3.5296 4.19754 0.124277591674 2384
2.37275 3.70535 4.2781 0.109787150031 2385
2.29957 3.89137 4.39094 0.0918436967942 2386
2.2465 4.08413 4.53063 0.0734020556689 2387
2.20986 4.2807 4.69056 0.0565489317411 2388
2.19073 4.42947 4.8202 0.0455986949493 2389
2.1734 4.6287 5.0021 0.0334577424113 2390
2.16489 4.77846 5.14335 0.0261976166057 2391
2.15766 4.97832 5.33598 0.0186666681106 2392
2.15436 5.12829 5.48265 0.0143985231205 2393
2.1518 5.32827 5.68007 0.00927534472156 2394
2.15078 5.47827 5.82905 0.00678446876189 2395
2.15013 5.67826 6.02839 0.00433919119584 2396
2.14996 5.82826 6.17822 0.00301047476061 2397
6.09556 2.55354 6.5491 0.000131011025013 2398
5.94556 2.55279 6.39835 0.000368294015289 2399
5.79556 2.55196 6.24752 0.000703110592525 2400
5.64556 2.5511 6.09666 0.00117131911043 2401
5.44557 2.55004 5.89561 0.00208830640326 2402
5.29557 2.54951 5.74508 0.00308183965974 2403
5.14557 2.54948 5.59505 0.00443440822148 2404
4.99557 2.55029 5.44586 0.00625711056165 2405
4.7956 2.55363 5.24923 0.00965201179308 2406
4.59575 2.56115 5.0569 0.0144896935239 2407
4.44607 2.57095 4.91702 0.0193009259791 2408
4.2472 2.59196 4.73916 0.0275581449471 2409
4.05 2.62508 4.57508 0.0385075440865 2410
3.85597 2.67336 4.42933 0.0513019263979 2411
3.66698 2.7386 4.30558 0.0659006654389 2412
2.39777 3.82103 4.1188 0.114069538301 2413
2.33634 3.95783 4.19417 0.100587854106 2414
2.27297 4.14743 4.3204 0.0814517956826 2415
2.2281 4.34227 4.47037 0.0632591213575 2416
2.2042 4.49034 4.59454 0.0511578146908 2417
2.18678 4.63932 4.7261 0.0406406880068 2418
2.17111 4.8387 4.90981 0.0293091874218 2419
2.1615 5.03846 5.09996 0.0201585818408 2420
2.15586 5.23838 5.29424 0.0137111438067 2421
2.15333 5.38836 5.44169 0.010092698722 2422
2.15141 5.58835 5.63976 0.00653075228526 2423
2.15067 5.73835 5.78902 0.00459496724315 2424
2.15028 5.88835 5.93863 0.00313937513597 2425
2.15013 6.03835 6.08848 0.00205504928332 2426
6.2444 2.55398 6.39838 8.79556310955e-05 2427
6.0944 2.55336 6.24776 0.000331642198125 2428
5.9444 2.5527 6.0971 0.000678834993109 2429
5.7944 2.55206 5.94646 0.00116772781918 2430
5.6444 2.55152 5.79592 0.00184925883789 2431
5.4944 2.55125 5.64565 0.00278972763804 2432
5.3444 2.55148 5.49588 0.0040734835991 2433
5.14441 2.55318 5.29759 0.00650178389627 2434
4.99444 2.55618 5.15062 0.00902396843495 2435
4.79459 2.5639 4.95849 0.0135909019524 2436
4.59511 2.5781 4.77321 0.0200913958317 2437
4.39655 2.60184 4.59839 0.0282493564422 2438
4.2 2.63859 4.43859 0.0384891399766 2439
4.05491 2.67656 4.33147 0.0474219656763 2440
3.91276 2.72437 4.23713 0.0573336632831 2441
2.40072 3.98102 3.98174 0.117495067827 2442
2.32051 4.16411 4.08462 0.0984086280886 2443
2.26131 4.35506 4.21637 0.0785856374919 2444
2.21995 4.55069 4.37064 0.0602668323368 2445
2.19232 4.74874 4.54106 0.0446157221205 2446
2.17456 4.94794 4.7225 0.0321533590702 2447
2.16359 5.14763 4.91122 0.0226748376866 2448
2.15839 5.29754 5.05593 0.0172773363639 2449
2.15412 5.49749 5.25161 0.0107806385097 2450
2.15227 5.64748 5.39975 0.00771263306698 2451
2.15116 5.79748 5.54864 0.00539063785265 2452
2.15042 5.99747 5.74789 0.0031816883605 2453
2.1502 6.14747 5.89767 0.00202335476996 2454
6.39326 2.55416 6.24742 0.000114696190308 2455
6.24326 2.5536 6.09686 0.000393912595093 2456
6.09326 2.55303 5.94629 0.000793002159632 2457
5.94326 2.5525 5.79576 0.00135555590387 2458
5.79326 2.55211 5.64537 0.00213859596859 2459
5.64326 2.55205 5.49531 0.00321469633719 2460
5.49326 2.55255 5.34581 0.00467398090566 2461
5.29327 2.55478 5.14805 0.0074034196197 2462
5.09335 2.56004 4.95339 0.0112979429135 2463
4.94352 2.56713 4.81065 0.0151677502684 2464
4.79393 2.57815 4.67208 0.0199786420425 2465
4.64482 2.59446 4.53928 0.0258486848269 2466
4.44754 2.62708 4.37462 0.0351883091879 2467
4.30161 2.66169 4.2633 0.0433325423377 2468
4.11147 2.72346 4.13493 0.0554091692628 2469
2.32218 4.32212 3.9443 0.104512423416 2470
2.27512 4.46451 4.03963 0.0888934064688 2471
2.22896 4.65904 4.188 0.0690643683036 2472
2.20449 4.80702 4.31151 0.0558040442135 2473
2.18675 4.95596 4.44271 0.0441968458851 2474
2.17089 5.15531 4.6262 0.0316908449751 2475
2.16123 5.35508 4.81631 0.0222453841981 2476
2.15562 5.555 5.01062 0.0154068763047 2477
2.15253 5.75497 5.2075 0.00903221866519 2478
2.15096 5.95496 5.40592 0.00554015332727 2479
2.15038 6.10496 5.55534 0.0036882378094 2480
2.15011 6.25496 5.70507 0.00232942031566 2481
6.54215 2.5541 6.09625 0.000234988727729 2482
6.39215 2.55354 5.94569 0.000585257948928 2483
6.19216 2.55278 5.74494 0.00129126428651 2484
6.04216 2.55231 5.59447 0.00207042932598 2485
5.89216 2.55205 5.44421 0.0031417455855 2486
5.74216 2.55222 5.29438 0.00459290490322 2487
5.59216 2.55312 5.14528 0.00652760186842 2488
5.44217 2.55521 4.99738 0.00906181843215 2489
5.24226 2.56095 4.80321 0.0135828344441 2490
5.04258 2.57207 4.61465 0.0196471042092 2491
4.84355 2.59153 4.43508 0.0273761073059 2492
4.64609 2.62304 4.26913 0.0368026749904 2493
4.5 2.65697 4.15697 0.0448180225036 2494
4.30976 2.71843 4.02819 0.0563835115438 2495
2.29075 4.57283 3.86358 0.103414436576 2496
2.23896 4.76592 4.00488 0.0819915641847 2497
2.21134 4.91334 4.12468 0.0671040788737 2498
2.19127 5.06198 4.25325 0.0539384605246 2499
2.17701 5.2113 4.38831 0.0426493040643 2500
2.16458 5.4109 4.57548 0.0305262862913 2501
2.15873 5.56079 4.71952 0.0234651068117 2502
2.15399 5.76073 4.91472 0.0144963823128 2503
2.15149 5.96071 5.1122 0.00921957002394 2504
2.15051 6.11071 5.26122 0.00636349182706 2505
2.15001 6.26071 5.41072 0.00423664032821 2506
2.14982 6.41071 5.56053 0.00267599784241 2507
6.69103 2.55379 5.94482 0.000484795542055 2508
6.54103 2.55317 5.7942 0.0009514850256 2509
6.39103 2.55252 5.64355 0.00160875654103 2510
6.24103 2.55193 5.49296 0.00252006666385 2511
6.09103 2.55151 5.34254 0.00376443766278 2512
5.94103 2.55144 5.19247 0.00543679799676 2513
5.79103 2.55202 5.04305 0.00764615052876 2514
5.59105 2.55455 4.8456 0.0116321991062 2515
5.39115 2.56053 4.65168 0.0170523618004 2516
5.24137 2.56863 4.51 0.0221536629636 2517
5.04221 2.58673 4.32894 0.030473582709 2518
4.89372 2.6079 4.20162 0.0377702571107 2519
4.6982 2.64969 4.04789 0.0485989907381 2520
4.50773 2.71039 3.91812 0.0600890741244 2521
4.36986 2.7694 3.83926 0.0686952511686 2522
2.23921 4.92074 3.85995 0.0941030382958 2523
2.21079 5.06801 3.9788 0.0782006414143 2524
2.18484 5.26629 4.15113 0.0594110809626 2525
2.17205 5.41574 4.28779 0.0474548982901 2526
2.16113 5.61543 4.47656 0.0319129724832 2527
2.15613 5.76535 4.62148 0.0240144807939 2528
2.15224 5.96531 4.81755 0.0159388648316 2529
2.15032 6.1653 5.01562 0.0101717954854 2530
2.14965 6.3153 5.16495 0.0070381667318 2531
2.14938 6.4653 5.31468 0.00469880924981 2532
2.14935 6.6153 5.46465 0.00297958112889 2533
6.83972 2.55323 5.79295 0.000916957864879 2534
6.68972 2.55248 5.6422 0.00155997705648 2535
6.53972 2.55169 5.49141 0.00245316778797 2536
6.38972 2.55094 5.34066 0.00367490495342 2537
6.18973 2.5502 5.13993 0.00598081207986 2538
6.03973 2.55014 4.98987 0.0083627048629 2539
5.88973 2.55087 4.8406 0.011439355009 2540
5.73974 2.55291 4.69265 0.015331605917 2541
5.53984 2.55898 4.49882 0.0219161577859 2542
5.39008 2.56742 4.3575 0.028015307479 2543
5.24068 2.58075 4.22143 0.0350967439427 2544
5.04275 2.60919 4.05194 0.0458537973669 2545
4.84792 2.65403 3.90195 0.057556453369 2546
4.70545 2.70084 3.80629 0.066417047606 2547
2.21048 5.2229 3.83338 0.091548065197 2548
2.1892 5.37137 3.96057 0.0753083709419 2549
2.17054 5.57048 4.14102 0.0564060214946 2550
2.16174 5.72022 4.28196 0.0445477269156 2551
2.15603 5.87011 4.42614 0.0346704538361 2552
2.15164 6.07006 4.6217 0.0225194646933 2553
2.14992 6.22005 4.76997 0.0165194739184 2554
2.14887 6.42004 4.96891 0.0105570122976 2555
2.14865 6.57004 5.11869 0.00731293481651 2556
2.14869 6.72004 5.26873 0.00488918436302 2557
6.98792 2.5524 5.64032 0.00160781133256 2558
6.78793 2.55112 5.43905 0.0028766307447 2559
6.63793 2.55011 5.28804 0.00423852447287 2560
6.48793 2.54913 5.13706 0.00606421957215 2561
6.28794 2.54817 4.93611 0.00942411743653 2562
6.13794 2.54806 4.786 0.0128049332166 2563
5.98794 2.54895 4.63689 0.017064097093 2564
5.83796 2.55148 4.48944 0.0223079009843 2565
5.63811 2.55904 4.29715 0.0308674760799 2566
5.48848 2.56951 4.15799 0.0385017784846 2567
5.28992 2.59314 3.98306 0.0500742062044 2568
5.09385 2.63227 3.82612 0.062635418081 2569
4.90294 2.69153 3.69447 0.0751401596806 2570
2.19497 5.47878 3.77375 0.0948152587954 2571
2.17285 5.67753 3.95038 0.0726485958206 2572
2.15991 5.8771 4.13701 0.0537587267194 2573
2.1542 6.02699 4.28119 0.0419950370433 2574
2.15076 6.17695 4.42771 0.0321913495925 2575
2.14844 6.37693 4.62537 0.0220442960245 2576
2.14777 6.52693 4.7747 0.0158836972518 2577
2.14761 6.67693 4.92454 0.0113710814764 2578
2.14776 6.82693 5.07469 0.00793430993953 2579
2.14807 6.97693 5.225 0.00535911395248 2580
7.13515 2.55125 5.4864 0.00267089371464 2581
6.93516 2.54962 5.28478 0.0044523334342 2582
6.78516 2.5483 5.13346 0.00633039447016 2583
6.58517 2.54659 4.93176 0.00978913586698 2584
6.43517 2.54558 4.78075 0.0132749782993 2585
6.28517 2.54516 4.63033 0.0176751084199 2586
6.08518 2.54641 4.43159 0.0251597354829 2587
5.88525 2.55151 4.23676 0.0346230164999 2588
5.73547 2.55954 4.09501 0.042984789769 2589
5.53645 2.57907 3.91552 0.0554963813103 2590
5.33946 2.61326 3.75272 0.0689026390557 2591
5.1945 2.65167 3.64617 0.0790956739668 2592
5.00776 2.72292 3.53068 0.0916569506883 2593
7.2719 2.54964 5.32154 0.00437771363093 2603
7.1219 2.54812 5.17002 0.00620047581731 2604
6.92192 2.54587 4.96779 0.00957380165918 2605
6.72193 2.54364 4.76557 0.0143332792267 2606
6.52194 2.54197 4.56391 0.0208446529596 2607
6.37194 2.54167 4.41361 0.0269766447642 2608
6.22194 2.54295 4.26489 0.0343012973528 2609
6.02204 2.54889 4.07093 0.0458175079729 2610
5.87235 2.55842 3.93077 0.0555743090904 2611
5.72322 2.57446 3.79768 0.066028968996 2612
5.52648 2.60999 3.63647 0.0808764824591 2613
5.38202 2.65023 3.53225 0.0905597561767 2614
7.4023 2.54752 5.14982 0.00710539227268 2615
7.25231 2.54558 4.99789 0.0097743028449 2616
7.10232 2.54348 4.8458 0.0132415470966 2617
6.90234 2.54065 4.64299 0.0193535588846 2618
6.75235 2.53883 4.49118 0.0253110200434 2619
6.55236 2.53768 4.29004 0.03520767924 2620
6.40236 2.53872 4.14108 0.0440581569639 2621
6.20247 2.54483 3.9473 0.0573616107349 2622
6.05283 2.55509 3.80792 0.0679478808793 2623
5.90387 2.57263 3.6765 0.078508420658 2624
5.0458 2.61015 7.65595 0.0023884905339 2625
4.89588 2.60523 7.50111 0.00339366901927 2626
4.74599 2.59936 7.34535 0.00474367500625 2627
4.54622 2.58992 7.13614 0.00725698372765 2628
4.34654 2.57867 6.92521 0.0108644649055 2629
4.19683 2.56922 6.76605 0.0145110289429 2630
3.99728 2.55588 6.55316 0.0209798657254 2631
3.8476 2.54603 6.39363 0.0273084819036 2632
3.64792 2.53485 6.18277 0.0381416324856 2633
3.49801 2.52965 6.02766 0.0483555085614 2634
3.29804 2.5307 5.82874 0.065119292495 2635
3.14843 2.54115 5.68958 0.0801918709095 2636
3.00028 2.56428 5.56456 0.0972879174032 2637
2.85613 2.60534 5.46147 0.11577710969 2638
2.67938 2.69771 5.37709 0.129499834232 2639
2.53737 2.83747 5.37484 0.137881557224 2640
2.44088 3.01207 5.45295 0.134096321052 2641
2.38333 3.20337 5.5867 0.121650398346 2642
2.35807 3.35119 5.70926 0.0984213942873 2643
2.34312 3.50043 5.84355 0.0849890973644 2644
2.33372 3.70019 6.03391 0.0686321885994 2645
2.33162 3.90017 6.23179 0.0543647452346 2646
2.33344 4.10016 6.4336 0.0422565081026 2647
2.33606 4.25014 6.5862 0.0345476041862 2648
2.33912 4.40011 6.73923 0.0279441719059 2649
2.34328 4.60006 6.94334 0.0207149927631 2650
2.34708 4.80003 7.14711 0.015082637805 2651
2.34957 4.95001 7.29958 0.0114603438246 2652
5.19826 2.61449 7.51275 0.00170584490097 2653
5.04831 2.6106 7.35891 0.00246847652505 2654
4.89838 2.60593 7.20431 0.00350158872235 2655
4.74848 2.60041 7.04889 0.00488880736592 2656
4.54867 2.59172 6.84039 0.00747199962899 2657
4.34893 2.58166 6.63059 0.0111819375835 2658
4.14922 2.57079 6.42001 0.0164062162899 2659
3.9495 2.56022 6.20972 0.0236004272632 2660
3.74968 2.55186 6.00154 0.0332542436794 2661
3.59971 2.54879 5.8485 0.0423775797195 2662
3.39977 2.55239 5.65216 0.0571905039884 2663
3.20064 2.57033 5.47097 0.0749745151808 2664
3.00497 2.61097 5.31594 0.094652731993 2665
2.81948 2.68484 5.20432 0.113121877676 2666
2.65694 2.80042 5.15736 0.124851605736 2667
2.5588 2.91356 5.17236 0.127566936728 2668
2.46381 3.08911 5.25292 0.118917311992 2669
2.41618 3.23126 5.34744 0.110860777886 2670
2.37598 3.42707 5.50305 0.0938783382995 2671
2.35822 3.576 5.63422 0.0810226383358 2672
2.34539 3.77556 5.82095 0.0651390438695 2673
2.34115 3.9255 5.96665 0.054530767472 2674
2.33982 4.12549 6.16531 0.0422763761848 2675
2.34075 4.27549 6.31624 0.0344812531142 2676
2.34254 4.42548 6.46802 0.0278133838431 2677
2.34549 4.62546 6.67095 0.0205197962726 2678
2.34851 4.82544 6.87395 0.0148253677894 2679
2.35124 5.02542 7.07666 0.0104723540645 2680
2.35302 5.17541 7.22843 0.00793798893109 2681
5.34885 2.6179 7.36675 0.00121010317173 2682
5.19888 2.61485 7.21373 0.00179471476292 2683
4.99894 2.60981 7.00875 0.00291591535448 2684
4.79904 2.60357 6.80261 0.00458644032903 2685
4.59918 2.59618 6.59536 0.00703656319353 2686
4.4493 2.59003 6.43933 0.00956386296881 2687
4.24948 2.58155 6.23103 0.014146241863 2688
4.04963 2.57382 6.02345 0.0205070060301 2689
3.89969 2.56961 5.8693 0.0267217079931 2690
3.69971 2.56832 5.66803 0.037264758876 2691
3.54978 2.57269 5.52247 0.0470427313928 2692
3.40022 2.58398 5.3842 0.0585214813823 2693
3.25171 2.60488 5.25659 0.0715288798109 2694
3.05783 2.65335 5.11118 0.09024393967 2695
2.87467 2.73297 5.00764 0.107512133443 2696
2.71261 2.84944 4.96205 0.118156304971 2697
2.61161 2.96011 4.97172 0.121254573181 2698
2.50858 3.13112 5.0397 0.115771372348 2699
2.4388 3.31834 5.15714 0.104872882523 2700
2.3948 3.51334 5.30814 0.0888121957345 2701
2.36887 3.71161 5.48048 0.072517719221 2702
2.35491 3.9111 5.66601 0.0577575898392 2703
2.34849 4.11099 5.85948 0.0448372273525 2704
2.34674 4.26098 6.00772 0.0366074572386 2705
2.34661 4.41098 6.15759 0.02955484073 2706
2.34743 4.56098 6.30841 0.0235966117178 2707
2.34928 4.76097 6.51025 0.017170718907 2708
2.35139 4.96096 6.71235 0.0122318576359 2709
2.3534 5.16095 6.91435 0.00851261517235 2710
5.49915 2.62058 7.21973 0.000838389605066 2711
5.29918 2.61731 7.01649 0.00147630452444 2712
5.14921 2.6143 6.86351 0.00216374132226 2713
4.99925 2.61078 6.71003 0.00309683132242 2714
4.8493 2.60677 6.55607 0.00435323917232 2715
4.64939 2.60081 6.3502 0.00670229128442 2716
4.44949 2.59458 6.14407 0.0100928298141 2717
4.29955 2.59025 5.9898 0.0135364572287 2718
4.0996 2.58611 5.78571 0.0197653229592 2719
3.9496 2.58539 5.63499 0.0257068548598 2720
3.74967 2.59001 5.43968 0.0359029922949 2721
3.6 2.59984 5.29984 0.0454269680109 2722
3.45105 2.61741 5.16846 0.0565894430699 2723
3.25514 2.65718 5.01232 0.0735960878899 2724
3.06591 2.72142 4.88733 0.0914641190092 2725
2.88976 2.81558 4.80534 0.106607215077 2726
2.77123 2.90731 4.77854 0.113287624983 2727
2.63758 3.05566 4.79324 0.116427778229 2728
2.53524 3.22718 4.86242 0.110773200687 2729
2.47824 3.36585 4.94409 0.103098399943 2730
2.42444 3.55836 5.0828 0.0881295169879 2731
2.39729 3.70586 5.20315 0.0761181712057 2732
2.37864 3.85469 5.33333 0.0645280543064 2733
2.36337 4.05409 5.51746 0.050646686487 2734
2.3555 4.25392 5.70942 0.0387808655015 2735
2.35271 4.4039 5.85661 0.0313078978767 2736
2.35151 4.60389 6.0554 0.023123171736 2737
2.35173 4.75389 6.20562 0.0181800494294 2738
2.35246 4.90389 6.35635 0.0141269243427 2739
2.35344 5.05389 6.50733 0.0108420147962 2740
2.35485 5.25388 6.70873 0.0074561962152 2741
2.35585 5.40388 6.85973 0.00552615032106 2742
5.64918 2.62265 7.07183 0.00055807765839 2743
5.49919 2.62082 6.92001 0.000913475483022 2744
5.3492 2.61864 6.76784 0.00140284521043 2745
5.14923 2.61517 6.5644 0.00234506511505 2746
4.94928 2.61113 6.36041 0.00375695101418 2747
4.79931 2.60787 6.20718 0.00524462996704 2748
4.59936 2.60362 6.00298 0.00801058356725 2749
4.44938 2.60099 5.85037 0.0108530917937 2750
4.24939 2.59935 5.64874 0.0161531651052 2751
4.09939 2.60064 5.50003 0.0211853823441 2752
3.89954 2.60792 5.30746 0.0299780506118 2753
3.75 2.61954 5.16954 0.0383487343244 2754
3.60121 2.63845 5.03966 0.0483088490245 2755
3.45392 2.66669 4.92061 0.059746051574 2756
3.26195 2.72241 4.78436 0.0765861332838 2757
3.0789 2.80258 4.68148 0.0933423581894 2758
2.50391 3.46781 4.77172 0.0990772721408 2759
2.44544 3.65896 4.9044 0.0842020329686 2760
2.40651 3.85508 5.06159 0.0684650406918 2761
2.38204 4.05355 5.23559 0.053860776995 2762
2.37048 4.2031 5.37358 0.0442199457905 2763
2.3613 4.40288 5.56418 0.0333426647247 2764
2.3568 4.60282 5.75962 0.0245807072037 2765
2.35533 4.75282 5.90815 0.0192957240827 2766
2.35487 4.90282 6.05769 0.0149715866296 2767
2.35502 5.05282 6.20784 0.0114746326028 2768
2.35551 5.20282 6.35833 0.00867727830585 2769
2.35639 5.40281 6.5592 0.0058354857544 2770
2.35708 5.55281 6.70989 0.00423836178355 2771
5.79896 2.62422 6.92318 0.000347102609547 2772
5.64896 2.62281 6.77177 0.000633429037923 2773
5.44898 2.62054 6.56952 0.00119301433814 2774
5.29899 2.61857 6.41756 0.00179879527984 2775
5.149 2.61642 6.26542 0.00262487610254 2776
4.94903 2.61346 6.06249 0.00419664204661 2777
4.79904 2.61147 5.91051 0.00585295208928 2778
4.59905 2.60978 5.70883 0.00893467493249 2779
4.44905 2.60997 5.55902 0.0121020971878 2780
4.24909 2.61369 5.36278 0.018031892701 2781
4.04936 2.62379 5.17315 0.0257658821437 2782
3.9 2.63758 5.03758 0.0332002996323 2783
3.70228 2.6674 4.86968 0.0454862255686 2784
3.50787 2.71403 4.7219 0.0602006295691 2785
3.36585 2.76219 4.62804 0.0723089146433 2786
3.22866 2.82273 4.55139 0.0845652940203 2787
2.48047 3.7164 4.69687 0.0856045527861 2788
2.43197 3.91035 4.84232 0.0697622633904 2789
2.40659 4.05817 4.96476 0.0583616428847 2790
2.38853 4.20707 5.0956 0.0479728057197 2791
2.37609 4.35655 5.23264 0.0388560125155 2792
2.36784 4.50632 5.37416 0.03106875606 2793
2.36261 4.65623 5.51884 0.0245094488476 2794
2.35881 4.85619 5.715 0.0175398708697 2795
2.35726 5.05618 5.91344 0.0122851872965 2796
2.35696 5.20618 6.06314 0.00926183939367 2797
2.35707 5.35618 6.21325 0.006877781293 2798
2.35741 5.50618 6.36359 0.00501596542181 2799
2.35785 5.65618 6.51403 0.003575733127 2800
5.94855 2.62537 6.77392 0.000191073823244 2801
5.79855 2.62428 6.62283 0.000431809766694 2802
5.59856 2.62257 6.42113 0.000907153674904 2803
5.39857 2.62062 6.21919 0.00163982020594 2804
5.19858 2.61864 6.01722 0.0027560572403 2805
4.99859 2.61703 5.81562 0.00443623743478 2806
4.84859 2.6165 5.66509 0.0062133136932 2807
4.69859 2.61708 5.51567 0.00857969767314 2808
4.49863 2.62075 5.31938 0.0129278823415 2809
4.29884 2.62984 5.12868 0.0193916984989 2810
4.09963 2.64731 4.94694 0.0275476103792 2811
3.95108 2.66806 4.81914 0.0352690872468 2812
3.75536 2.70892 4.66428 0.0476735253699 2813
3.61148 2.75123 4.56271 0.0583988556302 2814
3.42558 2.82474 4.45032 0.0737702288857 2815
2.46075 3.96947 4.63022 0.072945177315 2816
2.42872 4.11599 4.74471 0.0610831217121 2817
2.4052 4.26412 4.86932 0.050122166334 2818
2.38406 4.46298 5.04704 0.0375194314378 2819
2.3713 4.66256 5.23386 0.0273940207325 2820
2.36549 4.81245 5.37794 0.0212411338312 2821
2.36104 5.0124 5.57344 0.0148699377626 2822
2.35933 5.16239 5.72172 0.0112079902554 2823
2.35834 5.36238 5.92072 0.00751373175873 2824
2.35818 5.51238 6.07056 0.00545279779391 2825
2.3583 5.66238 6.22068 0.0038674774803 2826
2.35856 5.81238 6.37094 0.00265950703098 2827
6.09803 2.62618 6.62421 8.33098951925e-05 2828
5.94803 2.62532 6.47335 0.00030041907702 2829
5.59804 2.62295 6.12099 0.00121500012463 2831
5.39805 2.62161 5.91966 0.00215376904961 2832
5.24805 2.62089 5.76894 0.0031697037913 2833
5.09805 2.62068 5.61873 0.00455169383174 2834
4.94805 2.62141 5.46946 0.00641236226416 2835
4.74808 2.62485 5.27293 0.00987451736716 2836
4.54825 2.63293 5.08118 0.0147995760487 2837
4.34886 2.64832 4.89718 0.0219928818569 2838
4.1506 2.67438 4.72498 0.0308408172448 2839
4.0034 2.70313 4.60653 0.0389582374025 2840
3.81066 2.75626 4.46692 0.0515364115394 2841
3.66999 2.80825 4.37824 0.0620544679269 2842
2.45395 4.176 4.52995 0.0662808491212 2843
2.4242 4.323 4.6472 0.0545227350522 2844
2.39667 4.52107 4.81774 0.0407716546527 2845
2.3794 4.72031 4.99971 0.029633646865 2846
2.36914 4.92004 5.18918 0.0210110923014 2847
2.36452 5.06997 5.33449 0.0157802555267 2848
2.36103 5.26993 5.53096 0.0106503422554 2849
2.3597 5.41993 5.67963 0.00778162983948 2850
2.35906 5.56993 5.82899 0.00557559070988 2851
2.35885 5.71993 5.97878 0.0038956720719 2852
2.35889 5.86993 6.12882 0.00262860868811 2853
2.35907 6.01993 6.279 0.0016824003422 2854
6.24747 2.62669 6.47416 2.54488340786e-05 2855
6.09747 2.62597 6.32344 0.000241628517284 2856
5.94747 2.62519 6.17266 0.000550700714861 2857
5.74748 2.62413 5.97161 0.00116865719055 2858
5.59748 2.62344 5.82092 0.00184971407053 2859
5.44748 2.62302 5.6705 0.00278979471815 2860
5.29748 2.62313 5.52061 0.00407364036428 2861
5.14748 2.62415 5.37163 0.0058060568413 2862
4.9975 2.62663 5.22413 0.00811103965248 2863
4.79763 2.63354 5.03117 0.0123168118582 2864
4.59808 2.64682 4.8449 0.0184322564644 2865
4.39941 2.66965 4.66906 0.0260845339254 2866
4.20273 2.70568 4.50841 0.0357685062158 2867
4.00985 2.7583 4.36815 0.0472938560914 2868
2.43606 4.43167 4.46773 0.0579563526474 2869
2.4112 4.57958 4.59078 0.0466993562741 2870
2.38863 4.77828 4.76691 0.0340252226023 2871
2.3776 4.92787 4.90547 0.0263052306367 2872
2.37018 5.07769 5.04787 0.020084847421 2873
2.36418 5.27759 5.24177 0.0133317869263 2874
2.36165 5.42757 5.38922 0.00972013900312 2875
2.3602 5.57757 5.53777 0.00694680355598 2876
2.35932 5.77756 5.73688 0.00426590015362 2877
2.35913 5.92756 5.88669 0.002836288447 2878
2.35917 6.07756 6.03673 0.00177938288537 2879
2.35932 6.22756 6.18688 0.00100668438246 2880
6.39692 2.62693 6.32385 2.71782329219e-05 2881
6.24692 2.62629 6.17321 0.0002679738723 2882
6.09692 2.62561 6.02253 0.00061418312028 2883
5.94692 2.62494 5.87186 0.00110476817914 2884
5.79692 2.62437 5.72129 0.0017912402497 2885
5.64692 2.62407 5.57099 0.00274002711641 2886
5.49692 2.62427 5.42119 0.00403471028395 2887
5.29693 2.62598 5.22291 0.006476278127 2888
5.14696 2.62904 5.076 0.00899905863799 2889
4.99706 2.63451 4.93157 0.0122577291976 2890
4.79749 2.64736 4.74485 0.0179604585086 2891
4.59875 2.66954 4.56829 0.0254829946146 2892
4.45086 2.69456 4.44542 0.0322140317316 2893
4.25666 2.74209 4.29875 0.0426743221279 2894
2.42839 4.63786 4.36625 0.0561760817165 2895
2.39944 4.83572 4.53516 0.0414588611819 2896
2.38126 5.03487 4.71613 0.0295818810502 2897
2.37259 5.18462 4.85721 0.0225723005923 2898
2.36549 5.38449 5.04998 0.0148475668511 2899
2.36243 5.53446 5.19689 0.0107549416148 2900
2.36063 5.68445 5.34508 0.00761937416157 2901
2.35948 5.88444 5.54392 0.00460418272046 2902
2.35917 6.03444 5.69361 0.00300979447497 2903
2.35914 6.18444 5.84358 0.00184199827666 2904
2.35926 6.33444 5.9937 0.000997463453533 2905
6.54639 2.62691 6.1733 0.000107327644361 2906
6.39639 2.62629 6.02268 0.000403490074 2907
6.24639 2.62562 5.87201 0.000828271307527 2908
6.09639 2.62499 5.72138 0.00142780848047 2909
5.94639 2.62448 5.57087 0.0022619652856 2910
5.79639 2.62426 5.42065 0.00340602026956 2911
5.64639 2.6246 5.27099 0.0049515029402 2912
5.4464 2.62661 5.07301 0.00782321197275 2913
5.29644 2.63005 4.92649 0.0107387838775 2914
5.09664 2.63882 4.73546 0.0159064256024 2915
4.89731 2.65495 4.55226 0.0225938312964 2916
4.74854 2.67403 4.42257 0.0287218846612 2917
4.55224 2.71204 4.26428 0.038275648174 2918
4.36026 2.76783 4.12809 0.0490431854357 2919
2.42908 4.7938 4.22288 0.0611293960237 2920
2.40562 4.94194 4.34756 0.0490159342365 2921
2.38901 5.09101 4.48002 0.0385496062665 2922
2.37757 5.24057 4.61814 0.0297294756936 2923
2.36804 5.44033 4.80837 0.0205927030058 2924
2.36382 5.59027 4.95409 0.0154191675669 2925
2.36128 5.74025 5.10153 0.0104272922843 2926
2.35955 5.94024 5.29979 0.00641176045022 2927
2.35902 6.09024 5.44926 0.00427253461351 2928
2.35888 6.24024 5.59912 0.00269930760456 2929
2.35896 6.39024 5.7492 0.0015593787648 2930
2.35915 6.54024 5.89939 0.000745732918812 2931
6.69585 2.62665 6.0225 0.000295160353668 2932
6.49586 2.62573 5.82159 0.000849868004006 2933
6.34586 2.62501 5.67087 0.00147130943099 2934
6.19586 2.62435 5.52021 0.00233559461336 2935
6.04586 2.62386 5.36972 0.00351935567938 2936
5.89586 2.62377 5.21963 0.00511473432438 2937
5.74586 2.62438 5.07024 0.0072284669707 2938
5.59587 2.62617 4.92204 0.00997651191724 2939
5.39595 2.63156 4.72751 0.0148395034655 2940
5.24614 2.63912 4.58526 0.01945084941 2941
5.04691 2.65635 4.40326 0.0270636726201 2942
4.89832 2.67679 4.27511 0.0338206074988 2943
4.70258 2.71756 4.12014 0.0439659599459 2944
4.5118 2.7773 3.9891 0.0548619123213 2945
2.40517 5.09702 4.20219 0.0559709209075 2946
2.38814 5.24605 4.33419 0.0443524930891 2947
2.37359 5.4455 4.51909 0.0317232816081 2948
2.36534 5.64533 4.71067 0.0221300824834 2949
2.36185 5.79529 4.85714 0.0166828326915 2950
2.3594 5.99527 5.05467 0.00973767804448 2951
2.35861 6.14527 5.20388 0.00669687170736 2952
2.35835 6.29527 5.35362 0.00442992703993 2953
2.3584 6.44527 5.50367 0.00276665711953 2954
2.35861 6.59527 5.65388 0.00156557530182 2955
6.84524 2.62614 5.87138 0.000633996529113 2956
6.69524 2.62534 5.72058 0.00116993269943 2957
6.49525 2.6242 5.51945 0.00223096633225 2958
6.34525 2.62339 5.36864 0.00338080652158 2959
6.19525 2.62275 5.218 0.00493401389956 2960
6.04525 2.6225 5.06775 0.00699680694941 2961
5.89525 2.623 4.91825 0.00968610170913 2962
5.74526 2.62474 4.77 0.0131217014056 2963
5.54534 2.63029 4.57563 0.0190340119989 2964
5.34569 2.64186 4.38755 0.0265739858882 2965
5.19642 2.65658 4.253 0.0333448008729 2966
4.99892 2.68777 4.08669 0.0435994479487 2967
4.853 2.72239 3.97539 0.0518797262577 2968
4.66368 2.78656 3.85024 0.063011743219 2969
2.38687 5.40132 4.18819 0.0536793906633 2970
2.372 5.60075 4.37275 0.0371444347151 2971
2.36377 5.80058 4.56435 0.0256733190596 2972
2.35964 6.00053 4.76017 0.0170994224577 2973
2.35789 6.20052 4.95841 0.0109301144225 2974
2.35748 6.35052 5.108 0.00756211523459 2975
2.3575 6.50052 5.25802 0.00504136865964 2976
2.35776 6.65052 5.40828 0.00318581862312 2977
2.35814 6.80052 5.55866 0.00184210948556 2978
6.99439 2.62535 5.71974 0.00118616814062 2979
6.84439 2.62437 5.56876 0.00193552684595 2980
6.6444 2.62296 5.36736 0.00339259884776 2981
6.4944 2.62191 5.21631 0.00494500195074 2982
6.3444 2.62102 5.06542 0.00701015362662 2983
6.1944 2.62053 4.91493 0.00970900810561 2984
6.0444 2.62082 4.76522 0.0131673111845 2985
5.84442 2.62343 4.56785 0.0191603529644 2986
5.64455 2.63047 4.37502 0.0268401544113 2987
5.4451 2.64502 4.19012 0.0363094937592 2988
5.24687 2.67126 4.01813 0.0472863787663 2989
5.0516 2.71415 3.86575 0.0590989497554 2990
4.8622 2.77804 3.74024 0.07070058745 2991
2.39087 5.50877 3.99964 0.0681524106892 2992
2.37311 5.70796 4.18107 0.0505919966566 2993
2.36522 5.85775 4.32297 0.0396836806383 2994
2.35938 6.05766 4.51704 0.0280116908309 2995
2.35685 6.25764 4.71449 0.017792054613 2996
2.35621 6.40764 4.86385 0.0127993443373 2997
2.35619 6.55764 5.01383 0.00896861573567 2998
2.35651 6.70764 5.16415 0.00608110184702 2999
2.35701 6.85764 5.31465 0.00394067798985 3000
7.14303 2.62425 5.56728 0.002042039604 3001
6.94304 2.62261 5.36565 0.00352764992496 3002
6.79304 2.62125 5.21429 0.00511022687359 3003
6.59305 2.61945 5.0125 0.0080566942242 3004
6.39306 2.61808 4.81114 0.0122369761616 3005
6.24306 2.61781 4.66087 0.0163695359762 3006
6.09306 2.61878 4.51184 0.0214861759583 3007
5.94309 2.62182 4.36491 0.0276619428387 3008
5.74332 2.63113 4.17445 0.0375156485546 3009
5.54424 2.65001 3.99425 0.0489695803296 3010
5.34711 2.68341 3.83052 0.061549437009 3011
5.20198 2.72117 3.72315 0.0711228148692 3012
2.36798 5.91895 4.08693 0.0563365286296 3013
2.36104 6.06879 4.22983 0.0442887008475 3014
2.35627 6.26873 4.425 0.0312073567678 3015
2.35457 6.46872 4.62329 0.0209734475528 3016
2.35442 6.61872 4.77314 0.0152819859132 3017
2.35479 6.76872 4.92351 0.0108745265405 3018
2.35542 6.91872 5.07414 0.00752329566166 3019
2.35616 7.06872 5.22488 0.00501771146729 3020
7.29072 2.62281 5.41353 0.00333840300818 3021
7.14072 2.62129 5.26201 0.00482722343189 3022
6.94074 2.61904 5.05978 0.00761462915547 3023
6.79075 2.6173 4.90805 0.0104755070724 3024
6.59076 2.6153 4.70606 0.0155822335306 3025
6.44076 2.61448 4.55524 0.0205534166576 3026
6.29076 2.61487 4.40563 0.0266137005636 3027
6.14078 2.61734 4.25812 0.0339918771732 3028
5.94098 2.62602 4.067 0.0453105802583 3029
5.74188 2.64466 3.88654 0.0584257726094 3030
5.54485 2.67858 3.72343 0.0712561469108 3031
5.4 2.71739 3.61739 0.0810161910885 3032
2.36607 6.0863 3.95237 0.0686982398989 3033
2.35868 6.23612 4.0948 0.0548737209241 3034
2.35381 6.43605 4.28986 0.0394108904827 3035
2.35249 6.58605 4.43854 0.0300468702603 3036
2.35232 6.73605 4.58837 0.0224687687756 3037
2.35281 6.88605 4.73886 0.0164689558414 3038
2.35396 7.08604 4.94 0.0105241119738 3039
2.35494 7.23604 5.09098 0.00728856712628 3040
7.43799 2.62098 5.25897 0.00528873601634 3041
7.288 2.61909 5.10709 0.00739642471775 3042
7.08802 2.61631 4.90433 0.0112678246099 3043
6.88804 2.61349 4.70153 0.0166440739246 3044
6.73805 2.61173 4.54978 0.0218928775153 3045
6.53806 2.61074 4.3488 0.0307051065107 3046
6.38806 2.61202 4.20008 0.0386728043588 3047
6.18819 2.61871 4.0069 0.0508480598518 3048
6.0386 2.62967 3.86827 0.0607677728318 3049
5.84046 2.6565 3.69696 0.0743026891471 3050
1.6 2.4 4.0 0.320732868741 3060
