# Supplementary material for: Revisiting the F + HCl → HF + Cl reaction using a multireference coupled-cluster method
Source: Royal Society of Chemistry journal article supplement (doi:10.1039/c6cp05782a), 2016-01-01
Supplement: c6cp05782a2.tgz [file c6cp05782a2.tgz › supp_info_MRCC_PES/three_body_points/three_body_close_TS]

1.8 2.1 3.3 0.434512011362 1
1.8 2.4 3.6 0.343434433827 2
2.1 2.4 3.3 0.358439439847 3
2.1 2.7 3.6 0.279455411314 4
1.8 1.5 3.3 0.50594451607 5
1.8 1.8 3.6 0.422948850136 6
1.8 2.1 3.9 0.349782681562 7
1.8 2.4 4.2 0.284630953078 8
2.1 1.5 3.0 0.459985643983 9
2.1 1.8 3.3 0.393131764081 10
2.1 2.1 3.6 0.326678914168 11
2.1 2.4 3.9 0.265747703233 12
2.1 2.7 4.2 0.211987250198 13
2.1 3.0 4.5 0.165558368971 14
2.4 1.8 3.0 0.371512043833 15
2.4 2.1 3.3 0.317306310799 16
2.4 2.4 3.6 0.260804807666 17
2.4 2.7 3.9 0.207917729629 18
2.4 3.0 4.2 0.162294512439 19
2.4 3.3 4.5 0.124680536792 20
2.7 2.4 3.3 0.260747647638 21
2.7 2.7 3.6 0.211020128021 22
2.7 3.0 3.9 0.162970120491 23
2.7 3.3 4.2 0.124187396587 24
2.7 3.6 4.5 0.0936191885538 25
3.0 3.0 3.6 0.170372270067 26
3.0 3.3 3.9 0.131054835647 27
3.0 3.6 4.2 0.0962363785112 28
2.1 1.2 3.3 0.400805969195 29
2.1 1.5 3.6 0.374697772145 30
2.1 1.8 3.9 0.319464229147 31
2.1 2.1 4.2 0.273789170682 32
2.1 2.4 4.5 0.232987915051 33
2.1 2.7 4.8 0.194469388276 34
2.4 1.5 3.3 0.328969920209 35
2.4 1.8 3.6 0.282466160427 36
2.4 2.1 3.9 0.239137154019 37
2.4 2.4 4.2 0.199676716068 38
2.4 2.7 4.5 0.166788628901 39
2.4 3.0 4.8 0.136183123755 40
2.7 1.8 3.3 0.262411519149 41
2.7 2.1 3.6 0.222607473336 42
2.7 2.4 3.9 0.185315582224 43
2.7 2.7 4.2 0.151050469536 44
2.7 3.0 4.5 0.122639139551 45
2.7 3.3 4.8 0.0988236155731 46
3.0 2.1 3.3 0.216285448545 47
3.0 2.4 3.6 0.179698418885 48
3.0 2.7 3.9 0.144364624497 49
3.0 3.0 4.2 0.115626015474 50
3.0 3.3 4.5 0.0914085022383 51
3.0 3.6 4.8 0.0715853138992 52
3.3 2.7 3.6 0.146619252195 53
3.3 3.0 3.9 0.117280369813 54
3.3 3.3 4.2 0.088894991871 55
3.3 3.6 4.5 0.0694972422297 56
3.3 3.9 4.8 0.0526916792825 57
2.4 1.2 3.6 0.274026860721 59
2.4 1.5 3.9 0.26854874979 60
2.4 1.8 4.2 0.234116748825 61
2.4 2.1 4.5 0.206805704156 62
2.4 2.4 4.8 0.183532637394 63
2.4 2.7 5.1 0.161512912191 64
2.7 1.5 3.6 0.231037714736 65
2.7 1.8 3.9 0.198781026446 66
2.7 2.1 4.2 0.171551947802 67
2.7 2.4 4.5 0.147439708126 68
2.7 2.7 4.8 0.128018880887 69
2.7 3.0 5.1 0.11112542156 70
2.7 3.3 5.4 0.0928131425925 71
3.0 1.5 3.3 0.211878218818 72
3.0 1.8 3.6 0.18110361982 73
3.0 2.1 3.9 0.152669488689 74
3.0 2.4 4.2 0.127728717655 75
3.0 2.7 4.5 0.10811462341 76
3.0 3.0 4.8 0.0924879781927 77
3.0 3.3 5.1 0.0786705186248 78
3.0 3.6 5.4 0.0657207704274 79
3.3 2.1 3.6 0.146285950481 80
3.3 2.7 4.2 0.0962798434094 82
3.3 3.0 4.5 0.0787586648993 83
3.3 3.3 4.8 0.0661297391159 84
3.3 3.6 5.1 0.0557454481451 85
3.6 2.4 3.6 0.122390155831 86
3.6 3.3 4.5 0.0579311633011 89
3.6 3.6 4.8 0.0472453084469 90
3.6 3.9 5.1 0.0394916015471 91
3.9 3.6 4.5 0.0440308682669 93
3.9 3.9 4.8 0.0345612272457 94
2.7 1.2 3.9 0.178490256016 95
2.7 1.5 4.2 0.187190562721 96
2.7 1.8 4.5 0.165536364112 97
2.7 2.1 4.8 0.150191731526 98
2.7 2.4 5.1 0.137900376338 99
2.7 2.7 5.4 0.127029991876 100
3.0 1.5 3.9 0.158063590264 101
3.0 1.8 4.2 0.135473430023 102
3.0 2.1 4.5 0.118174550218 103
3.0 2.4 4.8 0.104925146306 104
3.0 2.7 5.1 0.0951905329542 105
3.0 3.0 5.4 0.0869806188141 106
3.0 3.3 5.7 0.0778708929439 107
3.3 1.8 3.9 0.121086467461 108
3.3 2.1 4.2 0.100918919816 109
3.3 2.4 4.5 0.084949855971 110
3.3 2.7 4.8 0.0734163860993 111
3.3 3.0 5.1 0.0653865239257 112
3.3 3.3 5.4 0.0594022209782 113
3.3 3.6 5.7 0.0533266424952 114
3.6 2.1 3.9 0.0963969353909 115
3.6 2.7 4.5 0.0616155453846 117
3.6 3.0 4.8 0.0509925743186 118
3.6 3.3 5.1 0.0441598830886 119
3.6 3.6 5.4 0.0396228267313 120
3.9 2.4 3.9 0.0793790406751 121
3.9 3.0 4.5 0.0456740501565 123
3.9 3.3 4.8 0.0357923235772 124
3.9 3.6 5.1 0.0297649557084 125
3.9 3.9 5.4 0.026109724059 126
4.2 3.6 4.8 0.0260886845366 128
3.0 1.2 4.2 0.10790610954 129
3.0 1.5 4.5 0.126710472007 130
3.0 1.8 4.8 0.113366414887 131
3.0 2.1 5.1 0.107044784433 132
3.0 2.4 5.4 0.10030762123 133
3.0 2.7 5.7 0.0954797240094 134
3.3 1.5 4.2 0.10444365143 135
3.3 1.8 4.5 0.0888354307359 136
3.3 2.1 4.8 0.0780290209368 137
3.3 2.4 5.1 0.0706398868595 138
3.3 2.7 5.4 0.0656147939796 139
3.3 3.0 5.7 0.0619839269608 140
3.6 1.8 4.2 0.0779588323593 141
3.6 2.1 4.5 0.0639506164731 142
3.6 2.4 4.8 0.0540304005253 143
3.6 2.7 5.1 0.047246753797 144
3.6 3.0 5.4 0.0429695929249 145
3.6 3.3 5.7 0.0402369394487 146
3.9 2.4 4.5 0.0470568549453 148
3.9 2.7 4.8 0.0376793089107 149
3.9 3.0 5.1 0.031277492174 150
3.9 3.3 5.4 0.0275462415415 151
3.9 3.6 5.7 0.0254061868455 152
4.2 3.3 5.1 0.0209501988193 155
4.2 3.6 5.4 0.0175996687179 156
3.3 1.5 4.8 0.0831363619222 157
3.3 1.8 5.1 0.0753975561004 158
3.3 2.1 5.4 0.0697380627091 159
3.3 2.4 5.7 0.0662283465635 160
3.6 1.8 4.8 0.0559190537202 161
3.6 2.1 5.1 0.0493517811595 162
3.6 2.4 5.4 0.0452971798227 163
3.6 2.7 5.7 0.0425703952042 164
3.6 3.0 6.0 0.0407962844004 165
3.9 2.1 4.8 0.0387232567991 166
3.9 2.7 5.4 0.0289981128569 168
3.9 3.0 5.7 0.0266167028601 169
3.9 3.3 6.0 0.025311426902 170
4.2 2.4 4.8 0.027645947367 171
4.2 3.0 5.4 0.0183598513536 173
4.2 3.3 5.7 0.0162603761804 174
4.5 3.3 5.4 0.0117648765753 176
3.9 2.4 5.7 0.0276386114099 177
4.2 2.4 5.4 0.0190677011333 178
