# Supplementary material for: Revisiting the F + HCl → HF + Cl reaction using a multireference coupled-cluster method
Source: Royal Society of Chemistry journal article supplement (doi:10.1039/c6cp05782a), 2016-01-01
Supplement: c6cp05782a2.tgz [file c6cp05782a2.tgz › supp_info_MRCC_PES/three_body_points/three_body_extra]

12.83071 10.04971 2.781 2.99139127275e-05 1
12.3307 9.54971 2.78099 3.55711443729e-05 2
11.83069 9.04971 2.78098 4.57969230139e-05 3
11.33065 8.54971 2.78094 6.49893107747e-05 4
10.83056 8.04971 2.78085 0.000104813266846 5
10.33032 7.54971 2.78061 0.000197378347258 6
9.82976 7.04971 2.78005 0.000428360852534 7
9.32841 6.54971 2.7787 0.00101328249121 8
8.77475 5.99973 2.77502 0.0026856437722 9
8.267 5.49979 2.76721 0.00635406677255 10
7.75082 5.00007 2.75075 0.0143562645013 11
7.2209 4.50105 2.71985 0.0300714274175 12
6.62043 3.95364 2.66679 0.0608820672079 13
6.07331 3.45613 2.61718 0.103364361592 14
5.53688 2.90765 2.62923 0.160047496626 15
5.32339 2.47086 2.85253 0.185897795113 16
5.61125 2.25892 3.35233 0.137839578449 17
6.1151 2.21503 3.90007 0.0736990155548 18
7.21973 2.21971 5.00002 0.0115309935397 19
7.72337 2.22336 5.50001 0.00414698886523 20
8.27546 2.22546 6.05 0.00122726436228 21
8.77633 2.22633 6.55 0.000334002615881 22
9.27672 2.22672 7.05 2.03528940806e-05 23
9.77689 2.22689 7.55 -8.63450461749e-05 24
10.27695 2.22695 8.05 -0.000114663539554 25
10.77698 2.22698 8.55 -0.000111465958234 26
11.27699 2.22699 9.05 -9.63037822835e-05 27
11.777 2.227 9.55 -7.82040603755e-05 28
12.83071 10.04971 2.781 2.99139127275e-05 29
12.3307 9.54971 2.78099 3.55711443729e-05 30
11.83069 9.04971 2.78098 4.57969230139e-05 31
11.33065 8.54971 2.78094 6.49893107747e-05 32
10.83056 8.04971 2.78085 0.000104813266846 33
10.33032 7.54971 2.78061 0.000197378347258 34
9.82976 7.04971 2.78005 0.000428360852534 35
9.32841 6.54971 2.7787 0.00101328249121 36
8.77475 5.99973 2.77502 0.0026856437722 37
8.267 5.49979 2.76721 0.00635406677255 38
7.75082 5.00007 2.75075 0.0143562645013 39
7.2209 4.50105 2.71985 0.0300714274175 40
6.62043 3.95364 2.66679 0.0608820672079 41
6.07331 3.45613 2.61718 0.103364361592 42
5.53688 2.90765 2.62923 0.160047496626 43
5.32339 2.47086 2.85253 0.185897795113 44
5.61125 2.25892 3.35233 0.137839578449 45
6.1151 2.21503 3.90007 0.0736990155548 46
7.21973 2.21971 5.00002 0.0115309935397 47
7.72337 2.22336 5.50001 0.00414698886523 48
8.27546 2.22546 6.05 0.00122726436228 49
8.77633 2.22633 6.55 0.000334002615881 50
9.27672 2.22672 7.05 2.03528940806e-05 51
9.77688 2.22688 7.55 -8.63441646256e-05 52
10.27695 2.22695 8.05 -0.000114663539554 53
10.77698 2.22698 8.55 -0.000111465958234 54
11.27699 2.22699 9.05 -9.63037822835e-05 55
11.777 2.227 9.55 -7.82040603755e-05 56
12.83071 10.04971 2.781 2.99139127275e-05 57
12.3307 9.54971 2.78099 3.55711443729e-05 58
11.83069 9.04971 2.78098 4.57969230139e-05 59
11.33065 8.54971 2.78094 6.49893107747e-05 60
10.83056 8.04971 2.78085 0.000104813266846 61
10.33032 7.54971 2.78061 0.000197378347258 62
9.82976 7.04971 2.78005 0.000428360852534 63
9.32841 6.54971 2.7787 0.00101328249121 64
8.77475 5.99973 2.77502 0.0026856437722 65
8.267 5.49979 2.76721 0.00635406677255 66
7.75082 5.00007 2.75075 0.0143562645013 67
7.2209 4.50105 2.71985 0.0300714274175 68
6.62043 3.95364 2.66679 0.0608820672079 69
6.07331 3.45613 2.61718 0.103364361592 70
5.53688 2.90765 2.62923 0.160047496626 71
5.32339 2.47086 2.85253 0.185897795113 72
5.61125 2.25892 3.35233 0.137839578449 73
6.1151 2.21503 3.90007 0.0736990155548 74
7.21973 2.21971 5.00002 0.0115309935397 75
7.72337 2.22336 5.50001 0.00414698886523 76
8.27546 2.22546 6.05 0.00122726436228 77
8.77633 2.22633 6.55 0.000334002615881 78
9.27672 2.22672 7.05 2.03528940806e-05 79
9.77688 2.22688 7.55 -8.63441646256e-05 80
10.27695 2.22695 8.05 -0.000114663539554 81
10.77698 2.22698 8.55 -0.000111465958234 82
11.27699 2.22699 9.05 -9.63037822835e-05 83
11.777 2.227 9.55 -7.82040603755e-05 84
12.3096 10.5286 2.781 2.65263221821e-05 85
11.7596 9.9786 2.781 3.04164572637e-05 86
11.25959 9.4786 2.78099 3.77104405533e-05 87
10.75957 8.9786 2.78097 5.17663058808e-05 88
10.25953 8.4786 2.78093 7.94930869437e-05 89
9.75942 7.9786 2.78082 0.000137939232282 90
9.25915 7.4786 2.78055 0.000272215571952 91
8.75849 6.9786 2.77989 0.00060008370113 92
8.20668 6.42861 2.77807 0.00153731642913 93
7.70277 5.92862 2.77415 0.00365324903855 94
7.14318 5.37871 2.76447 0.00916695826993 95
6.57391 4.82908 2.74483 0.0215567569043 96
6.04725 4.32983 2.71742 0.0434130654286 97
5.52428 3.83041 2.69387 0.080249024546 98
5.0048 3.28194 2.72286 0.147533828215 99
4.696 2.81179 2.88421 0.178791010601 100
4.71844 2.43919 3.27925 0.126695916195 101
7.075 2.225 5.85 0.000896780769174 102
7.57604 2.22604 6.35 -7.36770124069e-05 103
8.07657 2.22657 6.85 -0.000328854116239 104
8.57682 2.22682 7.35 -0.000356575137582 105
9.07693 2.22693 7.85 -0.000319035431014 106
9.57697 2.22697 8.35 -0.000266015941468 107
10.07699 2.22699 8.85 -0.000213415910326 108
10.577 2.227 9.35 -0.000167199353069 109
11.127 2.227 9.9 -0.00012550694012 110
11.677 2.227 10.45 -9.29022093103e-05 111
12.331 10.55 2.781 2.64324594318e-05 112
11.781 10.0 2.781 3.02000039376e-05 113
11.28099 9.5 2.78099 3.72902712358e-05 114
10.78097 9.0 2.78097 5.0955686361e-05 115
10.28093 8.5 2.78093 7.78576555839e-05 116
9.78083 8.0 2.78083 0.000134368673173 117
9.28057 7.5 2.78057 0.00026374425956 118
8.77993 7.0 2.77993 0.000579140437281 119
8.27841 6.5 2.77841 0.00135813599844 120
7.72441 5.95002 2.77439 0.00352160780776 121
7.21628 5.45009 2.76619 0.00815994814751 122
6.70056 4.95035 2.75021 0.0179737775409 123
6.12274 4.4011 2.72164 0.0394834944745 124
5.5976 3.90178 2.69582 0.0739069981721 125
4.72411 2.87433 2.84978 0.169451749296 127
4.6772 2.50186 3.17534 0.141242239138 128
6.90313 2.22452 5.67861 0.00158960851993 129
7.45444 2.22584 6.2286 6.53559797736e-05 130
7.95508 2.22648 6.7286 -0.000298468966681 131
8.45538 2.22678 7.2286 -0.000359141221122 132
8.95551 2.22691 7.7286 -0.0003305875371 133
9.45556 2.22696 8.2286 -0.000279209026938 134
9.95558 2.22698 8.7286 -0.000225752270312 135
10.45559 2.22699 9.2286 -0.000177710715785 136
10.9556 2.227 9.7286 -0.000137471745912 137
11.5056 2.227 10.2786 -0.00010216474438 138
11.81566 11.03466 2.781 2.554121344e-05 139
11.26566 10.48466 2.781 2.76767873112e-05 140
10.71566 9.93466 2.781 3.25821703346e-05 141
10.21565 9.43466 2.78099 4.14307492528e-05 142
9.71562 8.93466 2.78096 5.84320725523e-05 143
9.21556 8.43466 2.7809 9.21677469846e-05 144
8.71542 7.93466 2.78076 0.000162504066389 145
8.21507 7.43466 2.78041 0.000319117776971 146
7.66409 6.88467 2.77942 0.000748342774845 147
7.16197 6.38467 2.7773 0.00173229128588 148
6.65745 5.88469 2.77276 0.00407554027288 149
6.14906 5.38476 2.7643 0.00938397330339 150
5.58615 4.83492 2.75123 0.0221737857251 151
5.0337 4.28498 2.74872 0.0491906546456 152
4.54056 3.73822 2.80234 0.093685464087 153
4.19165 3.21746 2.97419 0.148318302073 154
4.05118 2.76621 3.28497 0.135865197889 155
6.47558 2.22558 6.25 0.000149229264663 156
6.97627 2.22627 6.75 -0.000276733124174 157
7.47667 2.22667 7.25 -0.000362248856007 158
7.97686 2.22686 7.75 -0.000342354895839 159
8.47694 2.22694 8.25 -0.000293098187253 160
8.97698 2.22698 8.75 -0.000239174021524 161
9.47699 2.22699 9.25 -0.000189614324975 162
9.977 2.227 9.75 -0.000147608902174 163
10.527 2.227 10.3 -0.000110421259737 164
11.077 2.227 10.85 -8.16310779916e-05 165
11.831 11.05 2.781 2.55083174903e-05 166
11.281 10.5 2.781 2.75871294374e-05 167
10.73099 9.95 2.78099 3.23903822233e-05 168
10.18098 9.4 2.78098 4.22818862721e-05 169
9.68096 8.9 2.78096 6.00882186664e-05 170
9.1809 8.4 2.7809 9.55234835708e-05 171
8.68074 7.9 2.78074 0.000169704778993 172
8.18037 7.4 2.78037 0.000335675583917 173
7.67946 6.9 2.77946 0.000729863956915 174
7.12709 6.35001 2.77708 0.0018380790552 175
6.62235 5.85003 2.77232 0.00432272966592 176
6.06255 5.30012 2.76243 0.0107614983724 177
5.55073 4.80026 2.75047 0.0233476168178 178
5.0001 4.25033 2.74977 0.0513702349489 179
4.51339 3.70423 2.80916 0.0971362132021 180
4.17619 3.18647 2.98972 0.15110765918 181
4.05183 2.77737 3.27446 0.13712477679 182
6.51029 2.22563 6.28466 9.86579445129e-05 183
7.01096 2.2263 6.78466 -0.000289433491069 184
7.51135 2.22669 7.28466 -0.000362886031086 185
8.01153 2.22687 7.78466 -0.000339449322417 186
8.51161 2.22695 8.28466 -0.00028936220668 187
9.01164 2.22698 8.78466 -0.000235534526836 188
9.51165 2.22699 9.28466 -0.000186445831695 189
10.01166 2.227 9.78466 -0.000144996331092 190
10.56166 2.227 10.33466 -0.000108372775066 191
11.11166 2.227 10.88466 -8.00662569966e-05 192
11.81566 11.03466 2.781 2.554121344e-05 193
11.26566 10.48466 2.781 2.76767873112e-05 194
10.71566 9.93466 2.781 3.25821703346e-05 195
10.21565 9.43466 2.78099 4.14307492528e-05 196
9.71562 8.93466 2.78096 5.84320725523e-05 197
9.21556 8.43466 2.7809 9.21677469846e-05 198
8.71542 7.93466 2.78076 0.000162504066389 199
8.21507 7.43466 2.78041 0.000319117776971 200
7.66409 6.88467 2.77942 0.000748342774845 201
7.16197 6.38467 2.7773 0.00173229128588 202
6.65745 5.88469 2.77276 0.00407554027288 203
6.14906 5.38476 2.7643 0.00938397330339 204
5.58615 4.83492 2.75123 0.0221737857251 205
5.0337 4.28498 2.74872 0.0491906546456 206
4.54056 3.73822 2.80234 0.093685464087 207
4.19165 3.21746 2.97419 0.148318302073 208
4.05118 2.76621 3.28497 0.135865197889 209
6.47558 2.22558 6.25 0.000149229264663 210
6.97627 2.22627 6.75 -0.000276733124174 211
7.47667 2.22667 7.25 -0.000362248856007 212
7.97686 2.22686 7.75 -0.000342354895839 213
8.47694 2.22694 8.25 -0.000293098187253 214
8.97698 2.22698 8.75 -0.000239174021524 215
9.47699 2.22699 9.25 -0.000189614324975 216
9.977 2.227 9.75 -0.000147608902174 217
10.527 2.227 10.3 -0.000110421259737 218
11.077 2.227 10.85 -8.16310779916e-05 219
11.29292 11.51192 2.781 2.53716496427e-05 220
10.74292 10.96192 2.781 2.65210199599e-05 221
10.19292 10.41192 2.781 2.94815403718e-05 222
9.69291 9.91192 2.78099 3.48758032945e-05 223
9.19289 9.41192 2.78097 4.51726950603e-05 224
8.69284 8.91192 2.78092 6.5347543598e-05 225
8.19271 8.41192 2.78079 0.000105648673474 226
7.69239 7.91192 2.78047 0.000188605857868 227
7.19162 7.41192 2.7797 0.00037283133165 228
6.63957 6.86193 2.77764 0.000888844900669 229
6.08481 6.31195 2.77286 0.00229472367542 230
5.57656 5.81202 2.76454 0.00552804760534 231
5.06521 5.31215 2.75306 0.0131163099117 232
4.51216 4.76221 2.74995 0.0322737876434 233
3.66231 3.69298 2.96933 0.131159241679 235
3.4792 3.26033 3.21887 0.165669332487 236
3.39276 2.83103 3.56173 0.1424289681 237
5.77402 2.22402 6.55 0.000610688118507 238
6.27553 2.22553 7.05 -3.9261779024e-05 239
6.77634 2.22634 7.55 -0.000233306823135 240
7.27672 2.22672 8.05 -0.000263999601264 241
7.77689 2.22689 8.55 -0.000239645497744 242
8.27695 2.22695 9.05 -0.000201115383429 243
8.77698 2.22698 9.55 -0.000162279250369 244
9.27699 2.22699 10.05 -0.000127810490342 245
9.777 2.227 10.55 -9.91315488074e-05 246
10.327 2.227 11.1 -7.41724174657e-05 247
11.331 11.55 2.781 2.53387834713e-05 248
10.781 11.0 2.781 2.63933039282e-05 249
10.231 10.45 2.781 2.91961368667e-05 250
9.73099 9.95 2.78099 3.43326656182e-05 251
9.23097 9.45 2.78097 4.41269346098e-05 252
8.73092 8.95 2.78092 6.32784908984e-05 253
8.2308 8.45 2.7808 0.000101487252912 254
7.7305 7.95 2.7805 0.000179843114296 255
7.22978 7.45 2.77978 0.000352627707739 256
6.7281 6.95 2.7781 0.000767940053713 257
6.17391 6.40002 2.77389 0.00196629768345 258
5.61541 5.85009 2.76532 0.00517123020017 259
5.10413 5.35022 2.75391 0.0122943225792 260
4.59869 4.85027 2.74842 0.0280932096175 261
4.08877 4.30206 2.78671 0.0630148881129 262
3.70729 3.77354 2.93375 0.120374822527 263
3.5038 3.33368 3.17012 0.1638965249 264
3.39775 2.89575 3.502 0.148831974016 265
5.7358 2.22387 6.51193 0.000696129350556 266
6.28747 2.22555 7.06192 -4.74023494869e-05 267
6.78828 2.22636 7.56192 -0.00023528848328 268
7.28865 2.22673 8.06192 -0.000263811884348 269
7.78881 2.22689 8.56192 -0.000238801668013 270
8.28888 2.22696 9.06192 -0.00020016540368 271
8.7889 2.22698 9.56192 -0.000161395699571 272
9.28891 2.22699 10.06192 -0.000126997159668 273
9.78892 2.227 10.56192 -9.85089894467e-05 274
10.33892 2.227 11.11192 -7.37008896168e-05 275
11.29292 11.51192 2.781 2.53716496427e-05 276
10.74292 10.96192 2.781 2.65210199599e-05 277
10.19292 10.41192 2.781 2.94815403718e-05 278
9.69291 9.91192 2.78099 3.48758032945e-05 279
9.19289 9.41192 2.78097 4.51726950603e-05 280
8.69284 8.91192 2.78092 6.5347543598e-05 281
8.19271 8.41192 2.78079 0.000105648673474 282
7.69239 7.91192 2.78047 0.000188605857868 283
7.19162 7.41192 2.7797 0.00037283133165 284
6.63957 6.86193 2.77764 0.000888844900669 285
6.08481 6.31195 2.77286 0.00229472367542 286
5.57656 5.81202 2.76454 0.00552804760534 287
5.06521 5.31215 2.75306 0.0131163099117 288
4.51216 4.76221 2.74995 0.0322737876434 289
3.66231 3.69298 2.96933 0.131159241679 291
3.4792 3.26033 3.21887 0.165669332487 292
3.39276 2.83103 3.56173 0.1424289681 293
5.77402 2.22402 6.55 0.000610688118507 294
6.27553 2.22553 7.05 -3.9261779024e-05 295
6.77634 2.22634 7.55 -0.000233306823135 296
7.27672 2.22672 8.05 -0.000263999601264 297
7.77689 2.22689 8.55 -0.000239645497744 298
8.27695 2.22695 9.05 -0.000201115383429 299
8.77698 2.22698 9.55 -0.000162279250369 300
9.27699 2.22699 10.05 -0.000127810490342 301
9.777 2.227 10.55 -9.91315488074e-05 302
10.327 2.227 11.1 -7.41724174657e-05 303
11.331 11.55 2.781 2.53387834713e-05 304
10.781 11.0 2.781 2.63933039282e-05 305
10.231 10.45 2.781 2.91961368667e-05 306
9.73099 9.95 2.78099 3.43326656182e-05 307
9.23097 9.45 2.78097 4.41269346098e-05 308
8.73092 8.95 2.78092 6.32784908984e-05 309
8.2308 8.45 2.7808 0.000101487252912 310
7.7305 7.95 2.7805 0.000179843114296 311
7.22978 7.45 2.77978 0.000352627707739 312
6.7281 6.95 2.7781 0.000767940053713 313
6.17391 6.40002 2.77389 0.00196629768345 314
5.61541 5.85009 2.76532 0.00517123020017 315
5.10413 5.35022 2.75391 0.0122943225792 316
4.59869 4.85027 2.74842 0.0280932096175 317
4.08877 4.30206 2.78671 0.0630148881129 318
3.70729 3.77354 2.93375 0.120374822527 319
3.5038 3.33368 3.17012 0.1638965249 320
3.39775 2.89575 3.502 0.148831974016 321
5.7358 2.22387 6.51193 0.000696129350556 322
6.28747 2.22555 7.06192 -4.74023494869e-05 323
6.78828 2.22636 7.56192 -0.00023528848328 324
7.28865 2.22673 8.06192 -0.000263811884348 325
7.78881 2.22689 8.56192 -0.000238801668013 326
8.28888 2.22696 9.06192 -0.00020016540368 327
8.7889 2.22698 9.56192 -0.000161395699571 328
9.28891 2.22699 10.06192 -0.000126997159668 329
9.78892 2.227 10.56192 -9.85089894467e-05 330
10.33892 2.227 11.11192 -7.37008896168e-05 331
1.384 11.0658 10.3182 -0.000188309093562 333
1.384 10.67689 10.70711 -0.00013305304063 334
1.384 10.28798 11.09602 -0.000117061812592 335
10.78882 12.00782 2.781 2.4963068677e-05 336
10.23882 11.45782 2.781 2.54373621498e-05 337
9.73881 10.95782 2.78099 2.71524273979e-05 338
9.2388 10.45782 2.78098 3.11330656479e-05 339
8.73877 9.95782 2.78095 3.95181553507e-05 340
8.23869 9.45782 2.78087 5.66735931897e-05 341
7.73848 8.95782 2.78066 9.13277708674e-05 342
7.23797 8.45782 2.78015 0.000162939679203 343
6.73672 7.95782 2.7789 0.00032116198873 344
6.18332 7.40784 2.77548 0.000757820011485 345
5.67607 6.90789 2.76818 0.00179981395814 346
5.10881 6.35818 2.75063 0.00496938517056 347
4.57973 5.8591 2.72063 0.0128085309673 348
3.98495 5.3111 2.67385 0.0351526524749 349
3.45838 4.812 2.64638 0.0791754425688 350
2.97885 4.26756 2.71129 0.155085956298 351
2.70497 3.7681 2.93687 0.231063927358 352
2.58527 3.32422 3.26105 0.258391566011 353
2.53007 2.90877 3.6213 0.219148150192 354
5.31991 2.21989 7.10002 0.00141003811487 355
5.87408 2.22408 7.65 0.000218186133355 356
6.37576 2.22576 8.15 -0.000112420984702 357
6.87649 2.22649 8.65 -0.000198840003575 358
7.37679 2.22679 9.15 -0.000197200102773 359
7.87692 2.22692 9.65 -0.000170222906228 360
8.37697 2.22697 10.15 -0.000139735542661 361
8.87699 2.22699 10.65 -0.000111393209878 362
9.427 2.227 11.2 -8.50637465065e-05 363
9.977 2.227 11.75 -6.45485214346e-05 364
10.831 12.05 2.781 2.49666854763e-05 365
10.281 11.5 2.781 2.53590437719e-05 366
9.78099 11.0 2.78099 2.69398357012e-05 367
9.28098 10.5 2.78098 3.06678410592e-05 368
8.78095 10.0 2.78095 3.85535007475e-05 369
8.28087 9.5 2.78087 5.47158273177e-05 370
7.78069 9.0 2.78069 8.73677483944e-05 371
7.28021 8.5 2.78021 0.000154586257242 372
6.77905 8.0 2.77905 0.000302117579069 373
6.22588 7.45001 2.77587 0.000706869143225 374
5.66809 6.90007 2.76802 0.00182526467919 375
5.1528 6.40032 2.75248 0.00458990959077 376
4.57135 5.85131 2.72004 0.012998707454 377
4.03062 5.35312 2.6775 0.0326317561481 378
3.45055 4.80418 2.64637 0.0800842336236 379
3.00902 4.30837 2.70065 0.148780326256 380
2.71893 3.80408 2.91485 0.225971517186 381
2.59958 3.39616 3.20342 0.258963094246 382
2.53542 2.97657 3.55885 0.22509187976 383
5.27726 2.21941 7.05785 0.00157347854815 384
5.8317 2.22387 7.60783 0.000267484229876 385
6.3836 2.22578 8.15782 -0.000115042308889 386
6.88432 2.2265 8.65782 -0.000199251457296 387
7.38462 2.2268 9.15782 -0.000196889058124 388
7.88474 2.22692 9.65782 -0.000169748675702 389
8.38479 2.22697 10.15782 -0.000139267887858 390
8.88481 2.22699 10.65782 -0.0001109790725 391
9.38482 2.227 11.15782 -8.68390826134e-05 392
9.93482 2.227 11.70782 -6.59297332945e-05 393
10.331 12.55 2.781 2.31507035284e-05 394
9.83099 12.05 2.78099 2.28815264485e-05 395
9.33098 11.55 2.78098 2.38592746564e-05 396
8.83096 11.05 2.78096 2.74097038248e-05 397
8.3309 10.55 2.7809 3.61201791964e-05 398
7.83073 10.05 2.78073 5.53079981788e-05 399
7.33033 9.55 2.78033 9.73143902124e-05 400
6.82933 9.05 2.77933 0.000193547689153 401
6.27651 8.50001 2.7765 0.000462422166589 402
5.77019 8.00005 2.77014 0.0011054374187 403
5.20351 7.45033 2.75318 0.00309623690479 404
4.67001 6.95159 2.71842 0.00827617336596 405
4.04853 6.40722 2.64131 0.0247430802575 406
1.91937 4.12431 2.79506 0.332217593308 409
1.87225 3.71263 3.15962 0.286450618395 410
1.57089 4.24828 3.32261 0.215587222797 412
1.38417 6.56085 5.82332 0.00179419286335 415
1.38424 6.20733 6.17691 0.00195762337033 416
1.38413 5.85372 6.53041 0.00309379514362 417
1.38394 7.06074 6.3232 6.74324326892e-05 420
1.38397 6.7072 6.67677 0.00034081891903 421
1.38392 6.31827 7.06565 0.000941007467188 422
1.38394 7.56069 6.82325 -0.000433907098515 425
1.38395 7.17179 7.21216 -0.000172468109656 426
1.38393 6.78287 7.60106 0.00010790172627 427
1.38396 8.06067 7.32329 -0.000525862442846 429
1.38397 7.70712 7.67685 -0.000340995178922 430
1.38396 7.31821 8.06575 -0.000195300777736 431
1.38398 8.52531 7.85867 -0.000476590643348 434
1.38399 8.17176 8.21223 -0.000332640305217 435
1.38398 7.8182 8.56578 -0.000256902899439 436
1.384 9.02531 8.35869 -0.00041114999631 439
1.38399 8.67175 8.71224 -0.000296182333721 440
1.38399 8.28284 9.10115 -0.000245109508428 441
1.384 9.56066 8.82334 -0.000352791293762 443
1.384 9.17175 9.21225 -0.000249475998432 444
1.38399 8.78284 9.60115 -0.000213513590347 445
1.384 10.06066 9.32334 -0.000288437521928 447
1.384 9.67175 9.71225 -0.000204729535444 448
1.384 9.28284 10.10116 -0.000177877561312 449
1.38399 10.5253 9.85869 -0.000226163590514 451
1.384 10.17175 10.21225 -0.000165548938608 452
1.384 9.78284 10.60116 -0.000145134382751 453
13.11314 10.03214 3.081 1.62009574657e-05 454
12.61313 9.53214 3.08099 2.10873004352e-05 455
12.1131 9.03214 3.08096 3.02647828184e-05 456
11.61303 8.53214 3.08089 4.78548177334e-05 457
11.11286 8.03214 3.08072 8.54517873169e-05 458
10.61244 7.53214 3.0803 0.000175638596981 459
10.11143 7.03214 3.07929 0.000405741301399 460
9.55865 6.48215 3.0765 0.00108931574537 461
9.00168 5.93219 3.06949 0.00290942798597 462
8.43535 5.38246 3.05289 0.00753780389286 463
7.90533 4.88345 3.02188 0.0167702186562 464
7.29895 4.33676 2.96219 0.0367600678292 465
6.73094 3.84219 2.88875 0.06741154339 466
6.12134 3.29614 2.8252 0.115083952586 467
5.6984 2.80519 2.89321 0.15721736 468
5.77667 2.47023 3.30644 0.137914351229 469
6.19969 2.3995 3.80019 0.0826524229816 470
7.80644 2.40643 5.40001 0.00508116361098 471
8.35961 2.40961 5.95 0.0015319612477 472
8.86095 2.41095 6.45 0.000438819971795 473
9.36155 2.41155 6.95 5.45660529588e-05 474
10.36192 2.41192 7.95 -0.000115661798127 476
10.86197 2.41197 8.45 -0.000115977282316 477
11.36199 2.41199 8.95 -0.000101605125531 478
11.912 2.412 9.5 -8.1249944469e-05 479
12.462 2.412 10.05 -6.19781008549e-05 480
13.11314 10.03214 3.081 1.62009574657e-05 481
12.61313 9.53214 3.08099 2.10873004352e-05 482
12.1131 9.03214 3.08096 3.02647828184e-05 483
11.61303 8.53214 3.08089 4.78548177334e-05 484
11.11286 8.03214 3.08072 8.54517873169e-05 485
10.61244 7.53214 3.0803 0.000175638596981 486
10.11143 7.03214 3.07929 0.000405741301399 487
9.55865 6.48215 3.0765 0.00108931574537 488
9.00168 5.93219 3.06949 0.00290942798597 489
8.43535 5.38246 3.05289 0.00753780389286 490
7.90533 4.88345 3.02188 0.0167702186562 491
7.29895 4.33676 2.96219 0.0367600678292 492
6.73094 3.84219 2.88875 0.06741154339 493
6.12134 3.29614 2.8252 0.115083952586 494
5.6984 2.80519 2.89321 0.15721736 495
5.77667 2.47023 3.30644 0.137914351229 496
6.19969 2.3995 3.80019 0.0826524229816 497
7.80644 2.40643 5.40001 0.00508116361098 498
8.35961 2.40961 5.95 0.0015319612477 499
8.86095 2.41095 6.45 0.000438819971795 500
9.36155 2.41155 6.95 5.45660529588e-05 501
10.36192 2.41192 7.95 -0.000115661798127 503
10.86197 2.41197 8.45 -0.000115977282316 504
11.36199 2.41199 8.95 -0.000101605125531 505
11.91199 2.41199 9.5 -8.12499018656e-05 506
12.412 2.412 10.0 -6.36130220504e-05 507
13.13099 10.05 3.08099 1.60812611197e-05 508
12.63098 9.55 3.08098 2.0853441234e-05 509
12.13096 9.05 3.08096 2.98294573887e-05 510
11.6309 8.55 3.0809 4.69880082699e-05 511
11.13073 8.05 3.08073 8.34990930145e-05 512
10.63033 7.55 3.08033 0.000170781699046 513
10.12934 7.05 3.07934 0.000393239864525 514
9.57665 6.50001 3.07664 0.00105456171269 515
9.01988 5.95005 3.06983 0.00281784600599 516
8.45397 5.4003 3.05367 0.00731576642262 517
7.9246 4.90125 3.02335 0.0163176573947 518
7.31903 4.35447 2.96456 0.0359013038331 519
6.7513 3.85985 2.89145 0.0660911096931 520
6.14004 3.31398 2.82606 0.113378119467 521
5.70777 2.82161 2.88616 0.156271994479 522
5.76493 2.47554 3.28939 0.139712222491 523
7.88921 2.40706 5.48215 0.00427191106634 525
8.44204 2.4099 6.03214 0.00126612651426 526
8.94322 2.41108 6.53214 0.000345284597485 527
9.44375 2.41161 7.03214 2.18351034055e-05 528
9.94398 2.41184 7.53214 -8.82023913522e-05 529
10.44407 2.41193 8.03214 -0.000117450807824 530
10.94411 2.41197 8.53214 -0.000114244447249 531
11.44413 2.41199 9.03214 -9.86705459485e-05 532
11.94414 2.412 9.53214 -8.00602304507e-05 533
12.59925 10.51825 3.081 1.47345794862e-05 534
12.04925 9.96825 3.081 1.81749012931e-05 535
11.54923 9.46825 3.08098 2.49626607012e-05 536
11.0492 8.96825 3.08095 3.85852909132e-05 537
10.54912 8.46825 3.08087 6.59195082427e-05 538
10.04893 7.96825 3.08068 0.000123883857534 539
9.54845 7.46825 3.0802 0.000257185607002 540
9.0473 6.96825 3.07905 0.000583842916521 541
8.49415 6.41826 3.07589 0.00152208667356 542
7.93636 5.86832 3.06804 0.00397704765134 543
7.36864 5.31863 3.05001 0.00997807315322 544
6.83789 4.81966 3.01823 0.0238805912039 545
6.23664 4.27233 2.96431 0.0478746894693 546
5.63839 3.72474 2.91365 0.0899880887649 547
5.12286 3.17737 2.94549 0.145892383807 548
4.91734 2.70633 3.21101 0.132080655062 549
7.20906 2.40906 5.8 0.00102058972219 550
7.71061 2.41061 6.3 -4.89278578812e-05 551
8.21139 2.41139 6.8 -0.000334011592645 552
8.71174 2.41174 7.3 -0.000368412216871 553
9.21189 2.41189 7.8 -0.000330729805447 554
9.71196 2.41196 8.3 -0.000276148035139 555
10.21198 2.41198 8.8 -0.000221725046632 556
10.71199 2.41199 9.3 -0.000173709494793 557
11.212 2.412 9.8 -0.000133943541785 558
11.762 2.412 10.35 -9.92677882899e-05 559
12.631 10.55 3.081 1.4617146014e-05 560
12.13099 10.05 3.08099 1.74579645582e-05 561
11.63098 9.55 3.08098 2.34958372412e-05 562
11.13096 9.05 3.08096 3.56777818289e-05 563
10.63089 8.55 3.08089 5.99975189712e-05 564
10.13072 8.05 3.08072 0.000110999063627 565
9.63031 7.55 3.08031 0.000226680664147 566
9.12931 7.05 3.07931 0.000508201342924 567
8.57657 6.50001 3.07656 0.00131818501092 568
8.01973 5.95005 3.06968 0.0034538894021 569
7.45394 5.4003 3.05364 0.0087365545329 570
6.8721 4.85132 3.02078 0.0205513988996 571
6.32676 4.35361 2.97315 0.0432644668741 572
5.77871 3.85619 2.92252 0.0780802861112 573
5.23011 3.30714 2.92297 0.133849600507 574
4.92104 2.80123 3.11981 0.143335390963 575
7.07673 2.40848 5.66825 0.00157822810206 576
7.57854 2.41029 6.16825 0.000120479711856 577
8.07948 2.41123 6.66825 -0.000295862330031 578
8.57992 2.41167 7.16825 -0.000370345907637 579
9.08012 2.41187 7.66825 -0.000343487207473 580
9.5802 2.41195 8.16825 -0.000290923157714 581
10.08023 2.41198 8.66825 -0.000235589733872 582
10.58024 2.41199 9.16825 -0.000185577720122 583
11.08025 2.412 9.66825 -0.000143626557498 584
11.63025 2.412 10.21825 -0.000106772167992 585
12.08734 11.00634 3.081 1.41964470863e-05 586
11.53734 10.45634 3.081 1.59336218839e-05 587
11.03733 9.95634 3.08099 1.97811183592e-05 588
10.53732 9.45634 3.08098 2.76816727751e-05 589
10.03728 8.95634 3.08094 4.33603816518e-05 590
9.5372 8.45634 3.08086 7.49113346225e-05 591
9.03697 7.95634 3.08063 0.000141001395419 592
8.53643 7.45634 3.08009 0.000289480760388 593
8.0351 6.95634 3.07876 0.000644290010097 594
7.53202 6.45635 3.07567 0.00150957352811 595
6.97416 5.90641 3.06775 0.00389758197487 596
6.45937 5.40664 3.05273 0.00900063755281 597
5.93465 4.90729 3.02736 0.0197578013312 598
5.35396 4.35821 2.99575 0.0439440289104 599
4.81181 3.80871 3.0031 0.0852933627132 600
4.43601 3.32262 3.11339 0.132161676665 601
4.26938 2.86218 3.4072 0.114176056965 602
6.86058 2.41058 6.45 -0.00018134363886 603
7.36134 2.41134 6.95 -0.000382199721099 604
7.86171 2.41171 7.45 -0.000389779530617 605
8.36188 2.41188 7.95 -0.000342718229672 606
8.86195 2.41195 8.45 -0.000283767200556 607
9.36198 2.41198 8.95 -0.000227063045879 608
9.86199 2.41199 9.45 -0.000177801078214 609
10.362 2.412 9.95 -0.0001372668037 610
10.912 2.412 10.5 -0.000101986021878 611
11.462 2.412 11.05 -7.50280647737e-05 612
12.131 11.05 3.081 1.41317800383e-05 613
11.581 10.5 3.081 1.57323508384e-05 614
11.08099 10.0 3.08099 1.93195970967e-05 615
10.58098 9.5 3.08098 2.67547799689e-05 616
10.08095 9.0 3.08095 4.15221672068e-05 617
9.58086 8.5 3.08086 7.11722367105e-05 618
9.08066 8.0 3.08066 0.000132972249177 619
8.58015 7.5 3.08015 0.00027093582332 620
8.07893 7.0 3.07893 0.000599250920277 621
7.52562 6.45001 3.07561 0.00152619755252 622
7.0187 5.95006 3.06864 0.00361707992958 623
6.45279 5.40031 3.05248 0.00909406764147 624
5.87502 4.85106 3.02396 0.0214984489525 625
5.29547 4.30192 2.99355 0.047239757092 626
4.80612 3.8024 3.00372 0.0858906144087 627
4.43242 3.31672 3.1157 0.132506111632 628
4.26936 2.85769 3.41167 0.113661568413 629
6.81683 2.41049 6.40634 -0.000144404757197 630
7.31763 2.41129 6.90634 -0.000375670663078 631
7.81803 2.41169 7.40634 -0.000392333115658 632
8.31821 2.41187 7.90634 -0.000347576360633 633
8.81829 2.41195 8.40634 -0.000288945063616 634
9.31832 2.41198 8.90634 -0.000231758585255 635
9.81833 2.41199 9.40634 -0.000181752915045 636
10.31834 2.412 9.90634 -0.000140469460133 637
10.86834 2.412 10.45634 -0.000104461902718 638
11.41834 2.412 11.00634 -7.69010174582e-05 639
12.131 11.05 3.081 1.41317800383e-05 640
11.581 10.5 3.081 1.57323508384e-05 641
11.03099 9.95 3.08099 1.9850597632e-05 642
10.53098 9.45 3.08098 2.78207834248e-05 643
10.03094 8.95 3.08094 4.36367995434e-05 644
9.53085 8.45 3.08085 7.54750852677e-05 645
9.03062 7.95 3.08062 0.000142215480584 646
8.53007 7.45 3.08007 0.00029230478852 647
8.02874 6.95 3.07874 0.000651127125022 648
7.52562 6.45001 3.07561 0.00152619755252 649
7.0187 5.95006 3.06864 0.00361707992958 650
6.45279 5.40031 3.05248 0.00909406764147 651
5.87502 4.85106 3.02396 0.0214984489525 652
5.29547 4.30192 2.99355 0.047239757092 653
4.80612 3.8024 3.00372 0.0858906144087 654
4.43242 3.31672 3.1157 0.132506111632 655
4.26936 2.85769 3.41167 0.113661568413 656
6.81683 2.41049 6.40634 -0.000144404757197 657
7.31763 2.41129 6.90634 -0.000375670663078 658
7.81803 2.41169 7.40634 -0.000392333115658 659
8.31821 2.41187 7.90634 -0.000347576360633 660
8.81829 2.41195 8.40634 -0.000288945063616 661
9.31832 2.41198 8.90634 -0.000231758585255 662
9.81833 2.41199 9.40634 -0.000181752915045 663
10.31834 2.412 9.90634 -0.000140469460133 664
10.86834 2.412 10.45634 -0.000104461902718 665
11.41834 2.412 11.00634 -7.69010174582e-05 666
12.08734 11.00634 3.081 1.41964470863e-05 667
11.53734 10.45634 3.081 1.59336218839e-05 668
11.03733 9.95634 3.08099 1.97811183592e-05 669
10.53732 9.45634 3.08098 2.76816727751e-05 670
10.03728 8.95634 3.08094 4.33603816518e-05 671
9.5372 8.45634 3.08086 7.49113346225e-05 672
9.03697 7.95634 3.08063 0.000141001395419 673
8.53643 7.45634 3.08009 0.000289480760388 674
8.0351 6.95634 3.07876 0.000644290010097 675
7.53202 6.45635 3.07567 0.00150957352811 676
6.97416 5.90641 3.06775 0.00389758197487 677
6.45937 5.40664 3.05273 0.00900063755281 678
5.93465 4.90729 3.02736 0.0197578013292 679
5.35396 4.35821 2.99575 0.0439440289104 680
4.81181 3.80871 3.0031 0.0852933627132 681
4.43601 3.32262 3.11339 0.132161676665 682
4.26938 2.86218 3.4072 0.114176056965 683
6.86058 2.41058 6.45 -0.00018134363886 684
7.36134 2.41134 6.95 -0.000382199721099 685
7.86171 2.41171 7.45 -0.000389779530617 686
8.36188 2.41188 7.95 -0.000342718229672 687
8.86195 2.41195 8.45 -0.000283767200556 688
9.36198 2.41198 8.95 -0.000227063045879 689
9.86199 2.41199 9.45 -0.000177801078214 690
10.362 2.412 9.95 -0.0001372668037 691
10.912 2.412 10.5 -0.000101986021878 692
11.462 2.412 11.05 -7.50280647737e-05 693
11.63018 11.54918 3.081 1.40006365641e-05 694
11.08018 10.99918 3.081 1.45580127414e-05 695
10.53017 10.44918 3.08099 1.66544236517e-05 696
10.03016 9.94918 3.08098 2.09161923663e-05 697
9.53014 9.44918 3.08096 2.95389765193e-05 698
9.03008 8.94918 3.0809 4.68692145319e-05 699
8.52993 8.44918 3.08075 8.20629261796e-05 700
8.02954 7.94918 3.08036 0.000155094419674 701
7.52861 7.44918 3.07943 0.000316469833303 702
6.97605 6.89919 3.07686 0.000762884308865 703
6.47065 6.39922 3.07143 0.00180556422745 704
5.90809 5.84937 3.05872 0.00472708550913 705
5.3361 5.29984 3.03626 0.0120755433784 706
4.8155 4.80029 3.01521 0.0271169235257 707
4.28347 4.25101 3.03246 0.0617269323122 708
3.88162 3.71842 3.1632 0.112879094248 709
3.67433 3.27746 3.39687 0.134280098815 710
3.61208 2.89487 3.71721 0.109989015476 711
6.25986 2.40986 6.85 -4.51706471104e-05 712
6.76103 2.41103 7.35 -0.000267325204772 713
7.26159 2.41159 7.85 -0.000301984423537 714
7.76183 2.41183 8.35 -0.000274169484852 715
8.26193 2.41193 8.85 -0.000229880286308 716
8.76197 2.41197 9.35 -0.000185381484145 717
9.26199 2.41199 9.85 -0.000146067480331 718
9.762 2.412 10.35 -0.000113368886081 719
10.312 2.412 10.9 -8.46731113979e-05 720
10.862 2.412 11.45 -6.29222650061e-05 721
11.631 11.55 3.081 1.40003532507e-05 722
11.081 11.0 3.081 1.45563554417e-05 723
10.58099 10.5 3.08099 1.63708409745e-05 724
10.03099 9.95 3.08099 2.09061109305e-05 725
9.53096 9.45 3.08096 2.95195752361e-05 726
9.0309 8.95 3.0809 4.68297005532e-05 727
8.53075 8.45 3.08075 8.19822457917e-05 728
8.03036 7.95 3.08036 0.000154923459634 729
7.52943 7.45 3.07943 0.000316078345238 730
6.97688 6.90001 3.07687 0.000761833607341 731
6.47148 6.40004 3.07144 0.00180297499412 732
5.90893 5.85019 3.05874 0.00472036218655 733
5.33695 5.30066 3.03629 0.0120590618936 734
4.81634 4.80111 3.01523 0.0270822933532 735
4.28419 4.25183 3.03236 0.0616601207234 736
3.9111 3.76593 3.14517 0.107768381819 737
3.68889 3.31993 3.36896 0.135232331387 738
3.61094 2.93023 3.68071 0.113573885415 739
6.1587 2.40952 6.74918 4.62081672815e-05 740
6.66004 2.41086 7.24918 -0.000244134626001 741
7.16069 2.41151 7.74918 -0.000302413001376 742
7.66098 2.4118 8.24918 -0.000281983219767 743
8.1611 2.41192 8.74918 -0.000239125236581 744
8.66115 2.41197 9.24918 -0.000194030802054 745
9.16117 2.41199 9.74918 -0.000153475651239 746
9.71118 2.412 10.29918 -0.000116388761691 747
10.26118 2.412 10.84918 -8.71455781865e-05 748
10.81118 2.412 11.39918 -6.46997520256e-05 749
11.631 11.55 3.081 1.40003522275e-05 750
11.081 11.0 3.081 1.45563554417e-05 751
10.531 10.45 3.081 1.66489914582e-05 752
10.03099 9.95 3.08099 2.09061109305e-05 753
9.53096 9.45 3.08096 2.95195752361e-05 754
9.0309 8.95 3.0809 4.68297005532e-05 755
8.53075 8.45 3.08075 8.19822457917e-05 756
8.03037 7.95 3.08037 0.000154922704224 757
7.52943 7.45 3.07943 0.000316078346147 758
6.97688 6.90001 3.07687 0.000761833607341 759
6.47148 6.40004 3.07144 0.00180297499412 760
5.90893 5.85019 3.05874 0.00472036218655 761
5.33695 5.30066 3.03629 0.0120590618936 762
4.81634 4.80111 3.01523 0.0270822933532 763
4.28419 4.25183 3.03236 0.0616601207234 764
3.9111 3.76593 3.14517 0.107768381819 765
3.68889 3.31993 3.36896 0.135232331387 766
3.61094 2.93023 3.68071 0.113573885415 767
6.1587 2.40952 6.74918 4.62081672815e-05 768
6.66004 2.41086 7.24918 -0.000244134626001 769
7.16069 2.41151 7.74918 -0.000302413001376 770
7.66098 2.4118 8.24918 -0.000281983219767 771
8.1611 2.41192 8.74918 -0.000239125236581 772
8.66115 2.41197 9.24918 -0.000194030802054 773
9.16117 2.41199 9.74918 -0.000153475651239 774
9.71118 2.412 10.29918 -0.000116388761691 775
10.26118 2.412 10.84918 -8.71455781865e-05 776
10.81118 2.412 11.39918 -6.46997520256e-05 777
11.631 11.55 3.081 1.40003532507e-05 778
11.081 11.0 3.081 1.45563554417e-05 779
10.531 10.45 3.081 1.66489914582e-05 780
10.03098 9.95 3.08098 2.09064072471e-05 781
9.53096 9.45 3.08096 2.95195752361e-05 782
9.0309 8.95 3.0809 4.68297005532e-05 783
8.53075 8.45 3.08075 8.19822457917e-05 784
8.03036 7.95 3.08036 0.000154923459634 785
7.52943 7.45 3.07943 0.000316078345238 786
6.97688 6.90001 3.07687 0.000761833607341 787
6.47148 6.40004 3.07144 0.00180297499412 788
5.90893 5.85019 3.05874 0.00472036218655 789
5.33695 5.30066 3.03629 0.0120590618936 790
4.81634 4.80111 3.01523 0.0270822933532 791
4.28419 4.25183 3.03236 0.0616601207234 792
3.9111 3.76593 3.14517 0.107768381819 793
3.68889 3.31993 3.36896 0.135232331387 794
3.61094 2.93023 3.68071 0.113573885415 795
6.1587 2.40952 6.74918 4.62081672815e-05 796
6.66004 2.41086 7.24918 -0.000244134626001 797
7.16069 2.41151 7.74918 -0.000302413001376 798
7.66098 2.4118 8.24918 -0.000281983219767 799
8.1611 2.41192 8.74918 -0.000239125236581 800
8.66115 2.41197 9.24918 -0.000194030802054 801
9.16117 2.41199 9.74918 -0.000153475651239 802
9.71118 2.412 10.29918 -0.000116388761691 803
10.26118 2.412 10.84918 -8.71455781865e-05 804
10.81118 2.412 11.39918 -6.46997520256e-05 805
1.732 11.4138 10.3182 -0.00021749925509 807
1.732 11.02489 10.70711 -0.000164427166353 808
1.732 10.63598 11.09602 -0.000132291158849 809
1.732 10.24708 11.48492 -0.000131552434851 810
11.10058 12.01958 3.081 1.36279838191e-05 811
10.55058 11.46958 3.081 1.36017320064e-05 812
10.00057 10.91958 3.08099 1.47617114835e-05 813
9.50056 10.41958 3.08098 1.76893569568e-05 814
9.00052 9.91958 3.08094 2.41432291138e-05 815
8.50043 9.41958 3.08085 3.7661504096e-05 816
8.00019 8.91958 3.08061 6.51469459982e-05 817
7.49961 8.41958 3.08003 0.000121151017129 818
6.94797 7.86959 3.07838 0.00026138684056 819
6.44428 7.3696 3.07468 0.000575985455411 820
5.88461 6.81969 3.06492 0.00149559314234 821
5.31285 6.27016 3.04269 0.00411879013026 822
4.72185 5.72187 2.99998 0.0116546102398 823
4.17227 5.22461 2.94766 0.029378753227 824
3.5985 4.67565 2.92285 0.0722695898782 825
3.17028 4.13895 3.03133 0.137921665607 826
2.95135 3.65724 3.29411 0.19378468469 827
2.85873 3.26055 3.59818 0.180046027731 828
2.83576 2.8606 3.97516 0.149996061996 829
5.50497 2.40495 7.10002 0.000879182816225 830
6.05912 2.40912 7.65 3.80852852151e-05 831
6.56078 2.41078 8.15 -0.000181693129803 832
7.0615 2.4115 8.65 -0.000223456754174 833
7.5618 2.4118 9.15 -0.000205303399783 834
8.06192 2.41192 9.65 -0.000172723659725 835
8.56197 2.41197 10.15 -0.000139823163044 836
9.06199 2.41199 10.65 -0.000110514852338 837
9.612 2.412 11.2 -8.40682978117e-05 838
10.162 2.412 11.75 -6.34366129319e-05 839
11.131 12.05 3.081 1.36516260414e-05 840
10.581 11.5 3.081 1.35786649341e-05 841
10.08099 11.0 3.08099 1.44872529461e-05 842
9.58098 10.5 3.08098 1.70421391099e-05 843
9.08095 10.0 3.08095 2.27500079267e-05 844
8.58087 9.5 3.08087 3.47836850163e-05 845
8.08066 9.0 3.08066 5.93248671734e-05 846
7.58016 8.5 3.08016 0.000109142971893 847
7.07893 8.0 3.07893 0.000215823891401 848
6.52552 7.45001 3.07551 0.000504412121962 849
5.96701 6.90008 3.06693 0.00129514704826 850
5.39752 6.35046 3.04706 0.00354268993973 851
4.86385 5.85171 3.01214 0.00910532044869 852
4.31551 5.35432 2.96119 0.0232127458949 853
3.72672 4.80604 2.92068 0.0594504893154 854
3.28669 4.31061 2.97608 0.115396187495 855
3.00471 3.80865 3.19606 0.181629227536 856
2.87674 3.36133 3.51541 0.187394977951 857
2.83135 2.95058 3.88077 0.156353262313 858
5.8777 2.40811 7.46959 0.00021061142201 859
6.37992 2.41033 7.96959 -0.000132991591601 860
6.93094 2.41136 8.51958 -0.000221365272755 861
7.43132 2.41174 9.01958 -0.000212481587754 862
7.93148 2.4119 9.51958 -0.00018153212526 863
8.43154 2.41196 10.01958 -0.000148123489092 864
8.93156 2.41198 10.51958 -0.000117674989191 865
9.43157 2.41199 11.01958 -9.20439049174e-05 866
9.93158 2.412 11.51958 -7.15255589136e-05 867
10.631 12.55 3.081 1.26239691662e-05 868
10.13099 12.05 3.08099 1.20325875924e-05 869
9.63098 11.55 3.08098 1.22772059749e-05 870
9.13096 11.05 3.08096 1.42887674517e-05 871
8.63089 10.55 3.08089 1.9909136897e-05 872
8.13073 10.05 3.08073 3.27454408129e-05 873
7.63033 9.55 3.08033 6.02725020238e-05 874
7.12932 9.05 3.07932 0.000120711401389 875
6.57649 8.50001 3.07648 0.000285322335595 876
6.07012 8.00005 3.07007 0.000671909580244 877
5.50325 7.45034 3.05291 0.00185043333673 878
4.96918 6.95165 3.01753 0.00494201282242 879
4.40468 6.45665 2.94803 0.0137317388436 880
3.8063 5.96923 2.83707 0.0401439640213 881
3.20116 5.48388 2.71728 0.0915817111104 882
2.63911 4.93755 2.70156 0.181541504944 883
2.36683 4.47725 2.88958 0.238866640405 884
2.25845 4.03834 3.22011 0.240532566839 885
2.21752 3.62953 3.58799 0.19765088923 886
1.92609 4.57628 3.34981 0.189202761659 899
1.7317 6.84393 5.88777 0.000850311001161 901
1.73187 6.45511 6.27676 0.000813015776155 902
1.73176 6.1015 6.63026 0.00160735197361 903
1.7313 5.71236 7.01894 0.00326059306691 904
1.73174 7.37903 6.35271 -0.000360329427237 906
1.73183 6.99017 6.74166 -0.000218058351101 907
1.7318 6.6366 7.0952 0.000170696562149 908
1.73165 6.28297 7.44868 0.000746721060248 909
1.73187 7.84358 6.88829 -0.000659988397048 911
1.7319 7.49004 7.24186 -0.000482141976149 912
1.73189 7.13648 7.59541 -0.000265447084059 913
1.73182 6.74754 7.98428 -1.07255051767e-05 914
1.73194 8.37889 7.35305 -0.000668769721244 916
1.73195 8.02534 7.70661 -0.000516883898378 917
1.73195 7.63643 8.09552 -0.000365057009418 918
1.73192 7.24751 8.48441 -0.000266843965419 919
1.73198 8.84352 7.88846 -0.000574920787041 921
1.73199 8.48997 8.24202 -0.000445719187101 922
1.73198 8.13641 8.59557 -0.000350377511294 923
1.73197 7.78285 8.94912 -0.000311623627322 924
1.73199 9.37886 8.35313 -0.000491662815685 926
1.732 8.98996 8.74204 -0.000375307042232 927
1.73199 8.6364 9.09559 -0.000303199612582 928
1.73199 8.24749 9.4845 -0.000285435826976 929
1.732 9.87886 8.85314 -0.000403823316314 931
1.73199 9.48995 9.24204 -0.000308175841231 932
1.732 9.1364 9.5956 -0.000251752109261 933
1.73199 8.78284 9.94915 -0.000241817665871 934
1.73199 10.3435 9.38849 -0.000320542103942 936
1.732 9.98995 9.74205 -0.000249676490636 937
1.732 9.60104 10.13096 -0.000202684908284 938
1.732 9.21213 10.51987 -0.000202200324627 939
1.732 10.8435 9.8885 -0.000258392659697 941
1.73199 10.45459 10.2774 -0.000195799162938 942
1.732 10.10104 10.63096 -0.000163472342118 943
1.732 9.71213 11.01987 -0.000164432419932 944
13.40294 10.02195 3.38099 1.97506197274e-05 945
12.90292 9.52195 3.38097 2.39426198873e-05 946
12.40287 9.02195 3.38092 3.20705707298e-05 947
11.90275 8.52195 3.3808 4.80173138684e-05 948
11.40245 8.02195 3.3805 8.31269566521e-05 949
10.90171 7.52195 3.37976 0.000169723030161 950
10.34967 6.97196 3.37771 0.00043174366372 951
9.84515 6.47198 3.37317 0.00107114712302 952
9.33496 5.97209 3.36287 0.00260985356922 953
8.81355 5.47259 3.34096 0.0062501469598 954
8.27343 4.9744 3.29903 0.0141584694127 955
7.6523 4.42984 3.22246 0.0314201547682 956
7.07044 3.93802 3.13242 0.0582734683799 957
6.50201 3.44376 3.05825 0.0961638885565 958
6.04873 2.90873 3.14 0.133064457546 959
6.20605 2.653 3.55305 0.105649068018 960
7.71859 2.61854 5.10005 0.00929670236553 961
8.27472 2.62471 5.65001 0.00295257474989 962
8.82777 2.62777 6.2 0.000841010133955 963
9.32903 2.62903 6.7 0.00019704689176 964
9.82959 2.62959 7.2 -2.85822901697e-05 965
10.32983 2.62983 7.7 -0.000101785418446 966
10.82993 2.62993 8.2 -0.000115889591837 967
11.32997 2.62997 8.7 -0.000106318292723 968
11.82999 2.62999 9.2 -8.84395843803e-05 969
12.38 2.63 9.75 -6.76543058061e-05 970
13.40294 10.02195 3.38099 1.97506197274e-05 971
12.90292 9.52195 3.38097 2.39426198873e-05 972
12.40287 9.02195 3.38092 3.20705707298e-05 973
11.90275 8.52195 3.3808 4.80173138684e-05 974
11.40245 8.02195 3.3805 8.31269566521e-05 975
10.90171 7.52195 3.37976 0.000169723030161 976
10.34967 6.97196 3.37771 0.00043174366372 977
9.84515 6.47198 3.37317 0.00107114712302 978
9.33496 5.97209 3.36287 0.00260985356922 979
8.81355 5.47259 3.34096 0.0062501469598 980
8.27343 4.9744 3.29903 0.0141584694127 981
7.6523 4.42984 3.22246 0.0314201547682 982
7.07044 3.93802 3.13242 0.0582734683799 983
6.50201 3.44376 3.05825 0.0961638885565 984
6.04873 2.90873 3.14 0.133064457546 985
6.20605 2.653 3.55305 0.105649068018 986
7.71859 2.61854 5.10005 0.00929670236553 987
8.27472 2.62471 5.65001 0.00295257474989 988
8.82777 2.62777 6.2 0.000841010133955 989
9.32903 2.62903 6.7 0.00019704689176 990
9.82959 2.62959 7.2 -2.85822901697e-05 991
10.32983 2.62983 7.7 -0.000101785418446 992
10.82993 2.62993 8.2 -0.000115889591837 993
11.32997 2.62997 8.7 -0.000106318292723 994
11.82999 2.62999 9.2 -8.84395843803e-05 995
12.37999 2.62999 9.75 -6.76540497351e-05 996
13.43099 10.05 3.38099 1.959886745e-05 997
12.93097 9.55 3.38097 2.36227850676e-05 998
12.43093 9.05 3.38093 3.1463481074e-05 999
11.93082 8.55 3.38082 4.67791160265e-05 1000
11.43052 8.05 3.38052 8.02534600901e-05 1001
10.92982 7.55 3.37982 0.000162403895897 1002
10.42814 7.05 3.37814 0.000375838555922 1003
9.87356 6.50002 3.37354 0.00101756169628 1004
9.31235 5.95015 3.3622 0.00271555248804 1005
8.79028 5.45068 3.3396 0.00648899376042 1006
8.24918 4.95258 3.2966 0.0146485485826 1007
7.62698 4.4082 3.21878 0.032356691559 1008
7.04485 3.91643 3.12842 0.0597235951689 1009
6.47843 3.42187 3.05656 0.0979939049064 1010
6.04202 2.89021 3.15181 0.133382542812 1011
6.22301 2.64847 3.57454 0.103460767532 1012
7.74086 2.61886 5.122 0.00889654997592 1013
8.24645 2.62448 5.62197 0.00313824904727 1014
8.79962 2.62766 6.17196 0.000900933403329 1015
9.35101 2.62906 6.72195 0.000181373568262 1016
9.85155 2.6296 7.22195 -3.39553186768e-05 1017
10.35179 2.62984 7.72195 -0.000103265613873 1018
10.85188 2.62993 8.22195 -0.000115809793453 1019
11.35192 2.62997 8.72195 -0.000105634543037 1020
11.85194 2.62999 9.22195 -8.75959040548e-05 1021
12.35195 2.63 9.72195 -6.86700745367e-05 1022
12.88499 10.50399 3.381 2.00822161381e-05 1023
12.38498 10.00399 3.38099 2.27182539084e-05 1024
11.88496 9.50399 3.38097 2.8554229491e-05 1025
11.38491 9.00399 3.38092 4.08570019326e-05 1026
10.88478 8.50399 3.38079 6.59093166457e-05 1027
10.38447 8.00399 3.38048 0.000118998081716 1028
9.8837 7.50399 3.37971 0.000241322410992 1029
9.38185 7.00399 3.37786 0.000540298453053 1030
8.82686 6.45402 3.37284 0.00140170324823 1031
8.26472 5.90416 3.36056 0.00367153427588 1032
7.74122 5.40476 3.33646 0.00920721248095 1033
7.14337 4.85712 3.28625 0.0205608999667 1034
6.52196 4.31255 3.20941 0.0434158305107 1035
5.95658 3.81758 3.139 0.0781749969523 1036
5.41511 3.26972 3.14539 0.118754389558 1037
5.23985 2.84747 3.39238 0.105157074 1038
7.62689 2.62689 6.0 0.000405337951254 1039
8.12859 2.62859 6.5 -0.000229699271255 1040
8.62939 2.62939 7.0 -0.000370589310344 1041
9.12974 2.62974 7.5 -0.000360520726022 1042
9.62989 2.62989 8.0 -0.000309804237509 1043
10.12996 2.62996 8.5 -0.0002522564566 1044
10.62998 2.62998 9.0 -0.000198725982194 1045
11.12999 2.62999 9.5 -0.000153150726163 1046
11.63 2.63 10.0 -0.000116025907643 1047
12.18 2.63 10.55 -8.41066597172e-05 1048
12.931 10.55 3.381 1.99373253109e-05 1049
12.43099 10.05 3.38099 2.2381556773e-05 1050
11.93097 9.55 3.38097 2.78037200549e-05 1051
11.43093 9.05 3.38093 3.9326892467e-05 1052
10.93081 8.55 3.38081 6.27782737672e-05 1053
10.43052 8.05 3.38052 0.000112154295345 1054
9.92981 7.55 3.37981 0.000225072804295 1055
9.4281 7.05 3.3781 0.000500060252999 1056
8.87348 6.50002 3.37346 0.0012926198851 1057
8.31218 5.95015 3.36203 0.00339055267203 1058
7.7901 5.45068 3.33942 0.00862309056816 1059
7.1944 4.90283 3.29157 0.0192416631063 1060
6.57449 4.35802 3.21647 0.0409278840794 1061
5.9522 3.81362 3.13858 0.0785072119899 1062
5.4523 3.31501 3.13729 0.11759216206 1063
5.23422 2.87707 3.35715 0.109059816031 1064
7.5304 2.62641 5.90399 0.000647100909892 1065
8.03234 2.62835 6.40399 -0.000163687983352 1066
8.53327 2.62928 6.90399 -0.000361087495013 1067
9.03369 2.6297 7.40399 -0.000367396893326 1068
9.53386 2.62987 7.90399 -0.000320635371304 1069
10.03394 2.62995 8.40399 -0.000263211819515 1070
10.53397 2.62998 8.90399 -0.000208441156943 1071
11.03398 2.62999 9.40399 -0.000161236978457 1072
11.53399 2.63 9.90399 -0.000122516380247 1073
12.08399 2.63 10.45399 -8.90727943053e-05 1074
12.39405 11.01305 3.381 2.00396407451e-05 1075
11.84405 10.46305 3.381 2.13186600081e-05 1076
11.34404 9.96305 3.38099 2.4598977833e-05 1077
10.84402 9.46305 3.38097 3.17249027371e-05 1078
10.34396 8.96305 3.38091 4.65386892704e-05 1079
9.84381 8.46305 3.38076 7.64093850674e-05 1080
9.34345 7.96305 3.3804 0.000139796436112 1081
8.84256 7.46305 3.37951 0.000283342312286 1082
8.29012 6.91306 3.37706 0.000684371058622 1083
7.78476 6.41309 3.37167 0.00161274051554 1084
7.22124 5.86327 3.35797 0.00417032370983 1085
6.69614 5.36395 3.33219 0.00959926699169 1086
6.09967 4.81615 3.28352 0.0234129058851 1087
5.54965 4.31895 3.2307 0.0456803796779 1088
5.03269 3.81968 3.21301 0.0835485652149 1089
4.62229 3.28706 3.33523 0.113651032943 1090
4.56907 2.87741 3.69166 0.0779171257261 1091
6.8775 2.6275 6.25 -7.01311443183e-05 1092
7.37883 2.62883 6.75 -0.000390101146819 1093
7.87949 2.62949 7.25 -0.000425291012481 1094
8.37979 2.62979 7.75 -0.000379719671988 1095
8.87991 2.62991 8.25 -0.000315991062912 1096
9.37997 2.62997 8.75 -0.000253033056791 1097
9.87999 2.62999 9.25 -0.000197623291681 1098
10.42999 2.62999 9.8 -0.000147559296773 1099
10.93 2.63 10.3 -0.000111505102284 1100
11.48 2.63 10.85 -8.07555091597e-05 1101
12.431 11.05 3.381 2.0009413319e-05 1102
11.88099 10.5 3.38099 2.11721980523e-05 1103
11.33099 9.95 3.38099 2.47241011188e-05 1104
10.83096 9.45 3.38096 3.19905617769e-05 1105
10.33091 8.95 3.38091 4.70834393602e-05 1106
9.83075 8.45 3.38075 7.7524274548e-05 1107
9.33038 7.95 3.38038 0.000142211817589 1108
8.82948 7.45 3.37948 0.000289001592493 1109
8.27698 6.90001 3.37697 0.000699530633788 1110
7.7715 6.40004 3.37146 0.001649677621 1111
7.25947 5.90019 3.35928 0.00391526292194 1112
6.68223 5.35094 3.33129 0.00980409850313 1113
6.14027 4.85289 3.28738 0.0222757764546 1114
5.58991 4.35573 3.23418 0.0435432262832 1115
5.02036 3.80665 3.21371 0.0847583220947 1116
4.55926 2.89817 3.66109 0.080952708741 1118
6.8906 2.62755 6.26305 -8.57428719919e-05 1119
7.3919 2.62885 6.76305 -0.000393219737366 1120
7.89255 2.6295 7.26305 -0.00042468273049 1121
8.39284 2.62979 7.76305 -0.000378154190238 1122
8.89297 2.62992 8.26305 -0.000314293380047 1123
9.39302 2.62997 8.76305 -0.000251474932403 1124
9.89304 2.62999 9.26305 -0.000196302729439 1125
10.39305 2.63 9.76305 -0.000150571272145 1126
10.94305 2.63 10.31305 -0.000110673943651 1127
11.49305 2.63 10.86305 -8.01252761669e-05 1128
12.39405 11.01305 3.381 2.00396407451e-05 1129
11.84405 10.46305 3.381 2.13186600081e-05 1130
11.34404 9.96305 3.38099 2.4598977833e-05 1131
10.84402 9.46305 3.38097 3.17249027371e-05 1132
10.34396 8.96305 3.38091 4.65386892704e-05 1133
9.84381 8.46305 3.38076 7.64093850674e-05 1134
9.34345 7.96305 3.3804 0.000139796436112 1135
8.84256 7.46305 3.37951 0.000283342312286 1136
8.29012 6.91306 3.37706 0.000684371058622 1137
7.78476 6.41309 3.37167 0.00161274051554 1138
7.22124 5.86327 3.35797 0.00417032370983 1139
6.69614 5.36395 3.33219 0.00959926699169 1140
6.09967 4.81615 3.28352 0.0234129058851 1141
5.54965 4.31895 3.2307 0.0456803796779 1142
5.03269 3.81968 3.21301 0.0835485652149 1143
4.62229 3.28706 3.33523 0.113651032942 1144
4.56907 2.87741 3.69166 0.0779171257261 1145
6.8775 2.6275 6.25 -7.01311443183e-05 1146
7.37883 2.62883 6.75 -0.000390101146819 1147
7.87949 2.62949 7.25 -0.000425291012481 1148
8.37979 2.62979 7.75 -0.000379719671988 1149
8.87991 2.62991 8.25 -0.000315991062912 1150
9.37997 2.62997 8.75 -0.000253033101811 1151
9.87999 2.62999 9.25 -0.000197623291681 1152
10.42999 2.62999 9.8 -0.000147559296773 1153
10.93 2.63 10.3 -0.000111505102284 1154
11.48 2.63 10.85 -8.07555091597e-05 1155
11.90924 11.52824 3.381 2.0105655122e-05 1156
11.35924 10.97824 3.381 2.03780339803e-05 1157
10.85923 10.47824 3.38099 2.18049362697e-05 1158
10.35922 9.97824 3.38098 2.50983953495e-05 1159
9.8592 9.47824 3.38096 3.23940020183e-05 1160
9.35911 8.97824 3.38087 4.77495284168e-05 1161
8.85891 8.47824 3.38067 7.93762674114e-05 1162
8.35842 7.97824 3.38018 0.000145870126283 1163
7.80703 7.42825 3.37878 0.000316585406862 1164
7.30391 6.92826 3.37565 0.000700834477055 1165
6.79682 6.42831 3.36851 0.0016456737324 1166
6.2298 5.87859 3.35121 0.0042801769542 1167
5.64783 5.32961 3.31822 0.01083643722 1168
5.11048 4.83112 3.27936 0.0251487940077 1169
4.55017 4.28162 3.26855 0.0547322512835 1170
4.12068 3.74431 3.37637 0.099483169059 1171
3.91774 3.30535 3.61239 0.103414676123 1172
3.91398 2.9513 3.96268 0.0735811931624 1173
6.22672 2.62672 6.6 -1.0935952991e-05 1174
6.72847 2.62847 7.1 -0.000299219084673 1175
7.22933 2.62933 7.6 -0.000346980640049 1176
7.72972 2.62972 8.1 -0.000316752006371 1177
8.22989 2.62989 8.6 -0.000265511539915 1178
8.72996 2.62996 9.1 -0.000213313338552 1179
9.22998 2.62998 9.6 -0.000167080084306 1180
9.72999 2.62999 10.1 -0.000128570294513 1181
10.23 2.63 10.6 -9.75519228222e-05 1182
10.78 2.63 11.15 -7.09647026525e-05 1183
11.931 11.55 3.381 2.01136300493e-05 1184
11.381 11.0 3.381 2.03428897201e-05 1185
10.88099 10.5 3.38099 2.17161083264e-05 1186
10.38098 10.0 3.38098 2.48916268273e-05 1187
9.88095 9.5 3.38095 3.19481893582e-05 1188
9.38088 9.0 3.38088 4.68253835076e-05 1189
8.88069 8.5 3.38069 7.74671144583e-05 1190
8.38022 8.0 3.38022 0.000141788488227 1191
7.87905 7.5 3.37905 0.00028438406131 1192
7.32586 6.95001 3.37585 0.000675975843244 1193
6.81901 6.45006 3.36895 0.00158466024434 1194
6.25249 5.90033 3.35216 0.00412246855853 1195
5.72463 5.40117 3.32346 0.00962503636961 1196
5.13372 4.85282 3.2809 0.0243631302182 1197
4.57067 4.30334 3.26733 0.0531575798022 1198
4.13379 3.76478 3.36901 0.0980375296672 1199
3.91194 3.28269 3.62925 0.101926099253 1200
3.92053 2.93487 3.98566 0.071700900137 1201
6.20487 2.62662 6.57825 1.23390349465e-05 1202
6.75677 2.62853 7.12824 -0.000305972279404 1203
7.2576 2.62936 7.62824 -0.000346534174152 1204
7.75798 2.62974 8.12824 -0.00031412803538 1205
8.25813 2.62989 8.62824 -0.000262474113381 1206
8.7582 2.62996 9.12824 -0.000210511639218 1207
9.25822 2.62998 9.62824 -0.00016469609387 1208
9.75823 2.62999 10.12824 -0.000126625918867 1209
10.25824 2.63 10.62824 -9.60059699135e-05 1210
10.80824 2.63 11.17824 -6.978675116e-05 1211
11.93101 11.55 3.38101 2.01141864675e-05 1212
11.431 11.05 3.381 2.02731478877e-05 1213
10.881 10.5 3.381 2.17165298106e-05 1214
10.38099 10.0 3.38099 2.48919548995e-05 1215
9.88096 9.5 3.38096 3.19486609899e-05 1216
9.38088 9.0 3.38088 4.68253835076e-05 1217
8.88068 8.5 3.38068 7.74665773901e-05 1218
8.38021 8.0 3.38021 0.000141788286084 1219
7.87905 7.5 3.37905 0.00028438406131 1220
7.32586 6.95001 3.37585 0.000675975843244 1221
6.81901 6.45006 3.36895 0.00158466024434 1222
6.25249 5.90033 3.35216 0.00412246855853 1223
5.72463 5.40117 3.32346 0.00962503636961 1224
5.13372 4.85282 3.2809 0.0243631302182 1225
4.57067 4.30334 3.26733 0.0531575798022 1226
4.13379 3.76478 3.36901 0.0980375296672 1227
3.91194 3.28269 3.62925 0.101926099253 1228
3.92053 2.93487 3.98566 0.0717008955409 1229
6.20487 2.62662 6.57825 1.23390349465e-05 1230
6.75677 2.62853 7.12824 -0.000305972279404 1231
7.2576 2.62936 7.62824 -0.000346534174152 1232
7.75798 2.62974 8.12824 -0.00031412803538 1233
8.25813 2.62989 8.62824 -0.000262474113381 1234
8.7582 2.62996 9.12824 -0.000210511639218 1235
9.25822 2.62998 9.62824 -0.00016469609387 1236
9.75823 2.62999 10.12824 -0.000126625918867 1237
10.25824 2.63 10.62824 -9.60059699135e-05 1238
10.80824 2.63 11.17824 -6.978675116e-05 1239
11.90924 11.52824 3.381 2.0105655122e-05 1240
11.35924 10.97824 3.381 2.03780339803e-05 1241
10.85923 10.47824 3.38099 2.18049362697e-05 1242
10.35922 9.97824 3.38098 2.50983953495e-05 1243
9.8592 9.47824 3.38096 3.23940020183e-05 1244
9.35911 8.97824 3.38087 4.77495284168e-05 1245
8.85891 8.47824 3.38067 7.93762674114e-05 1246
8.35842 7.97824 3.38018 0.000145870126283 1247
7.80703 7.42825 3.37878 0.000316585406862 1248
7.30391 6.92826 3.37565 0.000700834477055 1249
6.79682 6.42831 3.36851 0.0016456737324 1250
6.2298 5.87859 3.35121 0.0042801769542 1251
5.64783 5.32961 3.31822 0.01083643722 1252
5.11048 4.83112 3.27936 0.0251487940077 1253
4.55017 4.28162 3.26855 0.0547322512835 1254
4.12068 3.74431 3.37637 0.099483169059 1255
3.91774 3.30535 3.61239 0.103414676123 1256
3.91398 2.9513 3.96268 0.0735811931624 1257
6.22672 2.62672 6.6 -1.0935952991e-05 1258
6.72847 2.62847 7.1 -0.000299219084673 1259
7.22933 2.62933 7.6 -0.000346980640049 1260
7.72972 2.62972 8.1 -0.000316752006371 1261
8.22989 2.62989 8.6 -0.000265511539915 1262
8.72996 2.62996 9.1 -0.000213313338552 1263
9.22998 2.62998 9.6 -0.000167080084306 1264
9.72999 2.62999 10.1 -0.000128570294513 1265
10.23 2.63 10.6 -9.75519228222e-05 1266
10.78 2.63 11.15 -7.09647026525e-05 1267
2.361 12.0428 10.3182 -0.000256730053057 1269
2.361 11.65389 10.70711 -0.000211065820208 1270
2.361 11.26498 11.09602 -0.000170706307592 1271
2.36099 10.87607 11.48492 -0.000147640275678 1272
2.361 10.52252 11.83848 -0.000145789701353 1273
2.361 10.13361 12.22739 -0.000166147513712 1274
11.39873 12.01772 3.38101 1.98122977097e-05 1275
10.89872 11.51772 3.381 1.94145290101e-05 1276
10.34872 10.96772 3.381 1.99432931454e-05 1277
9.8487 10.46772 3.38098 2.18762720693e-05 1278
9.34866 9.96772 3.38094 2.64358649024e-05 1279
8.84857 9.46772 3.38085 3.63361056296e-05 1280
8.34835 8.96772 3.38063 5.68732137298e-05 1281
7.84778 8.46772 3.38006 9.8711555012e-05 1282
7.3464 7.96772 3.37868 0.000187903678746 1283
6.7926 7.41774 3.37486 0.000426947599813 1284
6.28437 6.91781 3.36656 0.000986473282203 1285
5.71423 6.36822 3.34601 0.00264355690361 1286
5.17921 5.86957 3.30964 0.0066567652026 1287
4.57428 5.32265 3.25163 0.0183465769902 1288
4.04444 4.8239 3.22054 0.0432476820012 1289
3.59269 4.28354 3.30915 0.0933971498255 1290
3.3678 3.83675 3.53105 0.130659271844 1291
3.25304 3.395 3.85804 0.116132366945 1292
3.24691 3.00353 4.24338 0.0942042456836 1293
5.92522 2.62521 7.30001 0.00014697054006 1294
6.47807 2.62807 7.85 -0.000188872575456 1295
6.97919 2.62919 8.35 -0.000248152474478 1296
7.47967 2.62967 8.85 -0.000231237679123 1297
7.97987 2.62987 9.35 -0.00019445458461 1298
8.47995 2.62995 9.85 -0.000156487080783 1299
8.97998 2.62998 10.35 -0.000122643180178 1300
9.47999 2.62999 10.85 -9.44610882161e-05 1301
9.98 2.63 11.35 -7.20202457601e-05 1302
10.53 2.63 11.9 -5.27858613838e-05 1303
11.431 12.05 3.381 1.98558166719e-05 1304
10.881 11.5 3.381 1.9412930002e-05 1305
10.38099 11.0 3.38099 1.9873613451e-05 1306
9.88098 10.5 3.38098 2.16920346329e-05 1307
9.38095 10.0 3.38095 2.60213940077e-05 1308
8.88086 9.5 3.38086 3.54514887706e-05 1309
8.38065 9.0 3.38065 5.50635419322e-05 1310
7.88011 8.5 3.38011 9.5002539174e-05 1311
7.37882 8.0 3.37882 0.000179719102654 1312
6.87569 7.50001 3.37568 0.00037488300006 1313
6.3174 6.95008 3.36732 0.000932612299893 1314
5.74815 6.40045 3.3477 0.00249220310393 1315
5.15991 5.85193 3.30798 0.00687958178811 1316
4.60981 5.35474 3.25507 0.0173052198041 1317
4.07656 4.85618 3.22038 0.0410782491337 1318
3.64642 4.362 3.28442 0.0891665161793 1319
3.37798 3.86409 3.51389 0.129465138187 1320
3.25711 3.41977 3.83734 0.117367286645 1321
3.23836 3.05728 4.18108 0.0976495682897 1322
5.79184 2.6241 7.16774 0.000318259300724 1323
6.29511 2.62738 7.66773 -0.000124455324383 1324
6.8467 2.62898 8.21772 -0.000243638524004 1325
7.3473 2.62958 8.71772 -0.000238998167852 1326
7.84755 2.62983 9.21772 -0.000204698903646 1327
8.34765 2.62993 9.71772 -0.000166261947234 1328
8.84769 2.62997 10.21772 -0.00013107510331 1329
9.34771 2.62999 10.71772 -0.000101382655739 1330
9.84772 2.63 11.21772 -7.74046509931e-05 1331
10.39772 2.63 11.76772 -5.69520457877e-05 1332
10.91773 12.53672 3.38101 1.9265820554e-05 1333
10.41772 12.03672 3.381 1.84659223867e-05 1334
9.91771 11.53672 3.38099 1.81945690215e-05 1335
9.41768 11.03672 3.38096 1.92253389886e-05 1336
8.91762 10.53672 3.3809 2.29183859862e-05 1337
8.41746 10.03672 3.38074 3.18042040472e-05 1338
7.91706 9.53672 3.38034 5.06283695176e-05 1339
7.41607 9.03672 3.37935 9.10119728444e-05 1340
6.91368 8.53672 3.37696 0.000182805465122 1341
6.35715 7.98677 3.37038 0.000442597569011 1342
5.84309 7.48698 3.35611 0.00107424228009 1343
5.25874 6.93819 3.32055 0.00308483789274 1344
4.64134 6.39312 3.24822 0.00946847552752 1345
3.99418 5.85383 3.14035 0.0288459686194 1346
3.43393 5.35885 3.07508 0.0734470422488 1347
3.03642 4.87064 3.16578 0.122403046857 1348
2.84738 4.40001 3.44737 0.154591931939 1349
2.77598 3.97713 3.79885 0.130758167371 1350
2.7365 3.60439 4.13211 0.114328679497 1351
2.71067 3.20281 4.50786 0.111815132129 1352
5.52065 2.62061 7.90004 0.00068414361244 1353
6.07627 2.62626 8.45001 -4.14880270921e-06 1354
6.62856 2.62856 9.0 -0.000182774821572 1355
7.12941 2.62941 9.5 -0.000200233531003 1356
7.62976 2.62976 10.0 -0.00017551019951 1357
8.1299 2.6299 10.5 -0.000144086681534 1358
8.62996 2.62996 11.0 -0.000114736876668 1359
9.12998 2.62998 11.5 -8.94761558197e-05 1360
9.62999 2.62999 12.0 -6.88886669414e-05 1361
10.13 2.63 12.5 -5.27484272485e-05 1362
10.931 12.55 3.381 1.92911255078e-05 1363
10.43099 12.05 3.38099 1.84847674007e-05 1364
9.93098 11.55 3.38098 1.81886675734e-05 1365
9.43096 11.05 3.38096 1.91711670071e-05 1366
8.9309 10.55 3.3809 2.27677513083e-05 1367
8.43074 10.05 3.38074 3.1468485172e-05 1368
7.93035 9.55 3.38035 4.99279361741e-05 1369
7.42939 9.05 3.37939 8.95490447112e-05 1370
6.8767 8.50001 3.37669 0.000193242771464 1371
6.31975 7.95006 3.36969 0.000471227177707 1372
5.80484 7.4503 3.35454 0.00114968199665 1373
5.2732 6.95142 3.32178 0.00300442996912 1374
4.71429 6.45551 3.25878 0.00830759322625 1375
4.06892 5.91581 3.15311 0.0255003392507 1376
3.49931 5.42209 3.07722 0.0680689967988 1377
3.04383 4.88298 3.16085 0.121187229985 1378
2.86041 4.4508 3.40961 0.153992853708 1379
2.78684 4.06248 3.72436 0.136568883413 1380
2.74096 3.65131 4.08965 0.115574733454 1381
2.71167 3.24806 4.46361 0.111281308196 1382
5.60859 2.62185 7.98674 0.000511391331066 1383
6.11321 2.62649 8.48672 -2.57891981996e-05 1384
6.61524 2.62852 8.98672 -0.000181093667558 1385
7.11611 2.62939 9.48672 -0.000200560662997 1386
7.61647 2.62975 9.98672 -0.000176344172556 1387
8.11662 2.6299 10.48672 -0.000144908621264 1388
8.61668 2.62996 10.98672 -0.000115464917973 1389
9.1167 2.62998 11.48672 -9.00879022268e-05 1390
9.61671 2.62999 11.98672 -6.93747938339e-05 1391
10.11672 2.63 12.48672 -5.31271796944e-05 1392
10.931 12.55 3.381 1.92911255078e-05 1393
10.381 12.0 3.381 1.84158925075e-05 1394
9.88099 11.5 3.38099 1.82146711464e-05 1395
9.38096 11.0 3.38096 1.93834300764e-05 1396
8.88089 10.5 3.38089 2.33531042223e-05 1397
8.38071 10.0 3.38071 3.27672607115e-05 1398
7.88029 9.5 3.38029 5.26414948435e-05 1399
7.37923 9.0 3.37923 9.53960823581e-05 1400
6.8263 8.45001 3.37629 0.000208597880549 1401
6.26874 7.90007 3.36867 0.000513550965435 1402
5.7526 7.40035 3.35225 0.00126177603142 1403
5.21868 6.90164 3.31704 0.00331911747316 1404
4.59879 6.35696 3.24183 0.010215403488 1405
4.00984 5.86684 3.143 0.0281143095446 1406
3.39718 5.32213 3.07505 0.0767750619901 1407
2.99216 4.79133 3.20083 0.129296115501 1408
2.8318 4.3314 3.5004 0.15244854221 1409
2.76832 3.9121 3.85622 0.126778378568 1410
2.73068 3.54023 4.19045 0.112925053738 1411
2.71071 3.14151 4.5692 0.112696190808 1412
5.15007 2.61324 7.53683 0.00190444626143 1413
5.70984 2.6231 8.08674 0.000349826387567 1414
6.26401 2.62729 8.63672 -9.62268544663e-05 1415
6.76559 2.62887 9.13672 -0.000195448396779 1416
7.26625 2.62953 9.63672 -0.000195477408041 1417
7.76653 2.62981 10.13672 -0.000166911500242 1418
8.26664 2.62992 10.63672 -0.000135649479946 1419
8.76669 2.62997 11.13672 -0.000107389480742 1420
9.26671 2.62999 11.63672 -8.3374915105e-05 1421
9.76672 2.63 12.13672 -6.40614337932e-05 1422
10.43099 13.05 3.38099 1.78741393822e-05 1423
9.88098 12.5 3.38098 1.66173500337e-05 1424
9.38096 12.0 3.38096 1.6254227407e-05 1425
8.8809 11.5 3.3809 1.77000028691e-05 1426
8.38073 11.0 3.38073 2.29476169478e-05 1427
7.88032 10.5 3.38032 3.62132876174e-05 1428
7.37931 10.0 3.37931 6.62472224697e-05 1429
6.82648 9.45001 3.37647 0.000152415083206 1430
6.32013 8.95005 3.37008 0.000361610015486 1431
5.75331 8.40034 3.35297 0.00100985512024 1432
5.21902 7.90167 3.31735 0.00273879148067 1433
4.59384 7.35797 3.23587 0.00920282996477 1434
2.59957 5.37243 3.22714 0.151785317326 1437
2.52742 4.94936 3.57806 0.127734091438 1438
2.508 4.58624 3.92176 0.0947226413998 1439
2.49403 4.19041 4.30362 0.0779207278106 1440
2.47541 3.82767 4.64774 0.0804719447941 1441
10.43099 13.05 3.38099 1.78741393822e-05 1442
9.88099 12.5 3.38099 1.661765534e-05 1443
9.38096 12.0 3.38096 1.6254227407e-05 1444
8.88089 11.5 3.38089 1.76996224917e-05 1445
8.38072 11.0 3.38072 2.2947256268e-05 1446
7.88031 10.5 3.38031 3.62133678039e-05 1447
7.3793 10.0 3.3793 6.62475851623e-05 1448
6.82648 9.45001 3.37647 0.000152415083206 1449
6.32013 8.95005 3.37008 0.000361610015486 1450
5.75331 8.40034 3.35297 0.00100985512024 1451
5.21902 7.90167 3.31735 0.00273879148067 1452
4.59384 7.35797 3.23587 0.00920282996477 1453
2.39934 5.57836 3.82098 0.0856049343207 1456
2.35893 7.48142 5.87751 4.81328402245e-05 1459
2.35977 7.09293 6.26684 -0.000503583496582 1460
2.36 6.73949 6.62051 -0.000304071645784 1461
2.35969 6.35043 7.00926 0.000329151876276 1462
2.35878 5.99642 7.36236 0.00132014476033 1463
2.35697 5.64196 7.71501 0.00296814414023 1464
2.35996 8.01588 6.34408 -0.000792608937359 1466
2.36037 7.66253 6.69784 -0.000886835045735 1467
2.36051 7.27369 7.08682 -0.000686674260083 1468
2.36041 6.88473 7.47568 -0.000375736169414 1469
2.36 6.49562 7.86438 5.23695405975e-05 1470
2.35919 6.14166 8.21753 0.000671384697622 1471
2.36055 8.51552 6.84503 -0.000938773666506 1473
2.36072 8.16205 7.19867 -0.00087523505489 1474
2.36079 7.77318 7.58761 -0.000695270305664 1475
2.36076 7.41961 7.94115 -0.000533646406882 1476
2.36061 7.06598 8.29463 -0.000384932416667 1477
2.36027 6.6769 8.68337 -0.000187640032703 1478
2.3608 9.01536 7.34544 -0.000853784281304 1480
2.36088 8.62649 7.73439 -0.000742898317134 1481
2.36091 8.27295 8.08796 -0.000608715999059 1482
2.3609 7.88404 8.47686 -0.000494661238735 1483
2.36083 7.53045 8.83038 -0.000433609136069 1484
2.3607 7.17683 9.18387 -0.000402228125187 1485
2.36093 9.47995 7.88098 -0.000714193179017 1487
2.36096 9.12641 8.23455 -0.000614683588582 1488
2.36097 8.77286 8.58811 -0.000506878426711 1489
2.36096 8.4193 8.94166 -0.00043045791163 1490
2.36093 8.03038 9.33055 -0.000396876497516 1491
2.36088 7.6768 9.68408 -0.000411725373039 1492
2.36097 10.01527 8.3457 -0.000593798359074 1494
2.36098 9.62637 8.73461 -0.00049996649368 1495
2.36099 9.27282 9.08817 -0.000413393804343 1496
2.36098 8.91926 9.44172 -0.000355188851935 1497
2.36097 8.53035 9.83062 -0.000335992433702 1498
2.36095 8.14143 10.21952 -0.000366825679548 1499
2.36099 10.51526 8.84573 -0.000483178029955 1501
2.361 10.12636 9.23464 -0.000403331197878 1502
2.36099 9.7728 9.58819 -0.00033365374782 1503
2.36099 9.38389 9.9771 -0.000285472000597 1504
2.36099 8.99498 10.36601 -0.000276773224723 1505
2.36098 8.60607 10.75491 -0.000311979033398 1506
2.361 11.01526 9.34574 -0.000390804824209 1508
2.361 10.62635 9.73465 -0.000324010691738 1509
2.361 10.23744 10.12356 -0.000263168115298 1510
2.361 9.84853 10.51247 -0.000228015070209 1511
2.36099 9.45962 10.90137 -0.00022584556435 1512
2.361 11.4799 9.8811 -0.000310297840079 1515
2.361 11.09099 10.27001 -0.000254669476397 1516
2.361 10.70208 10.65892 -0.000207077220992 1517
2.36099 10.31317 11.04782 -0.000181850248766 1518
2.361 9.95962 11.40138 -0.000182626379293 1519
