# Supplementary material for: Revisiting the F + HCl → HF + Cl reaction using a multireference coupled-cluster method
Source: Royal Society of Chemistry journal article supplement (doi:10.1039/c6cp05782a), 2016-01-01
Supplement: c6cp05782a2.tgz [file c6cp05782a2.tgz › supp_info_MRCC_PES/three_body_points/three_body_high_R]

3.0 6.0 3.0 0.105915332075 1
3.0 6.75 3.75 0.0716033383407 2
3.0 7.5 4.5 0.0246731798316 3
3.75 7.5 3.75 0.0315307593517 4
3.75 8.25 4.5 0.0195651241745 5
4.5 8.25 3.75 0.00899834940128 6
4.5 9.0 4.5 0.00789123557911 7
3.0 5.25 3.75 0.0924679723788 9
3.0 6.0 4.5 0.0278925125555 10
3.0 6.75 5.25 0.00438722448121 11
3.75 6.0 3.75 0.0402061886786 12
3.75 6.75 4.5 0.0251736485484 13
3.75 7.5 5.25 0.00475162637724 14
4.5 7.5 4.5 0.0103473553571 16
4.5 8.25 5.25 0.00562203160086 17
5.25 7.5 3.75 0.00273081432169 18
5.25 8.25 4.5 0.00268244819654 19
5.25 9.0 5.25 0.00251919650827 20
3.0 3.0 3.0 0.247512746332 21
3.0 3.75 3.75 0.13503225895 22
3.0 4.5 4.5 0.0502457502545 23
3.0 5.25 5.25 0.0127629533164 24
3.0 6.0 6.0 0.00205628477636 25
3.75 3.75 3.0 0.120417587595 26
3.75 4.5 3.75 0.0687453106385 27
3.75 5.25 4.5 0.0353987663386 28
3.75 6.0 5.25 0.00717647896215 29
3.75 6.75 6.0 0.000406161447245 30
4.5 5.25 3.75 0.0220681069534 31
4.5 6.0 4.5 0.0135927704171 32
4.5 6.75 5.25 0.00643408915676 33
4.5 7.5 6.0 0.000590657914017 34
5.25 6.0 3.75 0.00556269226161 35
5.25 6.75 4.5 0.00348288273938 36
5.25 7.5 5.25 0.00288987057127 37
5.25 8.25 6.0 0.00071928969237 38
6.0 6.75 3.75 0.00143516201331 39
6.0 7.5 4.5 0.000893537996262 40
6.0 8.25 5.25 0.000698805147977 41
6.0 9.0 6.0 0.000763423871035 42
3.0 3.0 4.5 0.100968384958 43
3.0 3.75 5.25 0.0597752418819 44
3.0 4.5 6.0 0.0254360732304 45
3.0 5.25 6.75 0.00729251788277 46
3.75 3.0 3.75 0.0986798251218 47
3.75 3.75 4.5 0.049159873369 48
3.75 4.5 5.25 0.0261703764071 49
3.75 5.25 6.0 0.00885994856446 50
3.75 6.0 6.75 0.00167342154543 51
4.5 3.0 3.0 0.16284139844 52
4.5 3.75 3.75 0.0630856403149 53
4.5 4.5 4.5 0.030456492951 54
4.5 6.0 6.0 0.00328593131997 56
4.5 6.75 6.75 0.000279489560171 57
5.25 4.5 3.75 0.0368330779576 58
5.25 5.25 4.5 0.0134719018287 59
5.25 6.0 5.25 0.00569126698417 60
5.25 6.75 6.0 0.00150284077529 61
5.25 7.5 6.75 -8.67169524099e-05 62
6.0 5.25 3.75 0.0122526894395 63
6.0 6.75 5.25 0.0014565260899 65
6.0 7.5 6.0 0.000982536635092 66
6.0 8.25 6.75 -0.000163630027714 67
6.75 6.0 3.75 0.00335349169961 68
6.75 6.75 4.5 0.0010365671144 69
6.75 7.5 5.25 0.000390098971252 70
6.75 8.25 6.0 0.000799221427428 71
6.75 9.0 6.75 -0.000202303522428 72
3.0 3.0 6.0 0.0923424508416 73
3.0 3.75 6.75 0.0638715422392 74
3.0 4.5 7.5 0.0228231859384 75
3.75 3.0 5.25 0.0362048873244 76
3.75 3.75 6.0 0.030337181972 77
3.75 4.5 6.75 0.0222325007785 78
4.5 3.0 4.5 0.0290181598363 80
4.5 3.75 5.25 0.0128401531565 81
4.5 4.5 6.0 0.00914825201187 82
4.5 5.25 6.75 0.00658310524136 83
4.5 6.0 7.5 0.00239113578891 84
5.25 3.0 3.75 0.0671102404848 85
5.25 3.75 4.5 0.0215855948311 86
5.25 5.25 6.0 0.00305573148751 88
5.25 6.0 6.75 0.00185618753449 89
5.25 6.75 7.5 0.00044544900129 90
6.0 3.75 3.75 0.061390518621 91
6.0 4.5 4.5 0.0202529303151 92
6.0 5.25 5.25 0.00520345625409 93
6.0 6.75 6.75 0.000446122898211 95
6.0 7.5 7.5 -7.36654178581e-05 96
6.75 4.5 3.75 0.0340202732675 97
6.75 5.25 4.5 0.0114743000546 98
6.75 6.0 5.25 0.00334140553912 99
6.75 6.75 6.0 0.000621388694299 100
6.75 7.5 6.75 -8.94081414344e-05 101
6.75 8.25 7.5 -0.00023069389556 102
7.5 5.25 3.75 0.0119090754821 103
7.5 6.0 4.5 0.00331319646477 104
7.5 6.75 5.25 0.000895085022421 105
7.5 7.5 6.0 0.000345954276781 106
7.5 8.25 6.75 -0.000162859045076 107
7.5 9.0 7.5 -0.000292221588325 108
3.75 3.0 6.75 0.0312814545317 109
3.75 3.75 7.5 0.0314177155919 110
3.75 4.5 8.25 0.022999681981 111
4.5 3.75 6.75 0.00838515333976 113
4.5 4.5 7.5 0.00853466168189 114
4.5 5.25 8.25 0.00651547091184 115
5.25 4.5 6.75 0.00186227384449 118
5.25 5.25 7.5 0.00203414078351 119
5.25 6.0 8.25 0.00154555328595 120
6.0 3.0 4.5 0.0207202259273 121
6.0 3.75 5.25 0.00427803704656 122
6.0 6.0 7.5 0.000317609093031 125
6.0 6.75 8.25 0.000320284900681 126
6.75 3.0 3.75 0.0796666671419 127
6.75 3.75 4.5 0.019840234999 128
6.75 4.5 5.25 0.00416463744909 129
6.75 5.25 6.0 0.000509880585469 130
6.75 6.0 6.75 -0.000134082898512 131
6.75 6.75 7.5 -0.00015498378275 132
6.75 7.5 8.25 -6.56531580034e-05 133
7.5 3.75 3.75 0.0567490042556 134
7.5 4.5 4.5 0.0196190395507 135
7.5 5.25 5.25 0.00435397477872 136
7.5 6.0 6.0 0.000393812542598 137
7.5 6.75 6.75 -0.000255448600228 138
7.5 7.5 7.5 -0.000263942578272 139
8.25 4.5 3.75 0.0263020379462 141
8.25 5.25 4.5 0.0107015605042 142
8.25 6.0 5.25 0.00320055031079 143
8.25 6.75 6.0 0.000360034862865 144
8.25 7.5 6.75 -0.000285727808773 145
8.25 8.25 7.5 -0.000310448027903 146
8.25 9.0 8.25 -0.000235120509387 147
4.5 3.0 7.5 0.00779714098621 148
4.5 3.75 8.25 0.00803960322628 149
4.5 4.5 9.0 0.00897853908975 150
5.25 3.0 6.75 0.00168591260967 151
5.25 3.75 7.5 0.00156446147798 152
5.25 5.25 9.0 0.00215112961735 154
6.0 3.0 6.0 0.000631023724281 155
6.0 3.75 6.75 -2.71075660976e-05 156
6.0 4.5 7.5 0.000111081144041 157
6.0 5.25 8.25 0.000331485915922 158
6.0 6.0 9.0 0.000431858209822 159
6.75 3.0 5.25 0.00428141533939 160
6.75 3.75 6.0 0.00119970622393 161
6.75 4.5 6.75 -0.000310052112582 162
6.75 5.25 7.5 -0.000195051114474 163
6.75 6.0 8.25 -0.000121270687032 164
6.75 6.75 9.0 -2.77730739526e-05 165
7.5 3.0 4.5 0.0277178919739 166
7.5 3.75 5.25 0.00415663564411 167
7.5 4.5 6.0 0.000203604600642 168
7.5 6.0 7.5 -0.000320444568388 170
7.5 6.75 8.25 -0.0002270245717 171
7.5 7.5 9.0 -0.000123815682514 172
8.25 3.75 4.5 0.0254308794987 173
8.25 5.25 6.0 0.000319382070188 175
8.25 6.0 6.75 -0.000355704829872 176
8.25 6.75 7.5 -0.000339688666031 177
8.25 7.5 8.25 -0.000234817214277 178
8.25 8.25 9.0 -0.000155571004143 179
9.0 4.5 4.5 0.0187842664503 180
9.0 5.25 5.25 0.00465635649937 181
9.0 6.0 6.0 0.000327925811234 182
9.0 6.75 6.75 -0.000338202239504 183
9.0 7.5 7.5 -0.000327155057562 184
9.0 8.25 8.25 -0.000246974067977 185
