# Supplementary material for: Revisiting the F + HCl → HF + Cl reaction using a multireference coupled-cluster method
Source: Royal Society of Chemistry journal article supplement (doi:10.1039/c6cp05782a), 2016-01-01
Supplement: c6cp05782a2.tgz [file c6cp05782a2.tgz › supp_info_MRCC_PES/three_body_points/three_body_low_lambda_subset]

9.6283 7.54266 2.08564 0.00040809211665 39
8.87798 6.79266 2.08532 0.000981037810031 40
8.12678 6.04266 2.08412 0.00267304696635 41
7.32187 5.24268 2.07919 0.00994176631833 42
6.50423 4.44291 2.06132 0.0329590979396 43
5.70738 3.69458 2.0128 0.0827046502835 44
4.80826 2.90184 1.90642 0.166824131568 45
3.92013 2.10854 1.81159 0.250019919331 46
3.89822 1.59623 2.30199 0.292994756812 47
9.11758 8.03188 2.0857 0.000659304798302 48
8.36743 7.28188 2.08555 0.000898915788537 49
7.61686 6.53188 2.08498 0.00181386589014 50
6.8647 5.78188 2.08282 0.00516247669359 51
6.05607 4.98194 2.07413 0.0172680235679 52
5.22627 4.18258 2.04369 0.0511371296443 53
4.34665 3.38732 1.95933 0.121082454318 54
3.46967 2.65066 1.81901 0.198069977003 55
2.67896 1.9084 1.77056 0.30983667179 56
2.93908 1.53462 2.40446 0.316179991714 57
3.79523 1.59325 3.20198 0.160625885605 58
8.59077 8.50505 2.08572 0.000407643977152 59
7.84066 7.75505 2.08561 0.000734954781905 60
7.09024 7.00505 2.08519 0.00114757838795 61
6.33864 6.25505 2.08359 0.00272378916227 62
5.58267 5.50507 2.0776 0.00846953351908 63
4.75949 4.70547 2.05402 0.0291626505144 64
3.88615 3.90959 1.97656 0.0891395607629 65
2.9896 3.17863 1.81097 0.21975162315 66
2.03637 2.40005 1.63632 0.489204141318 67
1.6089 1.71724 1.89166 0.780410245323 68
1.99403 1.42987 2.56416 0.564521081868 69
2.87991 1.52263 3.35728 0.22391430145 70
8.1357 9.05 2.0857 0.000612419150698 71
7.38557 8.3 2.08557 0.000698917065253 72
6.63502 7.55 2.08502 0.000982968225381 73
5.88292 6.8 2.08292 0.00205950931208 74
5.07412 6.00006 2.07406 0.00701229084872 75
4.24103 5.20088 2.04015 0.0283060812747 76
3.3982 4.45815 1.94005 0.0985517791344 77
2.4049 3.69159 1.71331 0.275619955441 78
1.54733 2.95905 1.58828 0.519448039722 79
1.17928 2.24755 1.93173 0.793492047103 80
1.17106 1.71411 2.45695 0.817077581632 81
7.63565 9.55 2.08565 0.000616623833809 82
6.88534 8.8 2.08534 0.000742820545296 83
6.13416 8.05 2.08416 0.0011961548443 84
5.32914 7.25002 2.07912 0.00323746457887 85
4.50948 6.4503 2.05918 0.0126969726512 86
1.0212 2.49437 2.52683 0.634376360018 87
1.00609 2.99942 3.00667 0.411752787456 88
10.03572 7.53306 2.50266 0.000193737450638 89
9.28504 6.78306 2.50198 0.000672328972194 90
8.48218 5.98307 2.49911 0.00278373678438 91
7.7225 5.23314 2.48936 0.0100072503544 92
6.94281 4.48381 2.459 0.0311845037052 93
6.12275 3.73761 2.38514 0.0791100942218 94
5.21282 2.94651 2.26631 0.164108695988 95
4.53073 2.17221 2.35852 0.245747543735 96
9.52467 8.02187 2.5028 0.000116405334454 97
8.77436 7.27187 2.50249 0.000363021807041 98
8.02321 6.52187 2.50134 0.00130743336112 99
7.26896 5.77188 2.49708 0.00478260610287 100
6.45282 4.97207 2.48075 0.0173872949769 101
5.60383 4.17381 2.43002 0.0530014847766 102
4.70596 3.38083 2.32513 0.128168284178 103
3.85733 2.58507 2.27226 0.232470448929 104
3.73679 2.02885 2.70794 0.23174376727 105
4.40574 1.95511 3.45063 0.110319631401 106
9.0439 8.54105 2.50285 6.86585775666e-05 107
8.29374 7.79105 2.50269 0.000181944907251 108
7.54311 7.04105 2.50206 0.000568438850051 109
6.79073 6.29105 2.49968 0.0020226166642 110
5.98104 5.49112 2.48992 0.00792083264385 111
5.20064 4.74183 2.45881 0.0258068455524 112
4.31824 3.94687 2.37137 0.0759705267997 113
3.41192 3.15536 2.25656 0.190379835813 114
2.77945 2.38177 2.39768 0.343408753225 115
3.01968 1.9663 3.05338 0.245569627295 116
3.79267 1.94152 3.85115 0.0884426397027 117
8.51457 9.01173 2.50284 4.97332169792e-05 118
7.76439 8.26173 2.50266 0.000121362294927 119
7.01369 7.51173 2.50196 0.000344484696391 120
6.21065 6.71174 2.49891 0.00128173736931 121
5.44972 5.96183 2.48789 0.00487443341909 122
4.60884 5.16308 2.44576 0.0203188044217 123
3.69777 4.3728 2.32497 0.0790803790374 124
2.74541 3.59158 2.15383 0.249950019458 125
2.08698 2.8553 2.23168 0.493695321558 126
1.9212 2.21741 2.70379 0.545680614622 127
2.22966 1.87041 3.35925 0.349647932274 128
3.02127 1.86567 4.1556 0.134619030208 129
8.05279 9.55 2.50279 4.77756967974e-05 130
7.30247 8.8 2.50247 0.000124363999809 131
6.5512 8.05 2.5012 0.000371964236865 132
5.74577 7.25002 2.49575 0.00141539332679 133
4.92437 6.45036 2.47401 0.00622716543222 134
4.0508 5.65459 2.39621 0.0289017763005 135
3.14061 4.92839 2.21222 0.111178428657 136
1.54019 3.20268 2.33751 0.531378921892 137
1.46922 2.63833 2.83089 0.522595644125 138
1.49699 2.12234 3.37465 0.463567407559 139
7.55264 10.05 2.50264 5.16882509867e-05 140
6.80187 9.3 2.50187 0.000175867296471 141
1.30987 3.28359 3.02628 0.371323069578 142
1.29873 2.71236 3.58637 0.33276618924 143
