# Supplementary material for: Revisiting the F + HCl → HF + Cl reaction using a multireference coupled-cluster method
Source: Royal Society of Chemistry journal article supplement (doi:10.1039/c6cp05782a), 2016-01-01
Supplement: c6cp05782a2.tgz [file c6cp05782a2.tgz › supp_info_MRCC_PES/three_body_points/three_body_low_R]

1.05 3.15 2.1 0.624138439346 1
1.05 3.5 2.45 0.54372629928 2
1.05 3.85 2.8 0.410660258807 3
1.05 4.2 3.15 0.276766594856 4
1.05 4.55 3.5 0.176136226727 5
1.05 4.9 3.85 0.106501307372 6
1.05 5.25 4.2 0.0608028425544 7
1.05 5.6 4.55 0.0322117137222 8
1.05 5.95 4.9 0.0159796737393 9
1.4 3.5 2.1 0.570867547678 10
1.4 3.85 2.45 0.492919596075 11
2.45 4.55 2.1 0.252424816654 12
2.8 4.9 2.1 0.167179854476 13
3.15 5.25 2.1 0.106195463225 14
3.5 5.6 2.1 0.0643542455098 15
3.5 5.95 2.45 0.0599706570772 16
3.85 5.95 2.1 0.0371847768362 17
3.85 6.3 2.45 0.0346045201871 18
4.2 6.3 2.1 0.0206341591216 19
4.2 6.65 2.45 0.0191668213378 20
4.55 6.65 2.1 0.0112541264532 21
4.55 7.0 2.45 0.0102743167786 22
4.9 7.0 2.1 0.00605486323798 23
4.9 7.35 2.45 0.00540327106864 24
1.05 2.45 2.1 0.716082090169 25
1.05 2.8 2.45 0.591009735808 26
1.05 3.15 2.8 0.451249521082 27
1.05 3.5 3.15 0.31455799672 28
1.05 3.85 3.5 0.206820748984 29
1.05 4.2 3.85 0.129601414059 30
1.05 4.55 4.2 0.0769051455715 31
1.05 4.9 4.55 0.0430937109228 32
1.05 5.25 4.9 0.0224584939953 33
1.05 5.6 5.25 0.011069773188 34
1.4 2.8 2.1 0.642581959905 35
2.45 3.85 2.1 0.284858802097 36
2.8 4.2 2.1 0.191730358142 37
3.15 4.55 2.1 0.123059913274 38
3.5 4.9 2.1 0.0751692248424 39
3.5 5.25 2.45 0.0665373502052 40
3.85 5.25 2.1 0.0438075292491 41
3.85 5.6 2.45 0.0385818134372 42
4.2 5.6 2.1 0.0245752195246 43
4.2 5.95 2.45 0.021441605327 44
4.55 5.95 2.1 0.0134700220005 45
4.55 6.3 2.45 0.0115503843106 46
4.9 6.3 2.1 0.00734548807884 47
4.9 6.65 2.45 0.006113008189 48
5.25 6.65 2.1 0.004092313461 49
5.25 7.0 2.45 0.00322775933842 50
1.05 2.1 2.45 0.74309295009 51
1.05 2.45 2.8 0.571366790643 52
1.05 2.8 3.15 0.408385638211 53
1.05 3.15 3.5 0.280150455818 54
1.05 3.5 3.85 0.185712292534 55
1.05 3.85 4.2 0.118210260326 56
1.05 4.2 4.55 0.0719597289951 57
1.05 4.55 4.9 0.0415171018872 58
1.05 4.9 5.25 0.0230088710146 59
1.05 5.25 5.6 0.0121527051526 60
1.4 2.1 2.1 0.787753045272 61
1.4 2.45 2.45 0.660989710407 62
2.45 3.15 2.1 0.36317214123 63
2.8 3.5 2.1 0.25004432923 64
3.15 3.85 2.1 0.16467073836 65
3.5 4.2 2.1 0.103417402288 66
3.5 4.55 2.45 0.0854219935252 67
3.85 4.55 2.1 0.0620069397102 68
3.85 4.9 2.45 0.0501525472058 69
4.2 4.9 2.1 0.0357351260853 70
4.2 5.25 2.45 0.0282296972771 71
4.55 5.25 2.1 0.0199962771895 72
4.55 5.6 2.45 0.0153895728956 73
4.9 5.6 2.1 0.011060104167 74
4.9 5.95 2.45 0.0082216816653 75
5.25 5.95 2.1 0.00611702098024 76
5.25 6.3 2.45 0.00436231403125 77
5.6 6.3 2.1 0.00348183540666 78
5.6 6.65 2.45 0.00233250841177 79
1.05 1.75 2.8 0.736889703499 80
1.05 2.1 3.15 0.561010560941 81
1.05 2.45 3.5 0.409553100086 82
1.05 2.8 3.85 0.289631428086 83
1.05 3.15 4.2 0.199365713295 84
1.05 3.5 4.55 0.129435769438 85
1.05 3.85 4.9 0.0815398983982 86
1.05 4.2 5.25 0.0495493947998 87
1.05 4.55 5.6 0.0288670237496 88
1.05 4.9 5.95 0.0160303759459 89
1.4 1.75 2.45 0.776910124735 90
1.4 2.1 2.8 0.628141439155 91
2.1 2.1 2.1 0.56085175744 93
2.45 2.45 2.1 0.426164556488 94
2.8 2.8 2.1 0.311818499297 95
3.15 3.15 2.1 0.219965038638 96
3.5 3.5 2.1 0.149510013843 97
3.85 3.85 2.1 0.0981593713442 98
3.85 4.2 2.45 0.0790411836571 99
4.2 4.2 2.1 0.0619589855645 100
4.2 4.55 2.45 0.047202864698 101
4.55 4.55 2.1 0.0377276805555 102
4.55 4.9 2.45 0.0271998635822 103
4.9 4.9 2.1 0.0222918707465 104
4.9 5.25 2.45 0.0152358573793 105
5.25 5.25 2.1 0.0129109405493 106
5.25 5.6 2.45 0.00836310877935 107
5.6 5.6 2.1 0.00740904382974 108
5.6 5.95 2.45 0.00453779105317 109
5.95 5.95 2.1 0.00429872047073 110
5.95 6.3 2.45 0.00245694314276 111
1.4 1.4 2.8 0.751376617287 112
1.4 1.75 3.15 0.600021088104 113
1.4 2.1 3.5 0.460560373343 114
1.75 1.4 2.45 0.681966801535 115
1.75 1.75 2.8 0.599722744866 116
2.1 1.75 2.45 0.539296831231 117
2.45 1.75 2.1 0.420537733701 118
2.8 2.1 2.1 0.337864595447 119
3.15 2.45 2.1 0.269847544767 120
3.5 2.8 2.1 0.210134759534 121
3.85 3.15 2.1 0.157234258943 122
3.85 3.5 2.45 0.130031605301 123
4.2 3.5 2.1 0.112429618599 124
4.2 3.85 2.45 0.088849739447 125
4.55 3.85 2.1 0.0771684171896 126
4.9 4.2 2.1 0.0507398275428 128
4.9 4.55 2.45 0.0347988654682 129
5.25 4.55 2.1 0.0320275379703 130
5.25 4.9 2.45 0.0207031192169 131
5.6 4.9 2.1 0.0195170976754 132
5.6 5.25 2.45 0.0119419336621 133
5.95 5.25 2.1 0.0116367132537 134
5.95 5.6 2.45 0.00671852959374 135
6.3 5.6 2.1 0.00689256988005 136
6.3 5.95 2.45 0.00371509900037 137
1.75 1.4 3.15 0.560140468319 138
1.75 1.75 3.5 0.455655494331 139
2.1 1.4 2.8 0.492809869233 140
2.1 1.75 3.15 0.422828953926 141
2.45 1.4 2.45 0.405054462359 142
2.45 1.75 2.8 0.388684602778 143
2.8 1.75 2.45 0.338112602715 144
3.15 1.75 2.1 0.291903406969 145
3.15 2.1 2.45 0.287063079355 146
3.5 2.1 2.1 0.262560245508 147
3.85 2.45 2.1 0.241918064397 148
4.2 2.8 2.1 0.213072394576 149
4.2 3.15 2.45 0.158631830748 150
4.55 3.15 2.1 0.157468154209 151
4.55 3.5 2.45 0.114471156835 152
4.9 3.5 2.1 0.11158931734 153
4.9 3.85 2.45 0.0808528483583 154
5.25 4.2 2.45 0.0518405319732 156
5.6 4.2 2.1 0.0499444449996 157
5.6 4.55 2.45 0.0325157025691 158
5.95 4.55 2.1 0.0314999429207 159
5.95 4.9 2.45 0.0196075940873 160
6.3 4.9 2.1 0.0191500783807 161
6.3 5.25 2.45 0.0114301034184 162
6.65 5.25 2.1 0.0113506133088 163
6.65 5.6 2.45 0.00648672054979 164
2.1 1.4 3.5 0.392660310573 165
2.1 1.75 3.85 0.327809088383 166
2.45 1.4 3.15 0.335530160689 167
2.45 1.75 3.5 0.286348233362 168
2.8 1.4 2.8 0.300199085444 169
2.8 1.75 3.15 0.26445563235 170
3.15 1.4 2.45 0.294702671674 171
3.15 1.75 2.8 0.258789753914 172
3.5 1.75 2.45 0.270712664823 173
3.85 1.75 2.1 0.292456003468 174
3.85 2.1 2.45 0.251384096822 175
4.2 2.1 2.1 0.262030399963 176
4.2 2.45 2.45 0.233722470295 177
4.55 2.45 2.1 0.225054224863 178
4.9 2.8 2.1 0.182828344315 179
4.9 3.15 2.45 0.155735520772 180
5.25 3.15 2.1 0.140706338572 181
5.25 3.5 2.45 0.112822083727 182
5.6 3.5 2.1 0.101798025256 183
5.95 3.85 2.1 0.0698172990097 185
5.95 4.2 2.45 0.0502336295086 186
6.3 4.2 2.1 0.0457308077879 187
6.3 4.55 2.45 0.0315329926494 188
6.65 4.55 2.1 0.0283829624957 189
6.65 4.9 2.45 0.0190124346174 190
7.0 4.9 2.1 0.0170624433604 191
7.0 5.25 2.45 0.0110638599651 192
2.45 1.4 3.85 0.263683252742 193
2.45 1.75 4.2 0.226227311989 194
2.8 1.4 3.5 0.221436369585 195
2.8 1.75 3.85 0.187808956469 196
3.15 1.4 3.15 0.207795168055 197
3.15 1.75 3.5 0.171578617349 198
3.5 1.4 2.8 0.236373367084 199
3.5 1.75 3.15 0.18113068193 200
3.85 1.4 2.45 0.289173503564 201
3.85 1.75 2.8 0.220667381662 202
3.85 2.1 3.15 0.16304468812 203
4.2 1.75 2.45 0.270741261958 204
4.2 2.1 2.8 0.206914561615 205
4.55 2.1 2.45 0.246254818673 206
4.9 2.45 2.45 0.215022821059 207
5.25 2.8 2.45 0.177429661399 208
5.6 3.15 2.45 0.137683435247 209
5.95 3.5 2.45 0.100672765551 210
6.3 3.85 2.45 0.0695671772154 211
6.65 4.2 2.45 0.0455832829897 212
7.0 4.55 2.45 0.0284341672341 213
7.35 4.9 2.45 0.0169875636992 214
2.8 1.4 4.2 0.170377395779 215
2.8 1.75 4.55 0.149074743328 216
3.15 1.4 3.85 0.140822159365 217
3.15 1.75 4.2 0.118181388726 218
3.5 1.4 3.5 0.13535227404 219
3.5 1.75 3.85 0.107358563307 220
3.85 1.4 3.15 0.168277338336 221
3.85 1.75 3.5 0.11796926012 222
3.85 2.1 3.85 0.0857743195005 223
4.2 1.4 2.8 0.242623399447 224
4.2 1.75 3.15 0.158489104211 225
4.2 2.1 3.5 0.106456530085 226
4.55 1.75 2.8 0.230898309256 227
4.55 2.1 3.15 0.149701251955 228
4.9 2.1 2.8 0.214170741148 229
3.15 1.4 4.55 0.105368944714 230
3.15 1.75 4.9 0.0940759098409 231
3.5 1.4 4.2 0.085045888197 232
3.5 1.75 4.55 0.0704270251081 233
3.85 1.4 3.85 0.0845484338175 234
3.85 1.75 4.2 0.0635686433363 235
3.85 2.1 4.55 0.0480671156291 236
4.2 1.4 3.5 0.111735455173 237
4.2 1.75 3.85 0.0738299000553 238
4.2 2.1 4.2 0.0499353231388 239
4.55 1.4 3.15 0.184497978188 240
4.55 1.75 3.5 0.106370699348 241
4.55 2.1 3.85 0.0655843564449 242
4.9 1.75 3.15 0.178465299248 243
4.9 2.1 3.5 0.101230550567 244
5.25 2.1 3.15 0.169096738871 245
3.5 1.4 4.9 0.0620425620408 246
3.5 1.75 5.25 0.0559467391857 247
3.85 1.4 4.55 0.0481504735582 248
3.85 1.75 4.9 0.03966896322 249
3.85 2.1 5.25 0.0335939926628 250
4.2 1.4 4.2 0.0495270609629 251
4.2 1.75 4.55 0.035412513128 252
4.2 2.1 4.9 0.0258055302996 253
4.55 1.4 3.85 0.070095130144 254
4.55 1.75 4.2 0.0435225949627 255
4.9 1.4 3.5 0.127922998306 257
4.9 1.75 3.85 0.0676447083446 258
4.9 2.1 4.2 0.0391954161211 259
5.25 1.75 3.5 0.125534262221 260
5.25 2.1 3.85 0.0648347935376 261
5.6 2.1 3.5 0.121146256865 262
3.85 1.4 5.25 0.0334931888258 263
3.85 1.75 5.6 0.0309362327735 264
3.85 2.1 5.95 0.0286138181922 265
4.2 1.4 4.9 0.0254611439486 266
4.2 1.75 5.25 0.0211750080776 267
4.2 2.1 5.6 0.0178617671891 268
4.55 1.4 4.55 0.0269020065635 269
4.55 1.75 4.9 0.0186004751715 270
4.55 2.1 5.25 0.0132180124002 271
4.9 1.4 4.2 0.0411700430711 272
4.9 1.75 4.55 0.0239848509862 273
4.9 2.1 4.9 0.0140834825198 274
5.25 1.4 3.85 0.0817268813477 275
5.25 1.75 4.2 0.0403553412065 276
5.25 2.1 4.55 0.0216490484192 277
5.6 1.75 3.85 0.0818571037834 278
5.6 2.1 4.2 0.0388062620669 279
5.95 2.1 3.85 0.079732625858 280
4.2 1.4 5.6 0.0167814096211 281
4.2 1.75 5.95 0.016239784651 282
4.2 2.1 6.3 0.0150600570548 283
4.55 1.4 5.25 0.0124558317713 284
4.55 1.75 5.6 0.0107599705029 285
4.55 2.1 5.95 0.00895649666757 286
4.9 1.4 4.9 0.013371233492 287
4.9 1.75 5.25 0.00921185956292 288
4.9 2.1 5.6 0.00638846020627 289
5.25 1.4 4.55 0.0215565015263 290
5.25 1.75 4.9 0.0123175804082 291
5.25 2.1 5.25 0.00673712526691 292
5.6 1.4 4.2 0.047885364294 293
5.6 1.75 4.55 0.022438351535 294
5.6 2.1 4.9 0.0110309023917 295
5.95 1.75 4.2 0.0489042953388 296
5.95 2.1 4.55 0.0216903865387 297
6.3 2.1 4.2 0.0478599032023 298
4.55 1.4 5.95 0.00766811721064 299
4.55 1.75 6.3 0.00810726464476 300
4.55 2.1 6.65 0.00746278661597 301
4.9 1.4 5.6 0.00544831578031 302
4.9 1.75 5.95 0.00520110471325 303
4.9 2.1 6.3 0.0041966087191 304
5.25 1.4 5.25 0.005837101319 305
5.25 1.75 5.6 0.00429008028766 306
5.25 2.1 5.95 0.00290131442932 307
5.6 1.4 4.9 0.0108070538067 308
5.6 1.75 5.25 0.00583440654566 309
5.6 2.1 5.6 0.00294586554207 310
5.95 1.4 4.55 0.0257866759327 311
5.95 1.75 4.9 0.0115295480416 312
5.95 2.1 5.25 0.00512348647032 313
6.3 1.75 4.55 0.0272364388653 314
6.3 2.1 4.9 0.0111453542501 315
6.65 2.1 4.55 0.0267796130038 316
4.9 1.4 6.3 0.00294560573911 317
4.9 1.75 6.65 0.00384215020767 318
4.9 2.1 7.0 0.00344306181751 319
5.25 1.4 5.95 0.00184791886238 320
5.25 1.75 6.3 0.00236301502741 321
5.25 2.1 6.65 0.00194414933173 322
5.6 1.4 5.6 0.00135256130318 323
5.6 1.75 5.95 0.00183577748203 324
5.6 2.1 6.3 0.00118558242195 325
5.95 1.4 5.25 0.00390707604038 326
5.95 1.75 5.6 0.00248657149211 327
5.95 2.1 5.95 0.00109936446574 328
6.3 1.4 4.9 0.0126377473811 329
6.3 1.75 5.25 0.00544466028998 330
6.3 2.1 5.6 0.0020917080144 331
6.65 1.75 4.9 0.0142762539797 332
6.65 2.1 5.25 0.00524554384344 333
7.0 2.1 4.9 0.0140530860307 334
