# Supplementary material for: Revisiting the F + HCl → HF + Cl reaction using a multireference coupled-cluster method
Source: Royal Society of Chemistry journal article supplement (doi:10.1039/c6cp05782a), 2016-01-01
Supplement: c6cp05782a2.tgz [file c6cp05782a2.tgz › supp_info_MRCC_PES/three_body_points/weights]

3 0.1
4 0.1
25 0.5
205 0.3
206 0.3
242 0.3
243 0.3
272 0.1
328 0.0
329 0.0
330 0.0
331 0.0
332 0.0
333 0.0
334 0.0
346 0.1
424 0.4
425 0.4
514 0.5
571 0.0
572 0.6
608 0.4
609 0.8
645 0.4
645 0.1
679 0.2
709 0.8
710 0.8
764 0.0
765 0.0
766 0.0
767 0.0
769 0.0
770 0.0
773 0.0
829 0.0
830 0.0
831 0.0
832 0.0
833 0.0
834 0.0
835 0.0
847 0.3
966 0.4
1003 0.3
1022 0.4
1023 0.4
1042 0.5
1061 0.7
1078 0.6
1113 0.5
1223 0.0
1225 0.0
1268 0.0
1269 0.0
1270 0.0
1271 0.0
1272 0.0
1273 0.0
1274 0.0
1275 0.0
1352 0.0
1420 0.5
1421 0.2
1422 0.5
1441 0.7
1457 0.5
1458 0.5
1478 0.5
1513 0.5
1514 0.5
1546 0.5
1563 0.0
1603 0.8
1604 0.8
1659 0.0
1660 0.0
1661 0.0
1662 0.0
1663 0.0
1664 0.0
1681 0.0
1707 0.7
1722 0.0
1740 0.7
1741 0.7
1742 0.7
1810 0.8
1862 0.7
1881 0.7
1898 0.8
1917 0.7
1936 0.8
1950 0.8
1968 0.8
1982 0.8
2013 0.6
2014 0.6
2042 0.7
2068 0.8
2069 0.8
2095 0.8
2096 0.8
2141 0.0
2143 0.0
2145 0.0
2170 0.0
2171 0.0
2172 0.0
2173 0.0
2174 0.0
2175 0.0
2176 0.0
2177 0.0
2189 0.7
2195 0.7
2220 0.8
2288 0.8
2316 0.8
2317 0.8
2343 0.9
2342 0.4
2361 0.6
2362 0.8
2378 0.7
2393 0.4
2394 0.6
2449 0.6
2450 0.8
2477 0.5
2478 0.8
2502 0.5
2503 0.7
2526 0.8
2552 0.8
2594 0.0
2595 0.0
2596 0.0
2597 0.0
2598 0.0
2599 0.0
2600 0.0
2601 0.0
2602 0.0
2613 0.8
2621 0.8
2638 0.0
2637 0.8
2642 0.7
2643 0.7
2651 0.6
2698 0.3
2700 0.6
2751 0.7
2781 0.8
2809 0.7
2837 0.8
2873 0.8
2898 0.8
2925 0.7
2950 0.3
2951 0.7
2994 0.7
2995 0.7
3051 0.0
3052 0.0
3053 0.0
3054 0.0
3055 0.0
3056 0.0
3057 0.0
3058 0.0
3060 0.2
