# Supplementary material for: Revisiting the F + HCl → HF + Cl reaction using a multireference coupled-cluster method
Source: Royal Society of Chemistry journal article supplement (doi:10.1039/c6cp05782a), 2016-01-01
Supplement: c6cp05782a2.tgz [file c6cp05782a2.tgz › supp_info_MRCC_PES/two_body_points/ClF_mrccsd_t_5Z]

  2.0    0.506180142626 -558.857001545821  1	 
  2.1    0.333565075256 -559.029616613191  1	 
  2.2    0.205556284150 -559.157625404297  1	 
  2.3    0.112506777929 -559.250674910518  1	 
  2.4    0.043169644249 -559.320012044198  1	 
  2.5   -0.007033474004 -559.370215162451   10	 
 2.55   -0.026443202098 -559.389624890545   10	 
  2.6   -0.042695863939 -559.405877552386   10	 
 2.65   -0.056191990148 -559.419373678595   10	 
  2.7   -0.067280457764 -559.430462146211    20    
 2.75   -0.076265587530 -559.439447275977    20    
  2.8   -0.083413455354 -559.446595143801    20    
 2.85   -0.088957304327 -559.452138992774    20    
  2.9   -0.093102130476 -559.456283818923     30   
 2.95   -0.096028503779 -559.459210192226     30   
  3.0   -0.097895791708 -559.461077480155      50  
 3.05   -0.098844905319 -559.462026593766      50  
  3.1   -0.099000651489 -559.462182339936      50  
 3.15   -0.098473744415 -559.461655432862      50  
  3.2   -0.097362543289 -559.460544231736      50  
 3.25   -0.095754548972 -559.458936237419      50  
  3.3   -0.093727670808 -559.456909359255     30   
 3.35   -0.091351485142 -559.454533173589     30   
  3.4   -0.088687612552 -559.451869300999     30   
 3.45   -0.085791387721 -559.448973076168    20    
  3.5   -0.082711912524 -559.445893600971    20    
 3.55   -0.079492922814 -559.442674611261    20    
  3.6   -0.076173382554 -559.439355071001    20    
 3.65   -0.072787892521 -559.435969580968    20    
  3.7   -0.069367178235 -559.432548866682    20    
 3.75   -0.065938636686 -559.429120325133    20    
  3.8   -0.062525984991 -559.425707673438    20    
 3.85   -0.059150005075 -559.422331693522   10     
  3.9   -0.055828921729 -559.419010610176   10	 
 3.95   -0.052578454339 -559.415760142786   10	 
  4.0   -0.049412067713 -559.412593756160   10	 
  4.2   -0.037784684182 -559.400966372629   10	 
  4.4   -0.028083521088 -559.391265209535   10	 
  4.6   -0.020380986379 -559.383562674826  1	 
  4.8   -0.014509802101 -559.377691490548  1	 
  5.0   -0.010176450670 -559.373358139117  1	 
 5.25   -0.006430124430 -559.369611812877  1	 
  5.5   -0.004011147549 -559.367192835996  1	 
 5.75   -0.002477151960 -559.365658840407  1	 
  6.0   -0.001515368201 -559.364697056648  1	 
  6.5   -0.000545507413 -559.363727195860  1	 
  7.0   -0.000175342322 -559.363357030769  1	 
  8.0    0.000012977869 -559.363168710578  1	 
  9.0    0.000030747810 -559.363150940637  1	 
 10.0    0.000024929268 -559.363156759179  1	 
 12.5    0.000010970182 -559.363170718265  1	 
 15.0    0.000005147332 -559.363176541115  1	 
 17.5    0.000002525110 -559.363179163337  1	 
 20.0    0.000001265867 -559.363180422580  1	 
 25.0    0.000000298913 -559.363181389534  1	 
 30.0    0.000000000000 -559.363181688447  1       
