# Supplementary material for: Revisiting the F + HCl → HF + Cl reaction using a multireference coupled-cluster method
Source: Royal Society of Chemistry journal article supplement (doi:10.1039/c6cp05782a), 2016-01-01
Supplement: c6cp05782a2.tgz [file c6cp05782a2.tgz › supp_info_MRCC_PES/two_body_points/ClF_mrccsd_t_cc_CBS]

  2.0   0.498587560696 -559.205493920061 1       
  2.1   0.327134931008 -559.376946549749 1       
  2.2   0.200103263369 -559.503978217388 1       
  2.3   0.107508112140 -559.596573368617 1       
  2.4   0.038915576528 -559.665165904229 1       
  2.5  -0.010650967901 -559.714732448658  10     
 2.55  -0.029777282440 -559.733858763197  10     
  2.6  -0.045769499694 -559.749850980451  10     
 2.65  -0.059025192205 -559.763106672962  10     
  2.7  -0.069891234144 -559.773972714901   20    
 2.75  -0.078672860130 -559.782754340887   20    
  2.8  -0.085632920459 -559.789714401216   20    
 2.85  -0.091004371339 -559.795085852096   20    
  2.9  -0.094989861516 -559.799071342273    30   
 2.95  -0.097769657233 -559.801851137990    30   
  3.0  -0.099501781470 -559.803583262227     50  
 3.05  -0.100324870474 -559.804406351231     50  
  3.1  -0.100364457707 -559.804445938464     50  
 3.15  -0.099730075905 -559.803811556662     50  
  3.2  -0.098519890787 -559.802601371544     50  
 3.25  -0.096819262942 -559.800900743699     50  
  3.3  -0.094706978843 -559.798788459600    30   
 3.35  -0.092251653396 -559.796333134153    30   
  3.4  -0.089513539464 -559.793595020221    30   
 3.45  -0.086550074926 -559.790631555683   20    
  3.5  -0.083407139724 -559.787488620481   20    
 3.55  -0.080129282660 -559.784210763417   20    
  3.6  -0.076755351841 -559.780836832598   20    
 3.65  -0.073318764193 -559.777400244950   20    
  3.7  -0.069851193564 -559.773932674321   20    
 3.75  -0.066379255678 -559.770460736435   20    
  3.8  -0.062925365067 -559.767006845824   20    
 3.85  -0.059512055476 -559.763593536233  10     
  3.9  -0.056155878034 -559.760237358791  10     
 3.95  -0.052872109127 -559.756953589884  10     
  4.0  -0.049675581040 -559.753757061797  10     
  4.2  -0.037948796380 -559.742030277137  10     
  4.4  -0.028180796166 -559.732262276923  10     
  4.6  -0.020435302072 -559.724516782829 1       
  4.8  -0.014538792299 -559.718620273056 1       
  5.0  -0.010191424993 -559.714272905750 1       
 5.25  -0.006437208929 -559.710518689686 1       
  5.5  -0.004015931484 -559.708097412241 1       
 5.75  -0.002481395651 -559.706562876408 1       
  6.0  -0.001519121052 -559.705600601809 1       
  6.5  -0.000549491381 -559.704630972138 1       
  7.0  -0.000177025893 -559.704258506650 1       
  8.0   0.000014763174 -559.704066717583 1       
  9.0   0.000032360033 -559.704049120724 1       
 10.0   0.000025479876 -559.704056000881 1       
 12.5   0.000010058449 -559.704071422308 1       
 15.0   0.000004058549 -559.704077422208 1       
 17.5   0.000001497605 -559.704079983152 1       
 20.0   0.000000256943 -559.704081223814 1       
 25.0  -0.000000705807 -559.704082186564 1       
 30.0   0.000000000000 -559.704081480757 1       
