# Supplementary material for: Revisiting the F + HCl → HF + Cl reaction using a multireference coupled-cluster method
Source: Royal Society of Chemistry journal article supplement (doi:10.1039/c6cp05782a), 2016-01-01
Supplement: c6cp05782a2.tgz [file c6cp05782a2.tgz › supp_info_MRCC_PES/two_body_points/ClF_mrccsd_t_QZ]

  2.0   0.512290246652 -558.836708850999 1	    
  2.1   0.338748438992 -559.010250658659 1	    
  2.2   0.209940543956 -559.139058553695 1	    
  2.3   0.116220828759 -559.232778268892 1	    
  2.4   0.046311998170 -559.302687099481 1	    
  2.5  -0.004366971384 -559.353366069035  10	    
 2.55  -0.023983022397 -559.372982120048  10	    
  2.6  -0.040423311110 -559.389422408761  10	    
 2.65  -0.054090158188 -559.403089255839  10	    
  2.7  -0.065334073402 -559.414333171053   20    
 2.75  -0.074460979584 -559.423460077235   20    
  2.8  -0.081738457676 -559.430737555327   20    
 2.85  -0.087401124207 -559.436400221858   20    
  2.9  -0.091655186204 -559.440654283855    30   
 2.95  -0.094682253144 -559.443681350795    30   
  3.0  -0.096642580842 -559.445641678493     50  
 3.05  -0.097677812281 -559.446676909932     50  
  3.1  -0.097913364938 -559.446912462589     50  
 3.15  -0.097460465964 -559.446459563615     50  
  3.2  -0.096417908955 -559.445417006606     50  
 3.25  -0.094873578470 -559.443872676121     50  
  3.3  -0.092905730963 -559.441904828614    30   
 3.35  -0.090584126025 -559.439583223676    30   
  3.4  -0.087970974715 -559.436970072366    30   
 3.45  -0.085121733354 -559.434120831005   20    
  3.5  -0.082085935349 -559.431085033000   20    
 3.55  -0.078907684836 -559.427906782487   20    
  3.6  -0.075626286203 -559.424625383854   20    
 3.65  -0.072276675459 -559.421275773110   20    
  3.7  -0.068889817375 -559.417888915026   20    
 3.75  -0.065493040460 -559.414492138111   20    
  3.8  -0.062110500232 -559.411109597883   20    
 3.85  -0.058763325162 -559.407762422813  10     
  3.9  -0.055469549001 -559.404468646652  10	    
 3.95  -0.052245383370 -559.401244481021  10	    
  4.0  -0.049104042824 -559.398103140475  10	    
  4.2  -0.037564799119 -559.386563896770  10	    
  4.4  -0.027933978905 -559.376933076556  10	    
  4.6  -0.020286077360 -559.369285175011 1	    
  4.8  -0.014455265194 -559.363454362845 1	    
  5.0  -0.010150353269 -559.359149450920 1	    
 5.25  -0.006426337642 -559.355425435293 1	    
  5.5  -0.004019441611 -559.353018539262 1	    
 5.75  -0.002491096568 -559.351490194219 1	    
  6.0  -0.001531156890 -559.350530254541 1	    
  6.5  -0.000559682069 -559.349558779720 1	    
  7.0  -0.000187076419 -559.349186174070 1	    
  8.0   0.000002483750 -559.348996613901 1	    
  9.0   0.000022671784 -559.348976425867 1	    
 10.0   0.000020298219 -559.348978799432 1	    
 12.5   0.000010726052 -559.348988371599 1	    
 15.0   0.000005291953 -559.348993805698 1	    
 17.5   0.000002571325 -559.348996526326 1	    
 20.0   0.000001284372 -559.348997813279 1	    
 25.0   0.000000303411 -559.348998794240 1	    
 30.0   0.000000000000 -559.348999097651 1       
