# Supplementary material for: Revisiting the F + HCl → HF + Cl reaction using a multireference coupled-cluster method
Source: Royal Society of Chemistry journal article supplement (doi:10.1039/c6cp05782a), 2016-01-01
Supplement: c6cp05782a2.tgz [file c6cp05782a2.tgz › supp_info_MRCC_PES/two_body_points/ClF_mrccsd_t_TZ]

  2.0   0.530219309628 -558.775644974723 1	    
  2.1   0.353421537447 -558.952442746904 1	    
  2.2   0.221956152778 -559.083908131573 1	    
  2.3   0.126035200432 -559.179829083919 1	    
  2.4   0.054549709932 -559.251314574419 1	    
  2.5   0.002672305439 -559.303191978912  10	    
 2.55  -0.017434160769 -559.323298445120  10	    
  2.6  -0.034307605961 -559.340171890312  10	    
 2.65  -0.048359968999 -559.354224253350  10	    
  2.7  -0.059949910347 -559.365814194698   20    
 2.75  -0.069390134338 -559.375254418689   20    
  2.8  -0.076953776811 -559.382818061162   20    
 2.85  -0.082879942805 -559.388744227156   20    
  2.9  -0.087378416372 -559.393242700723    30   
 2.95  -0.090633650848 -559.396497935199    30   
  3.0  -0.092808159242 -559.398672443593     50  
 3.05  -0.094045489756 -559.399909774107     50  
  3.1  -0.094472552377 -559.400336836728     50  
 3.15  -0.094201865664 -559.400066150015     50  
  3.2  -0.093333313901 -559.399197598252     50  
 3.25  -0.091955705323 -559.397819989674     50  
  3.3  -0.090148109689 -559.396012394040    30   
 3.35  -0.087980985673 -559.393845270024    30   
  3.4  -0.085516717303 -559.391381001654    30   
 3.45  -0.082811348727 -559.388675633078   20    
  3.5  -0.079914961213 -559.385779245564   20    
 3.55  -0.076871732038 -559.382736016389   20    
  3.6  -0.073720780452 -559.379585064803   20    
 3.65  -0.070497085516 -559.376361369867   20    
  3.7  -0.067231746781 -559.373096031132   20    
 3.75  -0.063951970578 -559.369816254929   20    
  3.8  -0.060681670707 -559.366545955058   20    
 3.85  -0.057441766702 -559.363306051053  10     
  3.9  -0.054250442156 -559.360114726507  10	    
 3.95  -0.051123354682 -559.356987639033  10	    
  4.0  -0.048073852944 -559.353938137295  10	    
  4.2  -0.036847728415 -559.342712012766  10	    
  4.4  -0.027445632898 -559.333309917249  10	    
  4.6  -0.019954292169 -559.325818576520 1	    
  4.8  -0.014226012642 -559.320090296993 1	    
  5.0  -0.009988987073 -559.315853271424 1	    
 5.25  -0.006320840088 -559.312185124439 1	    
  5.5  -0.003950957075 -559.309815241426 1	    
 5.75  -0.002447554992 -559.308311839343 1	    
  6.0  -0.001504611028 -559.307368895379 1	    
  6.5  -0.000554524832 -559.306418809183 1	    
  7.0  -0.000193578765 -559.306057863116 1	    
  8.0  -0.000008104288 -559.305872388639 1	    
  9.0   0.000016039507 -559.305848244844 1	    
 10.0   0.000016979694 -559.305847304657 1	    
 12.5   0.000011006548 -559.305853277803 1	    
 15.0   0.000005576482 -559.305858707869 1	    
 17.5   0.000002689889 -559.305861594462 1	    
 20.0   0.000001338223 -559.305862946128 1	    
 25.0   0.000000315363 -559.305863968988 1	    
 30.0   0.000000000000 -559.305864284351 1       
