# Supplementary material for: Revisiting the F + HCl → HF + Cl reaction using a multireference coupled-cluster method
Source: Royal Society of Chemistry journal article supplement (doi:10.1039/c6cp05782a), 2016-01-01
Supplement: c6cp05782a2.tgz [file c6cp05782a2.tgz › supp_info_MRCC_PES/two_body_points/ClF_mrccsd_TZ]

  2.0   0.531381125694 -558.763255758139 1	    
  2.1   0.354920565838 -558.939716317995 1	    
  2.2   0.223788832553 -559.070848051280 1	    
  2.3   0.126762710014 -559.167874173819 1	    
  2.4   0.055473219784 -559.239163664049 1	    
  2.5   0.003791603375 -559.290845280458  10	    
 2.55  -0.016215903003 -559.310852786836  10	    
  2.6  -0.032989484793 -559.327626368626  10	    
 2.65  -0.046941315741 -559.341578199574  10	    
  2.7  -0.058430624006 -559.353067507839   20    
 2.75  -0.067770950844 -559.362407834677   20    
  2.8  -0.075236430986 -559.369873314819   20    
 2.85  -0.081067204944 -559.375704088777   20    
  2.9  -0.085474048267 -559.380110932100    30   
 2.95  -0.088642310885 -559.383279194718    30   
  3.0  -0.090735309867 -559.385372193700     50  
 3.05  -0.091897202830 -559.386534086663     50  
  3.1  -0.092255475561 -559.386892359394     50  
 3.15  -0.091923057442 -559.386559941275     50  
  3.2  -0.091000136606 -559.385637020439     50  
 3.25  -0.089575711537 -559.384212595370     50  
  3.3  -0.087728934222 -559.382365818055    30   
 3.35  -0.085530231700 -559.380167115533    30   
  3.4  -0.083042318856 -559.377679202689    30   
 3.45  -0.080321007079 -559.374957890912   20    
  3.5  -0.077415970917 -559.372052854750   20    
 3.55  -0.074371369916 -559.369008253749   20    
  3.6  -0.071226407339 -559.365863291172   20    
 3.65  -0.068015816601 -559.362652700434   20    
  3.7  -0.064770288597 -559.359407172430   20    
 3.75  -0.061516849950 -559.356153733783   20    
  3.8  -0.058279194700 -559.352916078533   20    
 3.85  -0.055077964254 -559.349714848087  10     
  3.9  -0.051931035747 -559.346567919580  10	    
 3.95  -0.048853730409 -559.343490614242  10	    
  4.0  -0.045859031203 -559.340495915036  10	    
  4.2  -0.034894076415 -559.329530960248  10	    
  4.4  -0.025796496227 -559.320433380060  10	    
  4.6  -0.018617411027 -559.313254294860 1	    
  4.8  -0.013178998919 -559.307815882752 1	    
  5.0  -0.009190265471 -559.303827149304 1	    
 5.25  -0.005764528914 -559.300401412747 1	    
  5.5  -0.003567729277 -559.298204613110 1	    
 5.75  -0.002183288077 -559.296820171910 1	    
  6.0  -0.001320764724 -559.295957648557 1	    
  6.5  -0.000461562309 -559.295098446142 1	    
  7.0  -0.000143112472 -559.294779996305 1	    
  8.0   0.000010279143 -559.294626604690 1	    
  9.0   0.000024373405 -559.294612510428 1	    
 10.0   0.000021248710 -559.294615635123 1	    
 12.5   0.000012007620 -559.294624876213 1	    
 15.0   0.000005859853 -559.294631023980 1	    
 17.5   0.000002790818 -559.294634093015 1	    
 20.0   0.000001378280 -559.294635505553 1	    
 25.0   0.000000320052 -559.294636563781 1	    
 30.0   0.000000000000 -559.294636883833 1       
