# Supplementary material for: Revisiting the F + HCl → HF + Cl reaction using a multireference coupled-cluster method
Source: Royal Society of Chemistry journal article supplement (doi:10.1039/c6cp05782a), 2016-01-01
Supplement: c6cp05782a2.tgz [file c6cp05782a2.tgz › supp_info_MRCC_PES/two_body_points/FH_mrccsd_t_5Z]

  1.0    0.309948658246  -99.851738265269 1	  
  1.1    0.105160913182 -100.056526010333 1	  
  1.2   -0.028914033329 -100.190600956844  10	  
 1.25   -0.077018281145 -100.238705204660  10	  
  1.3   -0.115416744094 -100.277103667609  10	  
 1.35   -0.145801812365 -100.307488735880   20     
  1.4   -0.169559311693 -100.331246235208   20     
 1.45   -0.187828258911 -100.349515182426    30    
  1.5   -0.201547981266 -100.363234904781    30    
 1.55   -0.211495463978 -100.373182387493     40   
  1.6   -0.218315179989 -100.380002103504     40   
 1.65   -0.222543035048 -100.384229958563     40   
  1.7   -0.224625641929 -100.386312565444     40   
 1.75   -0.224936022146 -100.386622945661     40   
  1.8   -0.223786311899 -100.385473235414     40   
 1.85   -0.221438112497 -100.383125036012     40   
  1.9   -0.218111007893 -100.379797931408     40   
 1.95   -0.213989568338 -100.375676491853     40   
  2.0   -0.209229130780 -100.370916054295     40   
 2.05   -0.203960609683 -100.365647533198    30    
  2.1   -0.198294433816 -100.359981357331    30    
 2.15   -0.192323806386 -100.354010729901    30    
  2.2   -0.186127442006 -100.347814365521    30    
 2.25   -0.179771775873 -100.341458699388   20     
  2.3   -0.173313013060 -100.334999936575   20     
 2.35   -0.166798627781 -100.328485551296   20     
  2.4   -0.160268690731 -100.321955614246   20     
 2.45   -0.153756987870 -100.315443911385   20     
  2.5   -0.147292060680 -100.308978984195   20     
 2.55   -0.140897992773 -100.302584916288   20     
  2.6   -0.134594963967 -100.296281887482   20     
 2.65   -0.128399807822 -100.290086731337  10	  
  2.7   -0.122326944301 -100.284013867816  10	  
 2.75   -0.116388204212 -100.278075127727  10	  
  2.8   -0.110593326527 -100.272280250042  10	  
 2.85   -0.104950471097 -100.266637394612  10	  
  2.9   -0.099466321662 -100.261153245177  10	  
 2.95   -0.094146309175 -100.255833232690  10	  
  3.0   -0.088994787965 -100.250681711480  10	  
 3.25   -0.065858690535 -100.227545614050 1	  
  3.5   -0.047155545185 -100.208842468700 1	  
 3.75   -0.032707482530 -100.194394406045 1	  
  4.0   -0.022056606290 -100.183743529805 1	  
  4.5   -0.009465448418 -100.171152371933 1	  
  5.0   -0.003933786287 -100.165620709802 1	  
  6.0   -0.000713866124 -100.162400789639 1	  
  7.0   -0.000158794937 -100.161845718452 1	  
  8.0   -0.000047774403 -100.161734697918 1	  
  9.0   -0.000019223625 -100.161706147140 1	  
 10.0   -0.000009338533 -100.161696262048 1	  
 12.5   -0.000002208214 -100.161689131729 1	  
 15.0   -0.000000689583 -100.161687613098 1	  
 17.5   -0.000000253078 -100.161687176593 1	  
 20.0   -0.000000104750 -100.161687028265 1	  
 25.0   -0.000000019684 -100.161686943199 1	  
 30.0    0.000000000000 -100.161686923515 1        
