# Supplementary material for: Revisiting the F + HCl → HF + Cl reaction using a multireference coupled-cluster method
Source: Royal Society of Chemistry journal article supplement (doi:10.1039/c6cp05782a), 2016-01-01
Supplement: c6cp05782a2.tgz [file c6cp05782a2.tgz › supp_info_MRCC_PES/two_body_points/FH_mrccsd_t_cc_CBS]

  1.0   0.307382304013  -99.916518781350 1	
  1.1   0.102574924444 -100.121326160919 1	
  1.2  -0.030588812682 -100.254489898045  10	
 1.25  -0.078552969069 -100.302454054432  10	
  1.3  -0.116829349954 -100.340730435317  10	
 1.35  -0.147106788732 -100.371007874095   20     
  1.4  -0.170768079588 -100.394669164951   20     
 1.45  -0.188950322058 -100.412851407421    30    
  1.5  -0.202591753733 -100.426492839096    30    
 1.55  -0.212468988930 -100.436370074293     40   
  1.6  -0.219226113686 -100.443127199049     40   
 1.65  -0.223398933156 -100.447300018519     40   
  1.7  -0.225433665991 -100.449334751354     40   
 1.75  -0.225702774591 -100.449603859954     40   
  1.8  -0.224517457562 -100.448418542925     40   
 1.85  -0.222138464819 -100.446039550182     40   
  1.9  -0.218784375975 -100.442685461338     40   
 1.95  -0.214638879898 -100.438539965261     40   
  2.0  -0.209856432565 -100.433757517928     40   
 2.05  -0.204567934958 -100.428469020321    30    
  2.1  -0.198882963495 -100.422784048858    30    
 2.15  -0.192894619426 -100.416795704789    30    
  2.2  -0.186681451285 -100.410582536648    30    
 2.25  -0.180310028953 -100.404211114316   20     
  2.3  -0.173836508745 -100.397737594108   20     
 2.35  -0.167308496210 -100.391209581573   20     
  2.4  -0.160765926259 -100.384667011622   20     
 2.45  -0.154242606827 -100.378143692190   20     
  2.5  -0.147766739353 -100.371667824716   20     
 2.55  -0.141362501100 -100.365263586463   20     
  2.6  -0.135049726818 -100.358950812181   20     
 2.65  -0.128845029288 -100.352746114651  10	
  2.7  -0.122762868301 -100.346663953664  10	
 2.75  -0.116814957672 -100.340716043035  10	
  2.8  -0.111010760627 -100.334911845990  10	
 2.85  -0.105358049438 -100.329259134801  10	
  2.9  -0.099863763042 -100.323764848405  10	
 2.95  -0.094533800644 -100.318434886007  10	
  3.0  -0.089372007985 -100.313273093348  10	
 3.25  -0.066176189650 -100.290077275013 1	
  3.5  -0.047405015019 -100.271306100382 1	
 3.75  -0.032890610770 -100.256791696133 1	
  4.0  -0.022176270594 -100.246077355957 1	
  4.5  -0.009506204211 -100.233407289574 1	
  5.0  -0.003943973345 -100.227845058708 1	
  6.0  -0.000713246420 -100.224614331783 1	
  7.0  -0.000155521167 -100.224056606530 1	
  8.0  -0.000045231045 -100.223946316408 1	
  9.0  -0.000017938919 -100.223919024282 1	
 10.0  -0.000007571631 -100.223908656994 1	
 12.5  -0.000001852144 -100.223902937507 1	
 15.0  -0.000000625198 -100.223901710561 1	
 17.5  -0.000000241734 -100.223901327097 1	
 20.0  -0.000000100228 -100.223901185591 1	
 25.0  -0.000000019810 -100.223901105173 1	
 30.0   0.000000000000 -100.223901085363 1        
