# Supplementary material for: Revisiting the F + HCl → HF + Cl reaction using a multireference coupled-cluster method
Source: Royal Society of Chemistry journal article supplement (doi:10.1039/c6cp05782a), 2016-01-01
Supplement: c6cp05782a2.tgz [file c6cp05782a2.tgz › supp_info_MRCC_PES/two_body_points/FH_mrccsd_t_QZ]

  1.0   0.312024362437 -99.840858431817  1	     
  1.1   0.106747707761 -100.046135086493 1	     
  1.2  -0.027744762383 -100.180627556637  10	     
 1.25  -0.075995364842 -100.228878159096  10	     
  1.3  -0.114513546008 -100.267396340262  10	     
 1.35  -0.144995827702 -100.297878621956   20     
  1.4  -0.168832226668 -100.321715020922   20     
 1.45  -0.187165619974 -100.340048414228    30    
  1.5  -0.200938596258 -100.353821390512    30    
 1.55  -0.210930713008 -100.363813507262     40   
  1.6  -0.217788284746 -100.370671079000     40   
 1.65  -0.222048437163 -100.374931231417     40   
  1.7  -0.224158567432 -100.377041361686     40   
 1.75  -0.224492184034 -100.377374978288     40   
  1.8  -0.223361780251 -100.376244574505     40   
 1.85  -0.221029348252 -100.373912142506     40   
  1.9  -0.217714963314 -100.370597757568     40   
 1.95  -0.213603795132 -100.366486589386     40   
  2.0  -0.208851834391 -100.361734628645     40   
 2.05  -0.203590288405 -100.356473082659    30    
  2.1  -0.197930271778 -100.350813066032    30    
 2.15  -0.191965665519 -100.344848459773    30    
  2.2  -0.185775331287 -100.338658125541    30    
 2.25  -0.179425885906 -100.332308680160   20     
  2.3  -0.172973560297 -100.325856354551   20     
 2.35  -0.166465793497 -100.319348587751   20     
  2.4  -0.159942594993 -100.312825389247   20     
 2.45  -0.153437695114 -100.306320489368   20     
  2.5  -0.146979553507 -100.299862347761   20     
 2.55  -0.140592089836 -100.293474884090   20     
  2.6  -0.134295422187 -100.287178216441   20     
 2.65  -0.128106474549 -100.280989268803  10	     
  2.7  -0.122039433613 -100.274922227867  10	     
 2.75  -0.116106171695 -100.268988965949  10	     
  2.8  -0.110316605275 -100.263199399529  10	     
 2.85  -0.104679188303 -100.257561982557  10	     
  2.9  -0.099200556596 -100.252083350850  10	     
 2.95  -0.093885594181 -100.246768388435  10	     
  3.0  -0.088739365446 -100.241622159700  10	     
 3.25  -0.065637884191 -100.218520678445 1	     
  3.5  -0.046980723312 -100.199863517566 1	     
 3.75  -0.032579333426 -100.185462127680 1	     
  4.0  -0.021975694687 -100.174858488941 1	     
  4.5  -0.009447508365 -100.162330302619 1	     
  5.0  -0.003941490184 -100.156824284438 1	     
  6.0  -0.000723409591 -100.153606203845 1	     
  7.0  -0.000165695249 -100.153048489503 1	     
  8.0  -0.000053463853 -100.152936258107 1	     
  9.0  -0.000022048110 -100.152904842364 1	     
 10.0  -0.000010782611 -100.152893576865 1	     
 12.5  -0.000002547593 -100.152885341847 1	     
 15.0  -0.000000740950 -100.152883535204 1	     
 17.5  -0.000000263890 -100.152883058144 1	     
 20.0  -0.000000109060 -100.152882903314 1	     
 25.0  -0.000000019564 -100.152882813818 1	     
 30.0   0.000000000000 -100.152882794254 1        
