# Supplementary material for: Revisiting the F + HCl → HF + Cl reaction using a multireference coupled-cluster method
Source: Royal Society of Chemistry journal article supplement (doi:10.1039/c6cp05782a), 2016-01-01
Supplement: c6cp05782a2.tgz [file c6cp05782a2.tgz › supp_info_MRCC_PES/two_body_points/FH_mrccsd_t_TZ]

  1.0   0.319372967709 -99.808297590524  1	     
  1.1   0.113093862937 -100.014576695296 1	     
  1.2  -0.022063202279 -100.149733760512  10	     
 1.25  -0.070644345985 -100.198314904218  10	     
  1.3  -0.109491215189 -100.237161773422  10	     
 1.35  -0.140299850451 -100.267970408684   20     
  1.4  -0.164457296093 -100.292127854326   20     
 1.45  -0.183102564766 -100.310773122999    30    
  1.5  -0.197174414818 -100.324844973051    30    
 1.55  -0.207449014453 -100.335119572686     40   
  1.6  -0.214569917627 -100.342240475860     40   
 1.65  -0.219072084060 -100.346742642293     40   
  1.7  -0.221401377266 -100.349071935499     40   
 1.75  -0.221930406074 -100.349600964307     40   
  1.8  -0.220971456025 -100.348642014258     40   
 1.85  -0.218786968328 -100.346457526561     40   
  1.9  -0.215598089358 -100.343268647591     40   
 1.95  -0.211591589451 -100.339262147684     40   
  2.0  -0.206925498261 -100.334596056494     40   
 2.05  -0.201733690308 -100.329404248541    30    
  2.1  -0.196129661951 -100.323800220184    30    
 2.15  -0.190209645342 -100.317880203575    30    
  2.2  -0.184055200648 -100.311725758881    30    
 2.25  -0.177735372962 -100.305405931195   20     
  2.3  -0.171308528178 -100.298979086411   20     
 2.35  -0.164823908479 -100.292494466712   20     
  2.4  -0.158322969276 -100.285993527509   20     
 2.45  -0.151840532286 -100.279511090519   20     
  2.5  -0.145405744307 -100.273076302540   20     
 2.55  -0.139043669480 -100.266714227713   20     
  2.6  -0.132773866468 -100.260444424701   20     
 2.65  -0.126613525063 -100.254284083296  10	     
  2.7  -0.120576821639 -100.248247379872  10	     
 2.75  -0.114675793367 -100.242346351600  10	     
  2.8  -0.108920307826 -100.236590866059  10	     
 2.85  -0.103318495195 -100.230989053428  10	     
  2.9  -0.097876994676 -100.225547552909  10	     
 2.95  -0.092601213565 -100.220271771798  10	     
  3.0  -0.087495555588 -100.215166113821  10	     
 3.25  -0.064613057127 -100.192283615360 1	     
  3.5  -0.046188816530 -100.173859374763 1	     
 3.75  -0.032011928273 -100.159682486506 1	     
  4.0  -0.021592643985 -100.149263202218 1	     
  4.5  -0.009281680284 -100.136952238517 1	     
  5.0  -0.003866181106 -100.131536739339 1	     
  6.0  -0.000712497240 -100.128383055473 1	     
  7.0  -0.000171450967 -100.127842009200 1	     
  8.0  -0.000056310263 -100.127726868496 1	     
  9.0  -0.000023298574 -100.127693856807 1	     
 10.0  -0.000012604248 -100.127683162481 1	     
 12.5  -0.000002844347 -100.127673402580 1	     
 15.0  -0.000000763562 -100.127671321795 1	     
 17.5  -0.000000255435 -100.127670813668 1	     
 20.0  -0.000000104276 -100.127670662509 1	     
 25.0  -0.000000019643 -100.127670577876 1	     
 30.0   0.000000000000 -100.127670558233 1        
