# Supplementary material for: Revisiting the F + HCl → HF + Cl reaction using a multireference coupled-cluster method
Source: Royal Society of Chemistry journal article supplement (doi:10.1039/c6cp05782a), 2016-01-01
Supplement: c6cp05782a2.tgz [file c6cp05782a2.tgz › supp_info_MRCC_PES/two_body_points/FH_mrccsd_TZ]

  1.0   0.319559300310 -99.803717755921  1	     
  1.1   0.113312413135 -100.009964643096 1	     
  1.2  -0.021602794397 -100.144879850628  10	     
 1.25  -0.070115240575 -100.193392296806  10	     
  1.3  -0.108893501336 -100.232170557567  10	     
 1.35  -0.139633646541 -100.262910702772   20     
  1.4  -0.163722763360 -100.286999819591   20     
 1.45  -0.182299937545 -100.305576993776    30    
  1.5  -0.196304049545 -100.319581105776    30    
 1.55  -0.206511444667 -100.329788500898     40   
  1.6  -0.213565894873 -100.336842951104     40   
 1.65  -0.218002627597 -100.341279683828     40   
  1.7  -0.220267799168 -100.343544855399     40   
 1.75  -0.220734325858 -100.344011382089     40   
  1.8  -0.219714784122 -100.342991840353     40   
 1.85  -0.217471915618 -100.340748971849     40   
  1.9  -0.214227127487 -100.337504183718     40   
 1.95  -0.210167434559 -100.333444490790     40   
  2.0  -0.205451091101 -100.328728147332     40   
 2.05  -0.200212178475 -100.323489234706    30    
  2.1  -0.194564376170 -100.317841432401    30    
 2.15  -0.188604090844 -100.311881147075    30    
  2.2  -0.182413022265 -100.305690078496    30    
 2.25  -0.176060331825 -100.299337388056   20     
  2.3  -0.169604473716 -100.292881529947   20     
 2.35  -0.163094764187 -100.286371820418   20     
  2.4  -0.156572712319 -100.279849768550   20     
 2.45  -0.150073186117 -100.273350242348   20     
  2.5  -0.143625417847 -100.266902474078   20     
 2.55  -0.137253873133 -100.260530929364   20     
  2.6  -0.130978992121 -100.254256048352   20     
 2.65  -0.124817829823 -100.248094886054  10	     
  2.7  -0.118784592139 -100.242061648370  10	     
 2.75  -0.112891090239 -100.236168146470  10	     
  2.8  -0.107147109895 -100.230424166126  10	     
 2.85  -0.101560722430 -100.224837778661  10	     
  2.9  -0.096138534907 -100.219415591138  10	     
 2.95  -0.090885893769 -100.214162950000  10	     
  3.0  -0.085807048684 -100.209084104915  10	     
 3.25  -0.063106155200 -100.186383211431 1	     
  3.5  -0.044925358847 -100.168202415078 1	     
 3.75  -0.031019817048 -100.154296873279 1	     
  4.0  -0.020861251824 -100.144138308055 1	     
  4.5  -0.008937665128 -100.132214721359 1	     
  5.0  -0.003717863909 -100.126994920140 1	     
  6.0  -0.000682131642 -100.123959187873 1	     
  7.0  -0.000163042773 -100.123440099004 1	     
  8.0  -0.000053063788 -100.123330120019 1	     
  9.0  -0.000021755078 -100.123298811309 1	     
 10.0  -0.000011558903 -100.123288615134 1	     
 12.5  -0.000002602501 -100.123279658732 1	     
 15.0  -0.000000697799 -100.123277754030 1	     
 17.5  -0.000000233661 -100.123277289892 1	     
 20.0  -0.000000095484 -100.123277151715 1	     
 25.0  -0.000000017970 -100.123277074201 1	     
 30.0   0.000000000000 -100.123277056231 1        
