# Supplementary material for: Revisiting the F + HCl → HF + Cl reaction using a multireference coupled-cluster method
Source: Royal Society of Chemistry journal article supplement (doi:10.1039/c6cp05782a), 2016-01-01
Supplement: c6cp05782a2.tgz [file c6cp05782a2.tgz › supp_info_MRCC_PES/two_body_points/HCl_mrccsd_t_5Z]

  1.5    0.222717752354 -459.978748920996 1	 
  1.6    0.102325493030 -460.099141180320  10	 
  1.7    0.014101716125 -460.187364957225  10	 
  1.8   -0.049763946542 -460.251230619892  10	 
 1.85   -0.074502908271 -460.275969581621  10	 
  1.9   -0.095275110417 -460.296741783767  10	 
 1.95   -0.112595212120 -460.314061885470   20	 
  2.0   -0.126907237948 -460.328373911298   20	 
 2.05   -0.138595516364 -460.340062189714   20	 
  2.1   -0.147994324625 -460.349460997975    30   
 2.15   -0.155395705818 -460.356862379168    30   
  2.2   -0.161055418856 -460.362522092206     40  
 2.25   -0.165197756349 -460.366664429699     40  
  2.3   -0.168019592390 -460.369486265740     40  
 2.35   -0.169693866891 -460.371160540241     40  
  2.4   -0.170372639389 -460.371839312739     40  
 2.45   -0.170189730415 -460.371656403765     40  
  2.5   -0.169263018615 -460.370729691965     40  
 2.55   -0.167696416222 -460.369163089572     40  
  2.6   -0.165581560057 -460.367048233407     40  
 2.65   -0.162999308772 -460.364465982122     40  
  2.7   -0.160021028952 -460.361487702302     40  
 2.75   -0.156709735306 -460.358176408656    30   
  2.8   -0.153121096612 -460.354587769962    30   
 2.85   -0.149304333201 -460.350771006551    30   
  2.9   -0.145302628038 -460.346769301388    30   
 2.95   -0.141154079899 -460.342620753249    30   
  3.0   -0.136892623123 -460.338359296473   20	 
 3.05   -0.132548365219 -460.334015038569   20	 
  3.1   -0.128147313914 -460.329613987264   20	 
 3.15   -0.123712845822 -460.325179519172   20	 
  3.2   -0.119265573145 -460.320732246495   20	 
 3.25   -0.114823640520 -460.316290313870   20	 
  3.3   -0.110403007681 -460.311869681031   20	 
  3.4   -0.101680384241 -460.303147057591  10	 
  3.5   -0.093191633085 -460.294658306435  10	 
  3.6   -0.085009188886 -460.286475862236  10	 
  3.7   -0.077188249546 -460.278654922896  10	 
  3.8   -0.069769917946 -460.271236591296  10	 
  3.9   -0.062783462684 -460.264250136034  10	 
  4.0   -0.056248654544 -460.257715327894  10	 
  4.5   -0.030501697813 -460.231968371163 1	 
  5.0   -0.015156791648 -460.216623464998 1	 
  6.0   -0.003307280250 -460.204773953600 1	 
  7.0   -0.000748672774 -460.202215346124 1	 
  8.0   -0.000204834256 -460.201671507606 1	 
  9.0   -0.000072639338 -460.201539312688 1	 
 10.0   -0.000032591958 -460.201499265308 1	 
 12.5   -0.000007616871 -460.201474290221 1	 
 15.0   -0.000002383715 -460.201469057065 1	 
 17.5   -0.000000874540 -460.201467547890 1	 
 20.0   -0.000000355324 -460.201467028674 1	 
 25.0   -0.000000065554 -460.201466738904 1	 
 30.0    0.000000000000 -460.201466673350 1       
