# Supplementary material for: Revisiting the F + HCl → HF + Cl reaction using a multireference coupled-cluster method
Source: Royal Society of Chemistry journal article supplement (doi:10.1039/c6cp05782a), 2016-01-01
Supplement: c6cp05782a2.tgz [file c6cp05782a2.tgz › supp_info_MRCC_PES/two_body_points/HCl_mrccsd_t_cc_CBS]

  1.5   0.222040872366 -460.258097083962 1       
  1.6   0.100033243600 -460.380104712728  10     
  1.7   0.012028163887 -460.468109792441  10     
  1.8  -0.051759063839 -460.531897020167  10     
 1.85  -0.076452850470 -460.556590806798  10     
  1.9  -0.097165790711 -460.577303747039  10     
 1.95  -0.114412311583 -460.594550267911   20    
  2.0  -0.128640998408 -460.608778954736   20    
 2.05  -0.140240517823 -460.620378474151   20    
  2.1  -0.149549375808 -460.629687332136    30   
 2.15  -0.156863782625 -460.637001738953    30   
  2.2  -0.162441471342 -460.642579427670     40  
 2.25  -0.166507592385 -460.646645548713     40  
  2.3  -0.169257752525 -460.649395708853     40  
 2.35  -0.170866569424 -460.651004525752     40  
  2.4  -0.171484827606 -460.651622783934     40  
 2.45  -0.171247139280 -460.651385095608     40  
  2.5  -0.170268291666 -460.650406247994     40  
 2.55  -0.168655256994 -460.648793213322     40  
  2.6  -0.166496482026 -460.646634438354     40  
 2.65  -0.163873981433 -460.644011937761     40  
  2.7  -0.160858332018 -460.640996288346     40  
 2.75  -0.157513777797 -460.637651734125    30   
  2.8  -0.153893981239 -460.634031937567    30   
 2.85  -0.150049358924 -460.630187315252    30   
  2.9  -0.146022944484 -460.626160900812    30   
 2.95  -0.141850661639 -460.621988617967    30   
  3.0  -0.137568519800 -460.617706476128   20    
 3.05  -0.133204788461 -460.613342744789   20    
  3.1  -0.128785980229 -460.608923936557   20    
 3.15  -0.124335466230 -460.604473422558   20    
  3.2  -0.119872723393 -460.600010679721   20    
 3.25  -0.115414803488 -460.595552759816   20    
  3.3  -0.110980470316 -460.591118426644   20    
  3.4  -0.102228958176 -460.582366914504  10     
  3.5  -0.093710768735 -460.573848725063  10     
  3.6  -0.085497989413 -460.565635945741  10     
  3.7  -0.077646031057 -460.557783987385  10     
  3.8  -0.070195452037 -460.550333408365  10     
  3.9  -0.063174992136 -460.543312948464  10     
  4.0  -0.056605441092 -460.536743397420  10     
  4.5  -0.030703077971 -460.510841034299 1       
  5.0  -0.015254704576 -460.495392660904 1       
  6.0  -0.003333953576 -460.483471909904 1       
  7.0  -0.000760646557 -460.480898602885 1       
  8.0  -0.000209008382 -460.480346964710 1       
  9.0  -0.000073494085 -460.480211450413 1       
 10.0  -0.000033174596 -460.480171130924 1       
 12.5  -0.000006755603 -460.480144711931 1       
 15.0  -0.000002190438 -460.480140146766 1       
 17.5  -0.000000817383 -460.480138773711 1       
 20.0  -0.000000328618 -460.480138284946 1       
 25.0  -0.000000065831 -460.480138022159 1       
 30.0   0.000000000000 -460.480137956328 1       
