# Supplementary material for: Revisiting the F + HCl → HF + Cl reaction using a multireference coupled-cluster method
Source: Royal Society of Chemistry journal article supplement (doi:10.1039/c6cp05782a), 2016-01-01
Supplement: c6cp05782a2.tgz [file c6cp05782a2.tgz › supp_info_MRCC_PES/two_body_points/HCl_mrccsd_t_QZ]

  1.5   0.223501092968 -459.972497961294 1	   
  1.6   0.103092301393 -460.092906752869  10	   
  1.7   0.015193051852 -460.180806002410  10	   
  1.8  -0.048755787868 -460.244754842130  10	   
 1.85  -0.073537565237 -460.269536619499  10	   
  1.9  -0.094351668886 -460.290350723148  10	   
 1.95  -0.111711756069 -460.307710810331   20	   
  2.0  -0.126061046884 -460.322060101146   20	   
 2.05  -0.137783297473 -460.333782351735   20	   
  2.1  -0.147212397091 -460.343211451353    30   
 2.15  -0.154640199486 -460.350639253748    30   
  2.2  -0.160322548205 -460.356321602467     40  
 2.25  -0.164484091377 -460.360483145639     40  
  2.3  -0.167322237886 -460.363321292148     40  
 2.35  -0.169010544789 -460.365009599051     40  
  2.4  -0.169701663744 -460.365700718006     40  
 2.45  -0.169529913840 -460.365528968102     40  
  2.5  -0.168613520863 -460.364612575125     40  
 2.55  -0.167056559861 -460.363055614123     40  
  2.6  -0.164951008805 -460.360950063067     40  
 2.65  -0.162377717642 -460.358376771904     40  
  2.7  -0.159407972592 -460.355407026854     40  
 2.75  -0.156104609806 -460.352103664068    30   
  2.8  -0.152523384076 -460.348522438338    30   
 2.85  -0.148713368683 -460.344712422945    30   
  2.9  -0.144717908925 -460.340716963187    30   
 2.95  -0.140575320428 -460.336574374690    30   
  3.0  -0.136319485977 -460.332318540239   20	   
 3.05  -0.131980378691 -460.327979432953   20	   
  3.1  -0.127584508207 -460.323583562469   20	   
 3.15  -0.123155316370 -460.319154370632   20	   
  3.2  -0.118713524315 -460.314712578577   20	   
 3.25  -0.114277435191 -460.310276489453   20	   
  3.3  -0.109863205482 -460.305862259744   20	   
  3.4  -0.101155549709 -460.297154603971  10	   
  3.5  -0.092685029418 -460.288684083680  10	   
  3.6  -0.084524610258 -460.280523664520  10	   
  3.7  -0.076729367168 -460.272728421430  10	   
  3.8  -0.069339968890 -460.265339023152  10	   
  3.9  -0.062385144925 -460.258384199187  10	   
  4.0  -0.055883574865 -460.251882629127  10	   
  4.5  -0.030295135475 -460.226294189737 1	   
  5.0  -0.015059044013 -460.211058098275 1	   
  6.0  -0.003288236611 -460.199287290873 1	   
  7.0  -0.000742122762 -460.196741177024 1	   
  8.0  -0.000204012042 -460.196203066304 1	   
  9.0  -0.000073907782 -460.196072962044 1	   
 10.0  -0.000033889756 -460.196032944018 1	   
 12.5  -0.000008447767 -460.196007502029 1	   
 15.0  -0.000002547932 -460.196001602194 1	   
 17.5  -0.000000909017 -460.195999963279 1	   
 20.0  -0.000000370778 -460.195999425040 1	   
 25.0  -0.000000065290 -460.195999119552 1	   
 30.0   0.000000000000 -460.195999054262 1       
