# Supplementary material for: Revisiting the F + HCl → HF + Cl reaction using a multireference coupled-cluster method
Source: Royal Society of Chemistry journal article supplement (doi:10.1039/c6cp05782a), 2016-01-01
Supplement: c6cp05782a2.tgz [file c6cp05782a2.tgz › supp_info_MRCC_PES/two_body_points/HCl_mrccsd_t_TZ]

  1.5   0.227157207431 -459.950671116896 1	   
  1.6   0.106179404812 -460.071648919515  10	   
  1.7   0.017835383367 -460.159992940960  10	   
  1.8  -0.046427334814 -460.224255659141  10	   
 1.85  -0.071319795236 -460.249148119563  10	   
  1.9  -0.092217718969 -460.270046043296  10	   
 1.95  -0.109639363973 -460.287467688300   20	   
  2.0  -0.124032486534 -460.301860810861   20	   
 2.05  -0.135785080275 -460.313613404602   20	   
  2.1  -0.145234810265 -460.323063134592    30   
 2.15  -0.152676563247 -460.330504887574    30   
  2.2  -0.158368399706 -460.336196724033     40  
 2.25  -0.162536430090 -460.340364754417     40  
  2.3  -0.165378930595 -460.343207254922     40  
 2.35  -0.167069972631 -460.344898296958     40  
  2.4  -0.167762537624 -460.345590861951     40  
 2.45  -0.167591251475 -460.345419575802     40  
  2.5  -0.166674752958 -460.344503077285     40  
 2.55  -0.165117593433 -460.342945917760     40  
  2.6  -0.163012098484 -460.340840422811     40  
 2.65  -0.160439759786 -460.338268084113     40  
  2.7  -0.157472530106 -460.335300854433     40  
 2.75  -0.154173939648 -460.332002263975    30   
  2.8  -0.150600074873 -460.328428399200    30   
 2.85  -0.146800438746 -460.324628763073    30   
  2.9  -0.142818711837 -460.320647036164    30   
 2.95  -0.138693425379 -460.316521749706    30   
  3.0  -0.134458551634 -460.312286875961   20	   
 3.05  -0.130144023095 -460.307972347422   20	   
  3.1  -0.125776195321 -460.303604519648   20	   
 3.15  -0.121378264033 -460.299206588360   20	   
  3.2  -0.116970637256 -460.294798961583   20	   
 3.25  -0.112571265069 -460.290399589396   20	   
  3.3  -0.108195928693 -460.286024253020   20	   
  3.4  -0.099571138862 -460.277399463189  10	   
  3.5  -0.091188037656 -460.269016361983  10	   
  3.6  -0.083116956423 -460.260945280750  10	   
  3.7  -0.075411199586 -460.253239523913  10	   
  3.8  -0.068110328536 -460.245938652863  10	   
  3.9  -0.061242361046 -460.239070685373  10	   
  4.0  -0.054825105045 -460.232653429372  10	   
  4.5  -0.029627224229 -460.207455548556 1	   
  5.0  -0.014693257526 -460.192521581853 1	   
  6.0  -0.003210402185 -460.181038726512 1	   
  7.0  -0.000735506813 -460.178563831140 1	   
  8.0  -0.000208449479 -460.178036773806 1	   
  9.0  -0.000079157222 -460.177907481549 1	   
 10.0  -0.000037350096 -460.177865674423 1	   
 12.5  -0.000009032863 -460.177837357190 1	   
 15.0  -0.000002632071 -460.177830956398 1	   
 17.5  -0.000000908377 -460.177829232704 1	   
 20.0  -0.000000366996 -460.177828691323 1	   
 25.0  -0.000000064732 -460.177828389059 1	   
 30.0   0.000000000000 -460.177828324327 1       
