# Supplementary material for: Revisiting the F + HCl → HF + Cl reaction using a multireference coupled-cluster method
Source: Royal Society of Chemistry journal article supplement (doi:10.1039/c6cp05782a), 2016-01-01
Supplement: c6cp05782a2.tgz [file c6cp05782a2.tgz › supp_info_MRCC_PES/two_body_points/HCl_mrccsd_TZ]

  1.5   0.227511077295 -459.943833657039 1	   
  1.6   0.106299887417 -460.065044846917  10	   
  1.7   0.017941684246 -460.153403050088  10	   
  1.8  -0.046251758540 -460.217596492874  10	   
 1.85  -0.071100691020 -460.242445425354  10	   
  1.9  -0.091952658162 -460.263297392496  10	   
 1.95  -0.109327704314 -460.280672438648   20	   
  2.0  -0.123674933366 -460.295019667700   20	   
 2.05  -0.135383197296 -460.306727931630   20	   
  2.1  -0.144790580224 -460.316135314558    30   
 2.15  -0.152192091789 -460.323536826123    30   
  2.2  -0.157845784079 -460.329190518413     40  
 2.25  -0.161977670669 -460.333322405003     40  
  2.3  -0.164785980960 -460.336130715294     40  
 2.35  -0.166444716547 -460.337789450881     40  
  2.4  -0.167106825122 -460.338451559456     40  
 2.45  -0.166906904689 -460.338251639023     40  
  2.5  -0.165963545925 -460.337308280259     40  
 2.55  -0.164381326617 -460.335726060951     40  
  2.6  -0.162252533230 -460.333597267564     40  
 2.65  -0.159658640839 -460.331003375173     40  
  2.7  -0.156671581966 -460.328016316300     40  
 2.75  -0.153354875471 -460.324699609805    30   
  2.8  -0.149764592116 -460.321109326450    30   
 2.85  -0.145950216439 -460.317294950773    30   
  2.9  -0.141955404255 -460.313300138589    30   
 2.95  -0.137818653478 -460.309163387812    30   
  3.0  -0.133573903070 -460.304918637404   20	   
 3.05  -0.129251058026 -460.300595792360   20	   
  3.1  -0.124876458230 -460.296221192564   20	   
 3.15  -0.120473295529 -460.291818029863   20	   
  3.2  -0.116061981114 -460.287406715448   20	   
 3.25  -0.111660470922 -460.283005205256   20	   
  3.3  -0.107284551944 -460.278629286278   20	   
  3.4  -0.098663276574 -460.270008010908  10	   
  3.5  -0.090289916015 -460.261634650349  10	   
  3.6  -0.082234708636 -460.253579442970  10	   
  3.7  -0.074550751871 -460.245895486205  10	   
  3.8  -0.067277240495 -460.238621974829  10	   
  3.9  -0.060441851119 -460.231786585453  10	   
  4.0  -0.054062489259 -460.225407223593  10	   
  4.5  -0.029093369786 -460.200438104120 1	   
  5.0  -0.014378634510 -460.185723368844 1	   
  6.0  -0.003122291662 -460.174467025996 1	   
  7.0  -0.000708647569 -460.172053381903 1	   
  8.0  -0.000198499895 -460.171543234229 1	   
  9.0  -0.000074804936 -460.171419539270 1	   
 10.0  -0.000035171963 -460.171379906297 1	   
 12.5  -0.000008393665 -460.171353127999 1	   
 15.0  -0.000002436264 -460.171347170598 1	   
 17.5  -0.000000837217 -460.171345571551 1	   
 20.0  -0.000000338468 -460.171345072802 1	   
 25.0  -0.000000060195 -460.171344794529 1	   
 30.0   0.000000000000 -460.171344734334 1       
