# Supplementary material for: Revisiting the F + HCl → HF + Cl reaction using a multireference coupled-cluster method
Source: Royal Society of Chemistry journal article supplement (doi:10.1039/c6cp05782a), 2016-01-01
Supplement: c6cp05782a2.tgz [file c6cp05782a2.tgz › supp_info_MRCC_PES/two_body_points/README]

The files in this directory have the ab initio points used to fit the two body terms.

The columns are:
  interatomic distance, in a.u.
  column #3, shifted to make the last point 0.0
  total electronic energy, in a.u.
  weights used in the fitting
